# Supplementary material for: Nickel(II)-Catalyzed Formal [3+2] Cycloadditions between Indoles and Donor–Acceptor Cyclopropanes
Source: MDPI journal article supplement (doi:10.3390/molecules29071604), 2024-04-03
Supplement: s1 [file s1]

## SUPPLEMENTARY MATERIALS

### Nickel(II)-Catalyzed Formal [3+2] Cycloadditions Between Indoles and Donor-Acceptor Cyclopropanes

Víctor Quezada <sup>1</sup>, Mariña Castroagudín <sup>1</sup>, Felipe Verdugo <sup>2</sup>, Sergio Ortiz <sup>3</sup>, Guillermo Zaragoza <sup>4</sup>, Fabiane M. Nachtigall <sup>5</sup>, Francisco A. A. Reis <sup>6</sup>, Alejandro Castro-Alvarez <sup>7,\*</sup>, Leonardo S. Santos <sup>6,\*</sup>, Ronald Nelson <sup>1,\*</sup>

<sup>1</sup> Departamento de Química, Facultad de Ciencias, Universidad Católica del Norte, Avda. Angamos 0610, Antofagasta 1270709, Chile; [rnelson@ucn.cl](mailto:rnelson@ucn.cl)

<sup>2</sup> Departamento de Química Orgánica, Facultad de Ciencias Químicas, Universidad de Concepción, Edmundo Larenas 129, Concepción 4070371, Chile.

<sup>3</sup> UMR 7200 Laboratoire d'Innovation Thérapeutique, CNRS, Strasbourg Drug Discovery and Development Institute (IMS), Université de Strasbourg, 67400 Illkirch-Graffenstaden, France.

<sup>4</sup> Unidade de Difracción de Raios X, RIAIDT, Universidade de Santiago de Compostela, Campus VIDA, Santiago de Compostela 15782, Spain.

<sup>5</sup> Instituto de Ciencias Aplicadas, Universidad Autónoma de Chile, Talca 3467987, Chile.

<sup>6</sup> Laboratory of Asymmetric Synthesis, Chemistry Institute of Natural Resources, Universidad de Talca, Talca 3460000, Chile; [lssantos@utalca.cl](mailto:lssantos@utalca.cl)

<sup>7</sup> Departamento de Ciencias Preclínicas, Facultad de Medicina, Universidad de La Frontera, Temuco 4811230, Chile; [alejandro.castro.a@ufrontera.cl](mailto:alejandro.castro.a@ufrontera.cl)

#### General Contents

|                                                                                                                                                                                                                             |            |
|-----------------------------------------------------------------------------------------------------------------------------------------------------------------------------------------------------------------------------|------------|
| <b>1. General Procedures.....</b>                                                                                                                                                                                           | <b>2</b>   |
| <b>1-Synthesis of indole derivative .....</b>                                                                                                                                                                               | <b>3</b>   |
| Synthesis of substituted skatoles 1b to 1f (exemplified for the synthesis of 1-benzyl-5-chloro-3-methyl-1H-indole (1e)).                                                                                                    | 4          |
| Synthesis of (1-benzyl-5-nitro-1H-indol-3-yl)methyl 4-nitrobenzoate (1g).                                                                                                                                                   | 7          |
| Synthesis of 3-methyl-1-tosyl-1H-indole (1k).                                                                                                                                                                               | 8          |
| Synthesis of tert-butyl 3-methyl-1H-indole-1-carboxylate (1l).                                                                                                                                                              | 9          |
| Synthesis of 3-methyl-1-benzoyl-1H-indole (1m).                                                                                                                                                                             | 9          |
| <b>2. Synthesis of donor-acceptor cyclopropanes (exemplified for the synthesis of dimethyl 2-(4-methoxyphenyl)cyclopropane-1,1-dicarboxylate (2a)).</b>                                                                     | <b>11</b>  |
| Synthesis of dimethyl 2-vinylcyclopropane-1,1-dicarboxylate (2h).                                                                                                                                                           | 14         |
| <b>3. Optimization studies.</b>                                                                                                                                                                                             | <b>15</b>  |
| <b>4. General procedure for [3+2] cycloaddition (exemplified for the synthesis of dimethyl (1S*,3aR*,8bS*)-4-benzyl-1-(4-methoxyphenyl)-8b-methyl-1,3a,4,8b-tetrahydrocyclopenta[b]indole-3,3(2H)-dicarboxylate (3aa)).</b> | <b>20</b>  |
| <b>5. <sup>1</sup>H NMR, <sup>13</sup>C NMR, FT-IR and Mass spectra.</b>                                                                                                                                                    | <b>33</b>  |
| <b>6. Crystal data and structure refinement for 3ac.</b>                                                                                                                                                                    | <b>104</b> |

## 1. General Procedures

All the reactions were conducted in dry solvents under N<sub>2</sub> atmosphere unless otherwise stated. All reagents used were obtained from commercial suppliers and used without further purification. The abbreviation “rt” refers to reactions carried out approximately at 25 °C. Reaction mixtures were stirred using Teflon-coated magnetic stirring bars. Reaction temperatures were maintained using Thermowatch-controlled silicone oil baths. The reactions were monitored by Thin-layer chromatography (TLC) was performed on silica gel Merck 60 F<sub>254</sub> and components were visualized by observation under UV light (254 and 365 nm), and/or by treating the plates with *p*-anisaldehyde, oleum, phosphomolybdic acid or cerium nitrate solutions, followed by heating. Flash chromatography was carried out on silica gel (63-200 μm) unless otherwise stated. Drying was performed with anhydrous Na<sub>2</sub>SO<sub>4</sub>. Concentration refers to the removal of volatile solvents via distillation using a Büchi rotary evaporator R-300 followed by residual solvent removal under high vacuum. Melting points were determined using a Stuart SMP3 apparatus and were uncorrected. Infrared spectra were measured using a Perkin-Elmer FT-IR Spectrometer Spectrum Two with KBr pellets. NMR spectra were recorded in CDCl<sub>3</sub>, at 300, 400, 500 or 700 MHz (Bruker Advance III). Chemical shifts were reported in parts per million (δ) using the residual solvent signals (CDCl<sub>3</sub>: δ<sub>H</sub> 7.26, δ<sub>C</sub> 77.16) as the internal standards for the <sup>1</sup>H and <sup>13</sup>C NMR spectra and coupling constants (*J*) in Hz. Carbon types and structure assignments were determined from DEPT-NMR and two-dimensional experiments (HSQC and HMBC, COSY and NOESY). The following abbreviations are used to indicate signal multiplicity: s, singlet; d, doublet; t, triplet; q, quartet; p, pentet; dd, double doublet; td, triple doublet; ddd, doublet of doublet of doublets; m, multiplet; br, broad. Mass spectra (ESI-MS) were acquired using an Agilent 1200 ESI/APCI QToF tandem Agilent Mass QToF 6520. For the crystal structure determination, data were collected by applying the omega and phi scans method on a Bruker D8 VENTURE PHOTON III-14 diffractometer using Incoatec multilayer mirror monochromated with Mo-Kα radiation (λ = 0.71073 Å) from a microfocus sealed tube source at 100 K with detector resolution of 7.3910 pixels mm<sup>-1</sup>. Enantioselectivities were determined in an Agilent HPLC-DAD 1260 Infinity with Chiralpak IF3 analytical columns using Hexane:*i*PrOH (99:1), 0.5 mL/min.

## 1-Synthesis of indole derivative

### Synthesis of -benzyl-3-methyl-1*H*-indole (**1a**).<sup>1</sup>

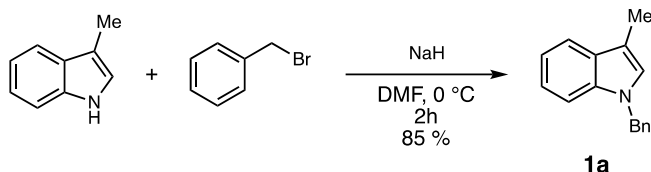

NaH (60% dispersion in mineral oil, 1.10 g, 27.44 mmol, 1.2 eq) was added portion wise over 5 min to a solution of 3-methyl-1*H*-indole (3.00 g, 22.87 mmol, 1.00 eq) in DMF (33 mL) at 0 °C, and the mixture was stirred for 30 min at room temperature. The reaction mixture was then cooled to 0 °C and benzyl bromide (3.26 mL, 27.44 mmol, 1.2 eq) was added dropwise. The resulting white precipitate was further allowed to stir at room temperature for 2 h. After completion of the reaction (as indicated by TLC), the reaction mixture was quenched with saturated ammonium chloride solution (100 mL) and the aqueous phase was extracted with diethyl ether (3 x 50 mL). The combined organic phases were dried over anhydrous Na<sub>2</sub>SO<sub>4</sub>, filtered and the solvent was removed under reduced pressure to afford indole **1a** as a white solid (4.3 g, 85%). **IR (KBr, cm<sup>-1</sup>)**  $\nu$ : 3029, 2912, 2853, 1583, 1452, 1330. **<sup>1</sup>H-NMR:** (300 MHz, CDCl<sub>3</sub>)  $\delta$  7.73 – 7.66 (m, 1H), 7.38 – 7.31 (m, 4H), 7.28 (dd,  $J$  = 6.9, 1.4 Hz, 1H), 7.20 (m, 3H), 6.96 (d,  $J$  = 1.4 Hz, 1H), 5.31 (s, 2H), 2.44 (s, 3H). **<sup>13</sup>C-NMR:** (75 MHz, CDCl<sub>3</sub>)  $\delta$  138.03, 128.81, 127.59, 126.93, 125.94, 121.74, 119.15, 118.92, 110.97, 109.57, 49.87, 9.75. The spectroscopic data agree with the literature.<sup>1</sup>

A similar procedure was followed as applied for the synthesis of **1h**, **1i** and **1j**.

### 1-benzyl-2,3-dimethyl-1*H*-indole (**1h**).

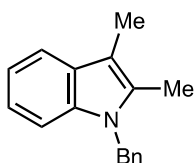

Orange solid (70%) **mp**: 62-67 °C. **IR (KBr, cm<sup>-1</sup>)**  $\nu$ : 3056, 3023, 2920, 2856, 1605, 1470, 737. **<sup>1</sup>H-NMR:** (400 MHz, CDCl<sub>3</sub>)  $\delta$  7.62 – 7.52 (m, 1H), 7.31 – 7.19 (m, 4H), 7.20 – 7.07 (m, 2H), 7.03 – 6.95 (m, 2H), 5.31 (s, 2H), 2.32 (s, 3H), 2.31 (s, 3H). **<sup>13</sup>C-NMR:** (101 MHz, CDCl<sub>3</sub>)  $\delta$  138.41, 136.52, 132.54, 128.82, 128.78, 127.27, 126.13, 120.89, 118.96, 118.12, 108.92, 107.13,

<sup>1</sup> T. R. Pradhan, H. W. Kim, J. K. Park, *Org. Lett.* **2018**, 20, 5286–5290

46.62, 10.28, 9.01. **HRMS-ESI:** Calculated for  $C_{17}H_{17}N$   $[M+H]^+ = 235.1356$ , Found: 235.1349. The spectroscopic data agree with the literature.<sup>2</sup>

#### 9-benzyl-2,3,4,9-tetrahydro-1*H*-carbazole (1i).

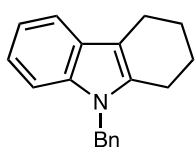

White solid (50%) **IR** ( $cm^{-1}$ )  $\nu$ : 3028, 2917, 2839, 1603, 1467, 741. **<sup>1</sup>H-NMR:** (400 MHz,  $CDCl_3$ )  $\delta$  7.68 (ddd,  $J = 6.7, 4.1, 2.6$  Hz, 1H), 7.45 – 7.34 (m, 4H), 7.31 – 7.22 (m, 2H), 7.20 – 7.13 (m, 2H), 5.40 (s, 2H), 2.94 (tt,  $J = 5.8, 1.7$  Hz, 2H), 2.80 (tt,  $J = 6.1, 1.7$  Hz, 2H), 2.06 (dtddd,  $J = 16.1, 8.4, 5.9, 4.2, 1.9$  Hz, 4H). **<sup>13</sup>C-NMR:** (101 MHz,  $CDCl_3$ )  $\delta$  138.43, 136.70, 135.69, 128.80, 127.60, 127.27, 126.29, 120.88, 118.98, 117.90, 110.00, 109.08, 46.32, 23.38, 23.33, 22.27, 21.24. **HRMS-ESI:** Calculated for  $C_{19}H_{20}N$   $[M+H]^+ = 262.1587$ , Found: 262.15903. The spectroscopic data agree with the literature.<sup>3</sup>

#### Methyl 1-benzyl-1*H*-indole-3-carboxylate (1j).

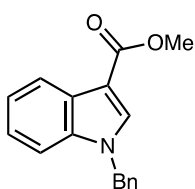

Pale yellow solid (96%) **mp:** 101-103 °C. **IR** ( $cm^{-1}$ )  $\nu$ : 3116, 3056, 2950, 2858, 1697, 1536. **<sup>1</sup>H-NMR:** (400 MHz,  $CDCl_3$ )  $\delta$  8.17 (dt,  $J = 7.8, 1.0$  Hz, 1H), 7.80 (s, 1H), 7.31 – 7.17 (m, 6H), 7.14 – 7.07 (m, 2H), 5.27 (s, 2H), 3.87 (s, 3H). **<sup>13</sup>C-NMR:** (101 MHz,  $CDCl_3$ )  $\delta$  165.55, 136.87, 136.01, 134.67, 129.10, 128.25, 127.19, 126.92, 123.07, 122.15, 121.89, 110.42, 107.66, 51.13, 50.81. **HRMS-ESI:** Calculated for  $C_{17}H_{15}NO_2Na$   $[M+Na]^+ = 288.0995$ , Found: 288.0988. The spectroscopic data agree with the literature.<sup>4</sup>

#### Synthesis of substituted skatoles 1b to 1f (exemplified for the synthesis of 1-benzyl-5-chloro-3-methyl-1*H*-indole (1e)).

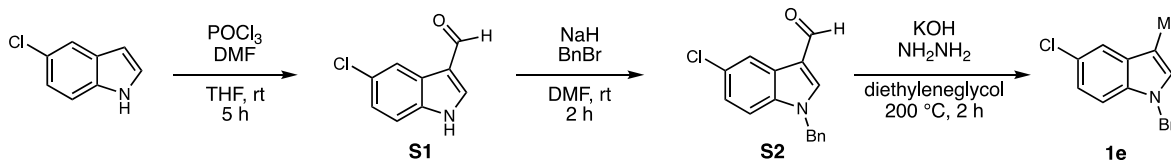

$POCl_3$  (463 mL, 4.95 mmol, 1.50 eq) were added to 3.1 mL of DMF (39.58 mmol, 1.00 eq) at 0 °C and stirred for 45 minutes. After this time, a solution of 5-chloroindole (500

<sup>2</sup> A. Saito, A. Kanno, Y. Hanzawa, *Angew. Chem. Int. Ed.* **2007**, 46, 3931–3933.

<sup>3</sup> J. Bergès, B. García, K. Muñiz, *Angew. Chem. Int. Ed.* **2018**, 57, 15891–15895.

<sup>4</sup> T. Varlet, D. Bouchet, E. Van Elslande, G. Masson, *Chem. Eur. J.* **2022**, 28, 3–8.



mg, 3.30 mmol, 1.00 eq) dissolved in 19.5 mL of THF was added and a precipitate was formed. The reaction was brought to room temperature and stirred for 4 hours. Finally, water was added to dissolve the precipitate, and the mixture was stirred overnight. It was diluted with EtOAc and washed with water (3 x 10 mL), 1% NaHCO<sub>3</sub> solution, and brine solution. Crude residue was purified by column chromatographic (50% EtOAc/hexane) to give product **S1** as a pale yellow solid (392.2 mg, 66%). **mp**: 216-218 °C; **IR** (cm<sup>-1</sup>)  $\nu$ : 3211, 3104, 3044, 1642. **<sup>1</sup>H-NMR**: (400 MHz, CDCl<sub>3</sub>)  $\delta$  10.05 (s, 1H), 8.70 (s, 1H), 8.34 (d, *J* = 2.0 Hz, 1H), 7.86 (d, *J* = 3.1 Hz, 1H), 7.37 (d, *J* = 8.6 Hz, 1H), 7.30 (dd, *J* = 8.7, 2.0 Hz, 1H). **HRMS-ESI**: Calculated for C<sub>9</sub>H<sub>7</sub>ClNO [M+H]<sup>+</sup> = 180.0211, Found: 180.0208.

Next, a protection step was carried out through an *N*-benzylation, as described in the literature:<sup>1</sup>. To a solution of 3-formylindole **S1** (300 mg, 1.67 mmol, 1.00 eq) in 2.4 mL of DMF at 0 °C, NaH (60% in mineral oil, 80.17 mg, 2 mmol, 1.20 eq) was carefully added, and the mixture was stirred for 35 minutes at 0 °C. After this time, benzyl bromide (328 mL, 2 mmol, 1.20 eq) was added, resulting in the formation of a pale yellow precipitate. The reaction was allowed to continue stirring for 2 hours until completion (as indicated by TLC), and it was quenched by adding a saturated solution of NH<sub>4</sub>Cl. The aqueous phase was extracted with diethyl ether (3x 20 mL) and the combined organic phases were dried over anhydrous Na<sub>2</sub>SO<sub>4</sub>, filtered and concentrated. The crude product was purified by column chromatography (50% EtOAc/hexane) yielding product **S2** as a yellow solid (289 mg, 64%). **mp**: 144-149 °C; **IR** (cm<sup>-1</sup>)  $\nu$ : 3102, 3025, 2819, 1654. **<sup>1</sup>H-NMR**: (400 MHz, CDCl<sub>3</sub>)  $\delta$  9.98 (s, 1H), 8.36 (dd, *J* = 1.8, 0.9 Hz, 1H), 7.74 (s, 1H), 7.44 – 7.36 (m, 3H), 7.31 – 7.24 (m, 2H), 7.23 – 7.17 (m, 2H), 5.37 (s, 2H). **<sup>13</sup>C-NMR**: (101 MHz, CDCl<sub>3</sub>)  $\delta$  184.44, 184.41, 139.26, 135.89, 135.01, 129.32, 129.19, 128.69, 127.29, 126.56, 124.67, 121.88, 118.03, 111.57, 51.29. **HRMS-ESI**: Calculated for C<sub>16</sub>H<sub>12</sub>ClNa [M+Na]<sup>+</sup> = 292.0493, Found: 292.0499.

Finally, product **S2** was reduced through a Wolff/Kishner reaction by sequentially adding KOH (374 mg, 6.67 mmol, 9.00 eq) and hydrazine monohydrate (540 mL, 11.12 mmol, 15.0 eq) to a previously prepared solution of product **S2** (200 mg, 741 mmol, 1.00 equiv.) in diethylene glycol (7.4 mL) under a nitrogen atmosphere at room temperature. The mixture was then stirred for 2 hours at 200 °C and monitored by chromatography (TLC). Once the reaction was complete, it was cooled to room temperature, diluted with Et<sub>2</sub>O, and

washed with saturated solution of  $\text{NH}_4\text{Cl}$ , water, and brine. The organic phase was dried over anhydrous  $\text{Na}_2\text{SO}_4$ , filtered and concentrated. The crude product was purified by column chromatography (10% EtOAc/hexane) to obtain product **1e** (147 mg, 78%) as a white solid. **mp**: 60-61 °C; **IR** ( $\text{cm}^{-1}$ )  $\nu$ : 3060, 3025, 2916, 2854, 1604, 1577, 1450.  **$^1\text{H}$ -NMR**: (400 MHz,  $\text{CDCl}_3$ )  $\delta$  7.53 (d,  $J$  = 1.9 Hz, 1H), 7.27 (dddd,  $J$  = 11.1, 8.9, 5.8, 2.4 Hz, 3H), 7.15 – 7.03 (m, 4H), 6.89 (d,  $J$  = 1.2 Hz, 1H), 5.21 (s, 2H), 2.28 (d,  $J$  = 1.0 Hz, 3H).  **$^{13}\text{C}$ -NMR**: (101 MHz,  $\text{CDCl}_3$ )  $\delta$  137.57, 135.14, 130.13, 128.92, 127.81, 127.36, 126.84, 124.80, 121.99, 118.73, 110.72, 110.66, 50.13. **HRMS-ESI**: Calculated for  $\text{C}_{16}\text{H}_{15}\text{ClN}$   $[\text{M}+\text{H}]^+ = 256.0888$ , Found: 256.0890. The spectroscopic data agree with the literature.<sup>5</sup>

#### 1-benzyl-3,7-dimethyl-1H-indole (1b).

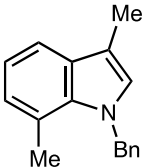 Brown solid (55%) **mp**: 48-50 °C. **IR** ( $\text{cm}^{-1}$ )  $\nu$ : 3033, 2969, 2927, 2853, 1603, 1450, 742.  **$^1\text{H}$ -NMR**: (400 MHz,  $\text{CDCl}_3$ )  $\delta$  7.45 (d,  $J$  = 7.9 Hz, 1H), 7.30 – 7.17 (m, 3H), 7.06 – 6.96 (m, 1H), 6.95 – 6.85 (m, 3H), 6.82 (d,  $J$  = 1.2 Hz, 1H), 5.50 (s, 2H), 2.51 (s, 3H), 2.33 (s, 3H).  **$^{13}\text{C}$ -NMR**: (101 MHz,  $\text{CDCl}_3$ )  $\delta$  140.12, 135.46, 130.05, 128.88, 127.89, 127.30, 125.61, 124.64, 121.01, 119.24, 117.19, 110.99, 51.96, 19.62, 9.76. **HRMS-ESI**: Calculated for  $\text{C}_{17}\text{H}_{17}\text{N}$   $[\text{M}+\text{H}]^+ = 235.1356$ , Found: 235.1349. The spectroscopic data agree with the literature.<sup>5</sup>

#### 1-benzyl-5-methoxy-3-methyl-1H-indole (1c).

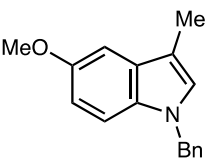 White solid (75%) **mp**: 75-77 °C. **IR** ( $\text{cm}^{-1}$ )  $\nu$ : 3029, 2915, 1581, 1493, 1231, 1041.  **$^1\text{H}$ -NMR**: (400 MHz,  $\text{CDCl}_3$ )  $\delta$  7.47 – 7.36 (m, 3H), 7.29 – 7.22 (m, 3H), 7.18 (d,  $J$  = 2.5 Hz, 1H), 7.03 (d,  $J$  = 1.1 Hz, 1H), 6.98 (dd,  $J$  = 8.8, 2.5 Hz, 1H), 5.37 (s, 2H), 4.02 (s, 3H), 2.46 (s, 3H).  **$^{13}\text{C}$ -NMR**: (101 MHz,  $\text{CDCl}_3$ )  $\delta$  153.87, 138.12, 132.09, 129.30, 128.82, 127.60, 126.86, 126.70, 111.91, 110.41, 101.02, 50.11, 9.83. **HRMS-ESI**: Calculated for  $\text{C}_{17}\text{H}_{17}\text{NO}$   $[\text{M}+\text{H}]^+ = 251.1305$ , Found: 251.1293. The spectroscopic data agree with the literature.<sup>6</sup>

#### 1-benzyl-5-bromo-3-methyl-1H-indole (1d).

<sup>5</sup> H. Xiong, H. Xu, S. Liao, Z. Xie, Y. Tang, *J. Am. Chem. Soc.* **2013**, *135*, 7851–7854.

<sup>6</sup> T. Mandal, G. Chakraborti, J. Dash, *Tetrahedron Lett.* **2020**, *61*, 152109.

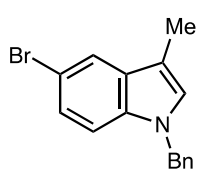

Pale brown solid (70%) **mp**: 55-57 °C. **IR** (cm<sup>-1</sup>)  $\nu$ : 3060, 3023, 2922, 2857, 1578, 1471, 1451, 1356, 1287, 790. **<sup>1</sup>H-NMR**: (400 MHz, CDCl<sub>3</sub>)  $\delta$  7.88 (d,  $J$  = 1.9 Hz, 1H), 7.46 (dddd,  $J$  = 9.6, 7.7, 5.1, 2.0 Hz, 3H), 7.41 (dd,  $J$  = 8.6, 1.9 Hz, 1H), 7.30 – 7.22 (m, 3H), 7.07 (d,  $J$  = 1.1 Hz, 1H), 5.40 (s, 2H), 2.47 (s, 3H). **<sup>13</sup>C-NMR**: (101 MHz, CDCl<sub>3</sub>)  $\delta$  137.52, 135.40, 130.79, 128.93, 127.82, 127.21, 126.83, 124.53, 121.85, 112.32, 111.12, 110.68, 50.12, 9.63. **HRMS-ESI**: Calculated for C<sub>16</sub>H<sub>15</sub>NBr [M+H]<sup>+</sup> = 300.03824, Found: 300.0385. The spectroscopic data agree with the literature.<sup>5</sup>

### 1-benzyl-6-chloro-3-methyl-1H-indole (1f).

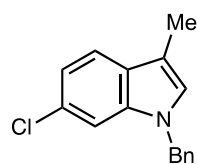

Yellow solid (82%) **mp**: 77-79 °C. **IR** (cm<sup>-1</sup>)  $\nu$ : 3083, 3060, 3028, 2918, 2858, 1605, 1469, 1327, 813. **<sup>1</sup>H-NMR**: (400 MHz, CDCl<sub>3</sub>)  $\delta$  7.65 (d,  $J$  = 8.4 Hz, 1H), 7.51 – 7.39 (m, 4H), 7.26 (ddd,  $J$  = 10.2, 7.9, 1.9 Hz, 3H), 7.05 (q,  $J$  = 1.1 Hz, 1H), 5.38 (s, 2H), 2.48 (s, 3H). **<sup>13</sup>C-NMR**: (101 MHz, CDCl<sub>3</sub>)  $\delta$  137.45, 137.14, 128.95, 127.88, 127.83, 127.65, 126.87, 126.63, 120.09, 119.63, 111.29, 109.56, 49.97, 9.67. **HRMS-ESI**: Calculated for C<sub>16</sub>H<sub>15</sub>NCl [M+H]<sup>+</sup> = 259.09, Found: 256.09. The spectroscopic data agree with the literature.<sup>7</sup>

### Synthesis of (1-benzyl-5-nitro-1H-indol-3-yl)methyl 4-nitrobenzoate (1g).

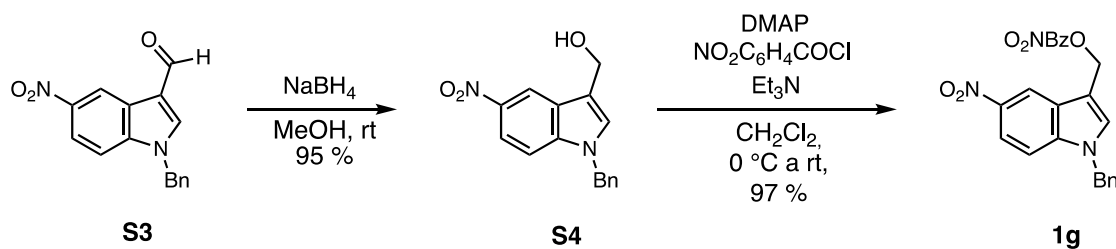

To a solution of aldehyde **S3** (100 mg, 0.357 mmol, 1.00 eq) in methanol (446 mL), NaBH<sub>4</sub> (20.25 mg, 0.535 mmol, 1.5 eq) was added, and the mixture was stirred at room temperature. After 1 hour of reaction, the starting material was completely consumed (monitored by TLC). Subsequently, 2 mL of cold water was added, and the yellow precipitate was filtered and dried under vacuum, to afford alcohol **S4** (96.2 mg, 95% yield). **<sup>1</sup>H-NMR**: (700 MHz, CDCl<sub>3</sub>)  $\delta$  8.72 (d,  $J$  = 2.3 Hz, 1H), 8.12 (dd,  $J$  = 9.1, 2.3 Hz, 1H), 7.42 – 7.25 (m,

<sup>7</sup> L. Yu, Y. Zhong, J. Yu, L. Gan, Z. Cai, R. Wang, X. Jiang, *Chem. Commun.* **2018**, 54, 2353–2356.

5H), 7.16 (dd,  $J = 8.1, 1.5$  Hz, 2H), 5.36 (s, 2H), 4.94 (d, 2H).  **$^{13}\text{C}$ -NMR:** (176 MHz,  $\text{CDCl}_3$ )  $\delta$  141.84, 139.77, 136.10, 129.92, 129.19, 128.39, 127.05, 126.74, 118.17, 118.02, 116.99, 109.93, 56.89, 50.70.

Finally, a solution of alcohol **S4** (50.0 mg, 0.177 mmol, 1.00 eq) in DCM (3.54 mL) was treated with 4-nitrobenzoyl chloride (39.44 mg, 0.212 mmol, 1.2 eq) and  $\text{Et}_3\text{N}$  (29.62  $\mu\text{L}$ , 0.212 mmol 1.2 eq). The mixture was cooled in an ice bath, and then DMAP (2.16 mg, 0.0177 mmol, 0.10 eq) was added. After 10 minutes, the ice bath was removed, and the reaction was allowed to proceed at room temperature until completion (monitored by TLC). After 8 hours of reaction, water (10 mL) was added, and the mixture was extracted with DCM (3x 20 mL). The organic phase was washed with brine, dried over anhydrous  $\text{Na}_2\text{SO}_4$ , filtered and concentrated under vacuum. Crude product was purified by column chromatography (50% EtOAc/hexane) to give product **1g** as a white solid (74.1 mg, 97%) **mp:** 164-166 °C. **IR** (**KBr**,  $\text{cm}^{-1}$ )  $\nu$ : 3088, 2943, 1721, 1530, 1330, 1271.

#### Synthesis of 3-methyl-1-tosyl-1H-indole (**1k**).

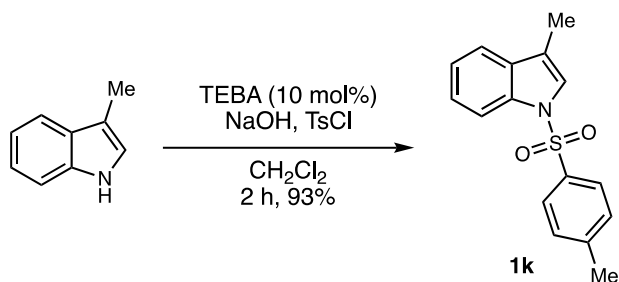

*p*-toluenesulfonyl chloride (3.20 g, 16.77 mmol, 1.10 eq), 3-methyl-1H-indole (2.00 g, 15.25 mmol, 1.00 eq), NaOH (1.07 g, 26.68 mmol, 1.75 eq), and TEBA (347.28 mg, 0.381 mmol, 0.10 eq) were mixed in DCM (60 mL) in a 100 mL round-bottom flask and allowed to react at room temperature for 2 hours (monitored by TLC). Once the reaction was complete, the mixture was filtered and concentrated under vacuum, and then purified by column chromatography, resulting in the isolation of indole derivative **1k** (93%). **IR** (**KBr**,  $\text{cm}^{-1}$ )  $\nu$ : 3110, 3054, 2918, 2856, 1914, 1594, 1444, 1362, 1170.  **$^1\text{H}$ -NMR:** (300 MHz,  $\text{CDCl}_3$ )  $\delta$  8.00 (dt,  $J = 8.2, 1.0$  Hz, 1H), 7.78 – 7.73 (m, 2H), 7.46 (ddd,  $J = 7.7, 1.5, 0.8$  Hz, 1H), 7.37 – 7.29 (m, 2H), 7.26 (dd,  $J = 7.5, 1.2$  Hz, 1H), 7.23 – 7.17 (m, 2H), 2.33 (s, 3H), 2.25 (s, 3H).  **$^{13}\text{C}$ -NMR:** (75 MHz,  $\text{CDCl}_3$ )  $\delta$  144.74, 135.63, 135.43, 131.93, 129.88, 126.86, 124.68,

123.20, 123.10, 119.50, 118.69, 113.81, 21.63, 9.77. The spectroscopic data agree with the literature.<sup>8</sup>

### Synthesis of *tert*-butyl 3-methyl-1*H*-indole-1-carboxylate (**1l**).

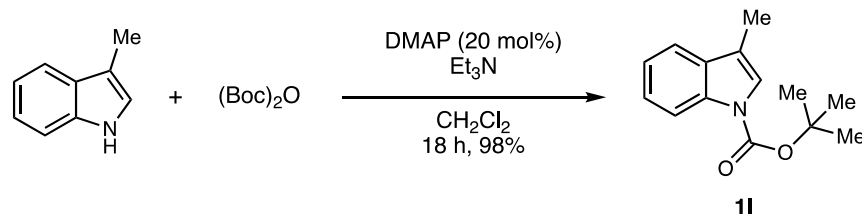

3-methyl-1*H*-indole (1.00 g, 7.22 mmol, 1.00 eq), Et<sub>3</sub>N (2.31 g, 22.87 mmol, 3.00 eq), and DMAP (186.3 mg, 1.52 mmol, 0.20 eq) were dissolved in 20.0 mL of dichloromethane, and subsequently, (Boc)<sub>2</sub>O (1.83 g, 8.39 mmol, 1.10 eq) was dissolved in dichloromethane and added dropwise to the mixture. After 18 hours of reaction, water was added, and the mixture was extracted with DCM (3x 30 mL). The combined organic phase was dried over anhydrous Na<sub>2</sub>SO<sub>4</sub> and concentrated. Finally, it was purified by column chromatography (20% EtOAc/hexane) to obtain product **1l** (98%). **IR (KBr, cm<sup>-1</sup>)**  $\nu$ : 2976, 2924, 1730, 1454, 1370, 1252, 1160, 744. **<sup>1</sup>H-NMR**: (400 MHz, CDCl<sub>3</sub>)  $\delta$  7.51 (dt,  $J$  = 7.7, 1.1 Hz, 1H), 7.38 (s, 1H), 7.34 (ddd,  $J$  = 8.4, 7.2, 1.4 Hz, 1H), 7.26 (td,  $J$  = 7.4, 1.1 Hz, 1H), 2.29 (d,  $J$  = 1.4 Hz, 3H), 1.68 (s, 9H), 1.50 (s, 1H). **<sup>13</sup>C-NMR**: (101 MHz, CDCl<sub>3</sub>)  $\delta$  149.92, 135.57, 131.55, 124.29, 122.87, 122.38, 118.97, 116.42, 115.22, 83.22, 81.08, 28.32, 27.99, 9.69, 9.67.

### Synthesis of 3-methyl-1-benzoyl-1*H*-indole (**1m**).

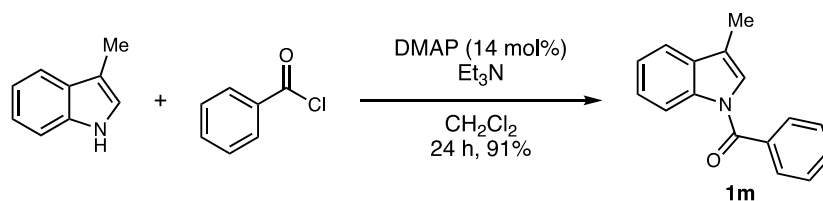

Compound **1m** was obtained using the methodology described previously, by adding indole (1.00 g, 7.62 mmol, 1.00 eq), Et<sub>3</sub>N (1.16 mg, 11.43 mmol, 1.50 eq), DMAP (130.4 mg, 1.07 mmol, 0.14 eq), and benzoyl chloride (1.29 mg, 9.15 mmol, 1.20 eq) in DCM (15.25 mL). After 24 hours of reaction, product **1m** was obtained (91%). **IR (KBr, cm<sup>-1</sup>)**  $\nu$ : 3052,

<sup>8</sup> S. W. Youn, T. Y. Ko, M. J. Jang, S. S. Jang, *Adv. Synth. Catal.* **2015**, 357, 227–234.

2914, 2860, 1786, 1668, 1446. **<sup>1</sup>H-NMR:** (400 MHz, CDCl<sub>3</sub>) δ 8.61 (dd, *J* = 7.9, 1.3 Hz, 1H), 7.96 – 7.88 (m, 2H), 7.83 – 7.68 (m, 4H), 7.63 – 7.50 (m, 2H), 7.26 (q, *J* = 1.4 Hz, 1H), 2.45 (d, *J* = 1.4 Hz, 3H). **<sup>13</sup>C-NMR:** (101 MHz, CDCl<sub>3</sub>) δ 168.47, 136.41, 135.08, 131.93, 131.70, 129.09, 128.63, 125.09, 124.48, 123.80, 118.98, 117.96, 116.59, 9.76, 9.74. The spectroscopic data agree with the literature.<sup>9</sup>

---

<sup>9</sup> S. Pan, N. Ryu, T. Shibata, *J. Am. Chem. Soc.* **2012**, *134*, 17474–17477

## 2. Synthesis of donor-acceptor cyclopropanes (exemplified for the synthesis of dimethyl 2-(4-methoxyphenyl)cyclopropane-1,1-dicarboxylate (**2a**).

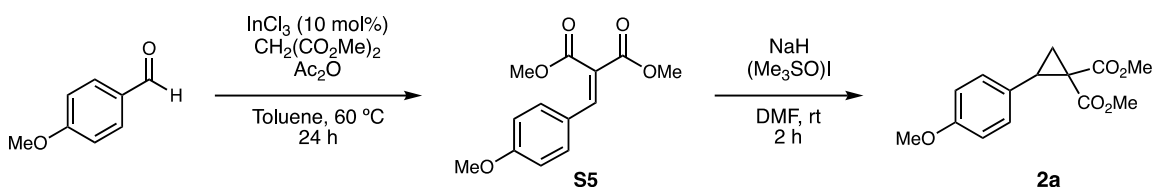

In a 25 mL round-bottom flask,  $\text{InCl}_3$  (325 mg, 1.47 mmol, 0.10 eq), toluene (14.7 mL), anisaldehyde (2.0 g, 14.7 mmol, 1.00 eq), methyl malonate (2.13 g, 16.16 mmol, 1.10 eq), and acetic anhydride (1.65 g, 16.16 mmol, 1.10 eq) were added. The mixture was heated to  $60\text{ }^\circ\text{C}$  and stirred until the reaction was complete (monitored by TLC). Once the reaction was finished, a saturated solution of  $\text{NaHCO}_3$  (20 mL) was added, and the mixture was then extracted with ethyl acetate (3 x 20 mL). The organic phase was dried over anhydrous  $\text{Na}_2\text{SO}_4$ , filtered, and concentrated using a rotary evaporator. The crude product was purified by column chromatography (10% EtOAc/hexane) to yield product **S5** (1.86 g, 90%).

A suspension of  $\text{NaH}$  (60% in mineral oil, 256.7 mg, 6.29 mmol, 1.20 eq) in DMF (10 mL) was prepared, and trimethylsulfoxonium iodide (TMSOI) (1.58 g, 7.19 mmol, 1.20 eq) was added. Gas evolution was observed for approximately 5 minutes. After 15 minutes, a solution of product **S5** (1.5 g, 5.99 mmol, 1.00 eq) in DMF (5 mL) was added, and the mixture was stirred for 2 hours. Then, a cold  $\text{HCl}$  solution (10 mL, 10%) was added and the resulting acidic solution ( $\text{pH} = 1\text{--}2$ ) was extracted with diethyl ether (4 x 5 mL). The extract was washed with  $\text{H}_2\text{O}$  (4 x 5 mL), dried over anhydrous  $\text{Na}_2\text{SO}_4$  and concentrated to yield product **2a** as a colorless oil (872 mg, 55%). **IR (KBr,  $\text{cm}^{-1}$ )  $\nu$ :** 2997, 2953, 2837, 1724, 1612, 1517, 836.  **$^1\text{H}$ -NMR:** (300 MHz,  $\text{CDCl}_3$ )  $\delta$  7.16 – 7.05 (m, 2H), 6.83 – 6.74 (m, 2H), 3.76 (s, 3H), 3.75 (s, 3H), 3.37 (s, 3H), 3.22 – 3.12 (m, 1H), 2.14 (dd,  $J = 8.0, 5.1\text{ Hz}$ , 1H), 1.70 (dd,  $J = 9.3, 5.1\text{ Hz}$ , 1H).  **$^{13}\text{C}$ -NMR:** (75 MHz,  $\text{CDCl}_3$ )  $\delta$  170.33, 167.17, 158.99, 129.66, 126.53, 113.65, 55.22, 52.73, 52.23, 37.13, 32.22, 19.28. The spectroscopic data agree with the literature.<sup>10</sup>

<sup>10</sup> R. Goudreau, D. Marcoux, B. Charette, *J. Org. Chem.* **2009**, 74, 470–473.

### Dimethyl 2-phenylcyclopropane-1,1-dicarboxylate (2b).

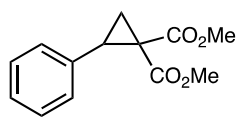

Yellow oil (70%) **IR** (KBr,  $\text{cm}^{-1}$ )  $\nu$ : 3001, 2951, 2842, 1727, 1436, 1276, 1128, 697.  **$^1\text{H-NMR}$** : (400 MHz,  $\text{CDCl}_3$ )  $\delta$  7.32 – 7.16 (m, 5H), 3.80 (s, 3H), 3.37 (s, 3H), 3.24 (t,  $J$  = 8.6 Hz, 1H), 2.21 (dd,  $J$  = 8.0, 5.2 Hz, 1H), 1.75 (dd,  $J$  = 9.2, 5.2 Hz, 1H).  **$^{13}\text{C-NMR}$** : (101 MHz,  $\text{CDCl}_3$ )  $\delta$  170.34, 167.14, 134.67, 128.53, 128.26, 127.50, 52.91, 52.30, 37.33, 32.66, 19.20. **HRMS-ESI**: Calculated for  $\text{C}_{13}\text{H}_{14}\text{O}_4\text{Na}$   $[\text{M}+\text{Na}]^+ = 257.07843$ , Found: 257.0781. The spectroscopic data agree with the literature.<sup>10</sup>

### Dimethyl 2-(4-chlorophenyl)cyclopropane-1,1-dicarboxylate (2c).

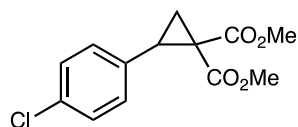

Pale yellow oil (97%) **IR** (KBr,  $\text{cm}^{-1}$ )  $\nu$ : 2997, 2953, 2843, 1725, 1437, 1279, 836.  **$^1\text{H-NMR}$** : (400 MHz,  $\text{CDCl}_3$ )  $\delta$  7.17 (d,  $J$  = 8.5 Hz, 2H), 7.05 (d,  $J$  = 8.3 Hz, 2H), 3.72 (s, 3H), 3.33 (s, 3H), 3.11 (dd,  $J$  = 9.2, 8.0 Hz, 1H), 2.08 (dd,  $J$  = 8.0, 5.3 Hz, 1H), 1.67 (dd,  $J$  = 9.3, 5.3 Hz, 1H).  **$^{13}\text{C-NMR}$** : (101 MHz,  $\text{CDCl}_3$ )  $\delta$  170.11, 166.97, 133.44, 133.29, 129.96, 128.49, 53.01, 52.50, 37.31, 31.86, 19.25. **HRMS-ESI**: Calculated for  $\text{C}_{13}\text{H}_{13}\text{ClO}_4\text{Na}$   $[\text{M}+\text{Na}]^+ = 291.03946$ , Found: 291.0388. The spectroscopic data agree with the literature.<sup>11</sup>

### Dimethyl 2-(4-bromophenyl)cyclopropane-1,1-dicarboxylate (2d).

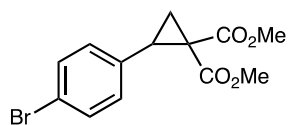

Colorless oil (48%) **IR** (KBr,  $\text{cm}^{-1}$ )  $\nu$ : 2992, 2952, 2844, 1725, 1436, 1278, 833.  **$^1\text{H-NMR}$** : (400 MHz,  $\text{CDCl}_3$ )  $\delta$  7.42 – 7.35 (m, 2H), 7.09 – 7.02 (m, 2H), 3.78 (s, 3H), 3.40 (s, 3H), 3.15 (t,  $J$  = 8.6 Hz, 1H), 2.14 (dd,  $J$  = 8.0, 5.3 Hz, 1H), 1.73 (dd,  $J$  = 9.2, 5.3 Hz, 1H).  **$^{13}\text{C-NMR}$** : (101 MHz,  $\text{CDCl}_3$ )  $\delta$  170.08, 166.94, 133.82, 131.43, 130.30, 121.56, 53.01, 52.52, 37.27, 31.89, 19.20. **HRMS-ESI**: Calculated for  $\text{C}_{13}\text{H}_{13}\text{BrO}_4\text{Na}$   $[\text{M}+\text{Na}]^+ = 332.98894$ , Found: 332.9881. The spectroscopic data agree with the literature.<sup>11</sup>

<sup>11</sup> R. A. Novikov, A. V. Tarasova, V. A. Korolev, V. P. Timofeev, Y. V. Tomilov, *Angew. Chem. Int. Ed.* **2014**, 53, 3187–3191.



**Dimethyl 2-(4-fluorophenyl)cyclopropane-1,1-dicarboxylate (2e).**

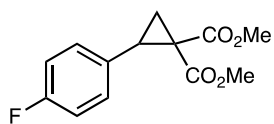

Pale yellow oil (59%) **IR** (KBr,  $\text{cm}^{-1}$ )  $\nu$ : 2997, 2954, 2844, 1726, 1515, 1278, 1218, 843.  **$^1\text{H}$ -NMR**: (400 MHz,  $\text{CDCl}_3$ )  $\delta$  7.26 (dd,  $J$  = 8.6, 5.4 Hz, 2H), 7.06 (t,  $J$  = 8.7 Hz, 2H), 3.89 (s, 3H), 3.49 (s, 3H), 3.29 (t,  $J$  = 8.6 Hz, 1H), 2.25 (dd,  $J$  = 8.0, 5.2 Hz, 1H), 1.84 (dd,  $J$  = 9.3, 5.3 Hz, 1H).  **$^{13}\text{C}$ -NMR**: (101 MHz,  $\text{CDCl}_3$ )  $\delta$  170.20, 167.05, 162.25 (d,  $J$  = 246.19 Hz), 130.27 (d,  $J$  = 8.19 Hz), 115.22 (d,  $J$  = 21.56 Hz), 52.96, 52.41, 37.19, 31.85, 19.33. **HRMS-ESI**: Calculated for  $\text{C}_{13}\text{H}_{13}\text{FO}_4\text{Na}$   $[\text{M}+\text{Na}]^+$  = 275.06901, Found: 275.0682. The spectroscopic data agree with the literature.<sup>10</sup>

**Dimethyl 2-(2,4-dichlorophenyl)cyclopropane-1,1-dicarboxylate (2f).**

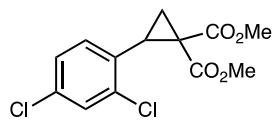

White solid (64%). **IR** (KBr,  $\text{cm}^{-1}$ )  $\nu$ : 3040, 3007, 2955, 2921, 2851, 1723, 1587, 1435, 1281, 817.  **$^1\text{H}$ -NMR**: (400 MHz,  $\text{CDCl}_3$ )  $\delta$  7.38 (d,  $J$  = 2.1 Hz, 1H), 7.17 (dd,  $J$  = 8.3, 2.1 Hz, 1H), 7.03 (d,  $J$  = 8.3 Hz, 1H), 3.82 (s, 3H), 3.42 (s, 3H), 3.29 (t,  $J$  = 8.7 Hz, 1H), 2.20 (dd,  $J$  = 8.2, 5.3 Hz, 1H), 1.79 (dd,  $J$  = 9.1, 5.3 Hz, 1H).  **$^{13}\text{C}$ -NMR**: (101 MHz,  $\text{CDCl}_3$ )  $\delta$  169.79, 167.02, 137.27, 134.10, 131.61, 129.96, 129.26, 126.83, 36.48. **HRMS-ESI**: Calculated for  $\text{C}_{13}\text{H}_{13}\text{Cl}_2\text{O}_4\text{Na}$   $[\text{M}+\text{Na}]^+$  = 325.00049, Found: 325.0005.

**Dimethyl 2-(4-nitrophenyl)cyclopropane-1,1-dicarboxylate (2g).**

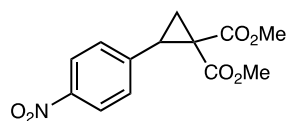

Pale yellow solid (57%) **IR** (KBr,  $\text{cm}^{-1}$ )  $\nu$ : 3091, 3085, 3005, 2956, 2845, 1731, 1599, 1516, 1344, 857.  **$^1\text{H}$ -NMR**: (400 MHz,  $\text{CDCl}_3$ )  $\delta$  8.16 – 8.10 (m, 2H), 7.39 – 7.31 (m, 2H), 3.80 (s, 3H), 3.41 (s, 3H), 3.27 (t,  $J$  = 8.6 Hz, 1H), 2.22 (dd,  $J$  = 8.0, 5.5 Hz, 1H), 1.83 (dd,  $J$  = 9.1, 5.5 Hz, 1H).  **$^{13}\text{C}$ -NMR**: (101 MHz,  $\text{CDCl}_3$ )  $\delta$  169.65, 166.63, 147.36, 142.58, 129.47, 123.53, 53.23, 52.71, 37.83, 31.68, 19.46. **HRMS-ESI**: Calculated for  $\text{C}_{13}\text{H}_{13}\text{NO}_6\text{Na}$   $[\text{M}+\text{Na}]^+$  = 302.059, Found: 302.0636. The spectroscopic data agree with the literature.<sup>12</sup>

<sup>12</sup> C. Perreault, S. R. Goudreau, L. E. Zimmer, A. B. Charette, *Org. Lett.* **2008**, 10, 689–692.

### Dimethyl (E)-2-styrylcyclopropane-1,1-dicarboxylate (**2i**).

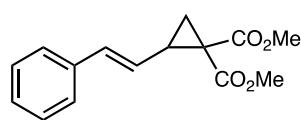

Orange oil (81%). **IR** (KBr,  $\text{cm}^{-1}$ )  $\nu$ : 3024, 2952, 2844, 1725, 1436, 1281, 962, 693.  **$^1\text{H-NMR}$** : (400 MHz,  $\text{CDCl}_3$ )  $\delta$  7.28 – 7.15 (m, 5H), 6.60 (d,  $J = 15.8$  Hz, 1H), 5.77 (dd,  $J = 15.8, 8.7$  Hz, 1H), 3.72 (s, 3H), 3.69 (s, 3H), 2.71 (q,  $J = 7.9$  Hz, 1H), 1.81 (dd,  $J = 7.6, 5.0$  Hz, 1H), 1.66 (dd,  $J = 9.0, 4.9$  Hz, 1H).  **$^{13}\text{C-NMR}$** : (101 MHz,  $\text{CDCl}_3$ )  $\delta$  170.09, 168.08, 136.80, 134.00, 128.71, 127.76, 126.29, 124.67, 52.91, 52.82, 36.17, 31.79, 21.45. **HRMS-ESI**: Calculated for  $\text{C}_{15}\text{H}_{16}\text{O}_4\text{Na}$   $[\text{M}+\text{Na}]^+ = 283.0941$ , Found: 283.0938. The spectroscopic data agree with the literature.<sup>13</sup>

### Synthesis of dimethyl 2-vinylcyclopropane-1,1-dicarboxylate (**2h**).

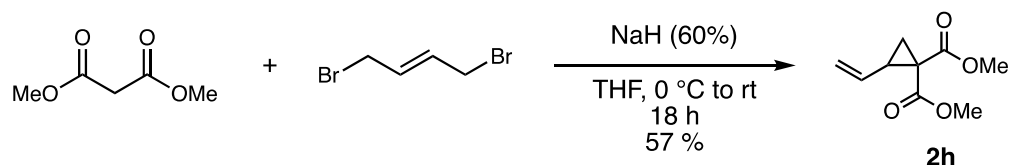

In a dry 50 mL round-bottom flask, NaH (60% in mineral oil, 666 mg, 16.65 mmol, 2.20 eq) and THF (17 mL) were added. The suspension was cooled to 0 °C, and then dimethyl malonate (1.0 g, 7.57 mmol, 1.00 eq) was carefully added. The suspension was stirred at room temperature for 45 minutes, and 1,4-dibromo-2-butene was added in one portion (1.78 g, 8.83 mmol, 1.10 eq), and the mixture was stirred for 24 hours. Upon completion of the reaction (confirmed by TLC),  $\text{Et}_2\text{O}$  (20 mL) and  $\text{H}_2\text{O}$  (20 mL) were added in equal portions, and the mixture was extracted with  $\text{Et}_2\text{O}$  (2 x 20 mL). The organic phase was washed with  $\text{H}_2\text{O}$  (20 mL) and brine (20 mL), dried over anhydrous  $\text{Na}_2\text{SO}_4$  and concentrated using a rotary evaporator. The crude product was purified by column chromatography (20%  $\text{EtOAc}$ /hexane) to obtain product **2h** as a colorless oil (793 mg, 57%). **IR** (KBr,  $\text{cm}^{-1}$ )  $\nu$ : 2939, 2923, 2852, 1731, 1442, 1438, 1274, 1129.  **$^1\text{H-NMR}$** : (400 MHz,  $\text{CDCl}_3$ )  $\delta$  5.43 (ddd,  $J = 17.0, 10.1, 8.2$  Hz, 1H), 5.34 – 5.25 (m, 1H), 5.18 – 5.11 (m, 1H), 3.74 (s, 6H), 2.63 – 2.54 (m, 1H), 1.72 (dd,  $J = 7.6, 4.9$  Hz, 1H), 1.59 (dd,  $J = 9.0, 4.9$  Hz, 1H).  **$^{13}\text{C-NMR}$** : (101 MHz,  $\text{CDCl}_3$ )  $\delta$  170.17, 167.93, 133.11, 130.94, 118.85, 35.88, 31.63, 29.84, 20.75. **HRMS-**

<sup>13</sup> R. Talukdar, D. P. Tiwari, A. Saha, M. K. Ghorai, *Org. Lett.* **2014**, 16, 3954–3957.

**ESI:** Calculated for C<sub>9</sub>H<sub>12</sub>O<sub>4</sub>Na [M+Na]<sup>+</sup> = 207.06278, Found: 207.06224. The spectroscopic data agree with the literature.<sup>14</sup>

### 3. Optimization studies.

**Table S1:** Screening of metal salt.<sup>a</sup>

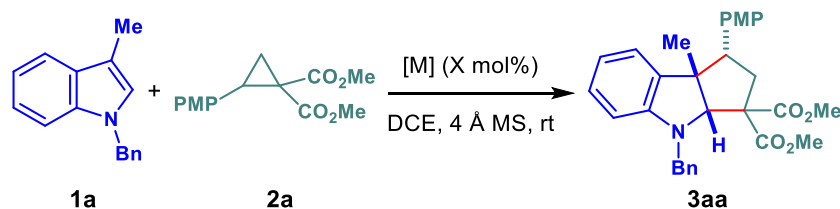

| Entry          | [M]                                                   | X mol% | t(h) | yield (%) <sup>b</sup> | Conv. (%) <sup>c</sup> | <i>dr</i> <sup>d</sup> |
|----------------|-------------------------------------------------------|--------|------|------------------------|------------------------|------------------------|
| 1              | Cu(OTf) <sub>2</sub>                                  | 20     | 24   | 79                     | >99                    | 5:1                    |
| 2              | Co(ClO <sub>4</sub> ) <sub>2</sub> ·6H <sub>2</sub> O | 20     | 24   | 42                     | -                      | 6:1                    |
| 3 <sup>e</sup> | Zn(ClO <sub>4</sub> ) <sub>2</sub> ·6H <sub>2</sub> O | 20     | 48   | 28                     | 63                     | 6.4:1                  |
| 4              | Ni(ClO <sub>4</sub> ) <sub>2</sub> ·6H <sub>2</sub> O | 20     | 24   | 95                     | >99                    | 6:1                    |
| 5              | Cu(ClO <sub>4</sub> ) <sub>2</sub> ·6H <sub>2</sub> O | 20     | 24   | 70                     | >99                    | 7.8:1                  |
| 6              | MnCl <sub>2</sub>                                     | 20     | 24   | 8                      | 25                     | -                      |
| 7              | FeCl <sub>2</sub>                                     | 20     | 24   | 27                     | 33                     | 4:1                    |
| 8              | FeCl <sub>3</sub>                                     | 20     | 24   | 3.7                    | 51                     | -                      |
| 9              | AlCl <sub>3</sub>                                     | 20     | 24   | 41                     | 74                     | 4:1                    |
| 10             | Ni(ClO <sub>4</sub> ) <sub>2</sub> ·6H <sub>2</sub> O | 10     | 24   | 48                     | 47                     | 6:1                    |
| 11             | Ni(OAc) <sub>2</sub> ·4H <sub>2</sub> O               | 10     | 24   | 9.3                    | 15                     | 5:1                    |
| 12             | Ni(OTf) <sub>2</sub>                                  | 10     | 24   | 78                     | >99                    | 5:1                    |
| 13             | NiSO <sub>4</sub> ·6H <sub>2</sub> O                  | 10     | 24   | 56                     | -                      | 4:1                    |
| 14             | Ni(NO <sub>3</sub> ) <sub>2</sub> ·6H <sub>2</sub> O  | 10     | 24   | 48                     | -                      | 9:1                    |
| 15             | NiCl <sub>2</sub>                                     | 10     | 24   | 55                     | 57                     | 3.6:1                  |
| 16             | Ni(acac) <sub>2</sub>                                 | 10     | 24   | -                      | <5                     | -                      |

<sup>a</sup> Reaction conditions: Indole **1a** (1.0 eq.) and cyclopropane **2a** (1.2 eq.), was treated with [M] (X mol%) in DCE (0.1 M) at rt and time (h). <sup>b</sup> Isolated yield. <sup>c</sup> Based on recovery of starting material. <sup>d</sup> Calculated from the <sup>1</sup>H NMR. <sup>e</sup> 24 h rt, then 24 h at 50 °C.

<sup>14</sup> A. T. Parsons, M. J. Campbell, J. S. Johnson, *Org. Lett.* **2008**, *10*, 2541–2544

**Table S2:** Screening of solvents.<sup>a</sup>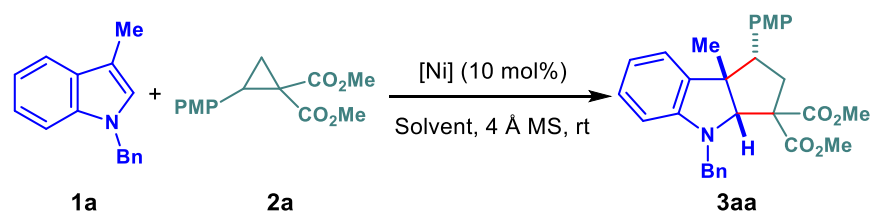

| Entry           | [Ni]                                                  | Solvent            | t(h) | yield (%) <sup>b</sup> | Conv. (%) <sup>c</sup> | <i>dr</i> <sup>d</sup> |
|-----------------|-------------------------------------------------------|--------------------|------|------------------------|------------------------|------------------------|
| 1               | Ni(OTf) <sub>2</sub>                                  | DCE                | 24   | 78                     | >99                    | 5:1                    |
| 2               | Ni(OTf) <sub>2</sub>                                  | CH <sub>3</sub> CN | 48   | -                      | <5                     | -                      |
| 3               | Ni(OTf) <sub>2</sub>                                  | Toluene            | 24   | 29                     | 76                     | 1:1                    |
| 4               | Ni(OTf) <sub>2</sub>                                  | DCM                | 24   | 47                     | 73                     | 7.7:1                  |
| 5               | Ni(OTf) <sub>2</sub>                                  | CHCl <sub>3</sub>  | 24   | 25                     | 85                     | 1:1                    |
| 6               | Ni(OTf) <sub>2</sub>                                  | AcOEt              | 48   | -                      | <5                     | -                      |
| 7               | Ni(OTf) <sub>2</sub>                                  | THF                | 48   | -                      | <5                     | -                      |
| 8               | Ni(ClO <sub>4</sub> ) <sub>2</sub> ·6H <sub>2</sub> O | AcOEt              | 48   | 33                     | 60                     | 7.5:1                  |
| 9               | Ni(ClO <sub>4</sub> ) <sub>2</sub> ·6H <sub>2</sub> O | CH <sub>3</sub> CN | 48   | -                      | <5                     | -                      |
| 10              | -                                                     | DCE                | 48   | -                      | 0                      | -                      |
| 11 <sup>e</sup> | Ni(ClO <sub>4</sub> ) <sub>2</sub> ·6H <sub>2</sub> O | DCE                |      | -                      | -                      | -                      |

<sup>a</sup> Reaction conditions: Indole **1a** (1.0 eq.) and cyclopropane **2a** (1.2 eq.), was treated with [Ni] (10 mol%) in the indicated solvent (0.1 M) at rt and time (h). <sup>b</sup> Isolated yield. <sup>c</sup> Based on recovery of starting material. <sup>d</sup> Calculated from the <sup>1</sup>H-NMR. <sup>e</sup> Reaction with addition of water (1 ppm).

**Table S3:** Screening of indoles with Ni(OTf)<sub>2</sub> (10 mol%).<sup>a</sup>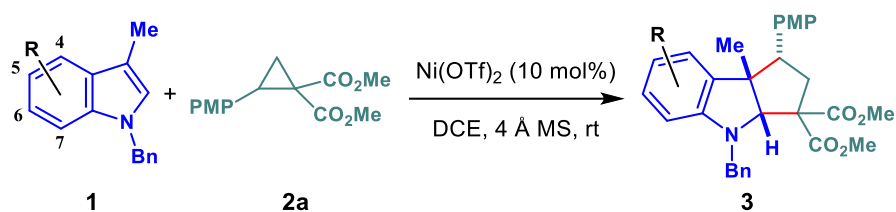

| Entry | R (1)      | t(h) | 3 yield (%) <sup>b</sup> | Conv. (%) <sup>c</sup> | <i>dr</i> <sup>d</sup> |
|-------|------------|------|--------------------------|------------------------|------------------------|
| 1     | H (1a)     | 24   | 78 (3aa)                 | >99                    | 5:1                    |
| 2     | 7-Me (1b)  | 192  | - (3ba)                  | <5                     | -                      |
| 3     | 5-OMe (1c) | 144  | 44 (3ca)                 | 90                     | 4:1                    |
| 4     | 5-Br (1d)  | 144  | 28 (3da)                 | 73                     | 2:1                    |
| 5     | 5-Cl (1e)  | 120  | 30 (3ea)                 | >99                    | 3:1                    |
| 6     | 6-Cl (1f)  | 168  | 42 (3fa)                 | >99                    | 5:1                    |
| 7     | 1h         | 192  | - (3ha)                  | <5                     | -                      |
| 8     | 1i         | 192  | - (3ia)                  | <5                     | -                      |
| 9     | 1j         | 192  | - (3ja)                  | <5                     | -                      |

<sup>a</sup> Reaction conditions: Indole **1** (1.0 eq.) and cyclopropane **2a** (1.2 eq.), was treated with Ni(OTf)<sub>2</sub> (10 mol%) in DCE (0.1 M) at rt and time (h). <sup>b</sup> Isolated yield. <sup>c</sup> Based on recovery of starting material. <sup>d</sup> Calculated from the <sup>1</sup>H NMR. <sup>e</sup> 24 h rt, then 24 h at 50 °C.

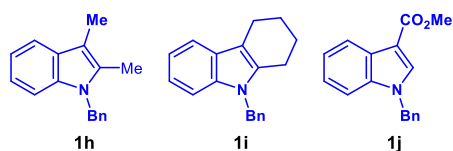

**Table S4:** Screening of ligands.<sup>a</sup>

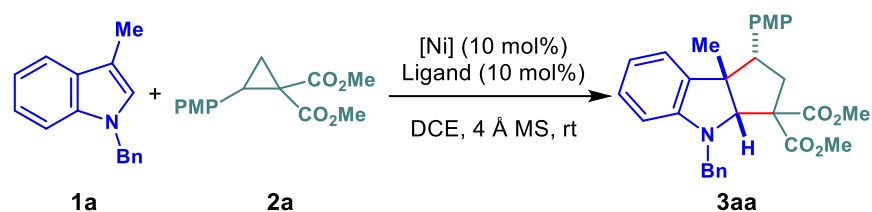

| Entry | [Ni]                                                  | Ligand                                          | T (°C) | t (h) | Yield (%) <sup>b</sup> | Conv.(%) <sup>c</sup> | dr <sup>d</sup> |
|-------|-------------------------------------------------------|-------------------------------------------------|--------|-------|------------------------|-----------------------|-----------------|
| 1     | Ni(OTf) <sub>2</sub>                                  | Bipy                                            | rt     | 144   | -                      | <5                    | -               |
| 2     | Ni(OTf) <sub>2</sub>                                  | Phen                                            | 85     | 72    | 12                     | 26                    | 1:1             |
| 3     | Ni(OTf) <sub>2</sub>                                  | dppe                                            | rt     | 144   | - <sup>e</sup>         | 7.5                   | -               |
| 4     | Ni(OTf) <sub>2</sub>                                  | d <sup>F</sup> ppe                              | rt     | 144   | 13                     | 24                    | 4:1             |
| 5     | Ni(OTf) <sub>2</sub>                                  | L <sub>2</sub> -PrPr <sub>2</sub>               | 50     | 72    | - <sup>e</sup>         | <5                    | -               |
| 6     | Ni(OTf) <sub>2</sub>                                  | L <sub>3</sub> -PrPr <sub>2</sub>               | 50     | 72    | - <sup>e</sup>         | <5                    | -               |
| 7     | Ni(ClO <sub>4</sub> ) <sub>2</sub> ·6H <sub>2</sub> O | Phen                                            | rt     | 96    | 16                     | 63                    | 4.4:1           |
| 8     | Ni(ClO <sub>4</sub> ) <sub>2</sub> ·6H <sub>2</sub> O | dppe                                            | rt     | 96    | 19                     | -                     | 5.7:1           |
| 9     | Ni(ClO <sub>4</sub> ) <sub>2</sub> ·6H <sub>2</sub> O | d <sup>F</sup> ppe                              | rt     | 168   | 43                     | -                     | 5.5:1           |
| 10    | Ni(ClO <sub>4</sub> ) <sub>2</sub> ·6H <sub>2</sub> O | (C <sub>6</sub> F <sub>5</sub> ) <sub>3</sub> P | rt     | 168   | -                      | <5                    | -               |
| 11    | Ni(ClO <sub>4</sub> ) <sub>2</sub> ·6H <sub>2</sub> O | dppBz                                           | rt     | 120   | 53                     | 70                    | 5.5:1           |
| 12    | Ni(ClO <sub>4</sub> ) <sub>2</sub> ·6H <sub>2</sub> O | dppf                                            | rt     | 144   | -                      | <5                    | -               |
| 13    | Ni(ClO <sub>4</sub> ) <sub>2</sub> ·6H <sub>2</sub> O | rac-BINAP                                       | rt     | 5     | 73                     | >99                   | 6:1             |
| 14    | Ni(OTf) <sub>2</sub>                                  | rac-BINAP                                       | rt     | 96    | -                      | <5                    | -               |
| 15    | Ni(ClO <sub>4</sub> ) <sub>2</sub> ·6H <sub>2</sub> O | rac-BINAP                                       | 50     | 5     | 52                     | >99                   |                 |
| 16    | Ni(ClO <sub>4</sub> ) <sub>2</sub> ·6H <sub>2</sub> O | rac-BINAP                                       | 80     | 5     | 28                     | >99                   |                 |

<sup>a</sup> Reaction conditions: Indole **1a** (1.0 eq.) and cyclopropane **2a** (1.2 eq.), was treated with [Ni] (10 mol%) and ligand (10 mol%) in DCE (0.1 M) at rt and time (h). <sup>b</sup> Isolated yield. <sup>c</sup> Based on recovery of starting material. <sup>d</sup> Calculated from the <sup>1</sup>H NMR. <sup>e</sup> complex mixture.

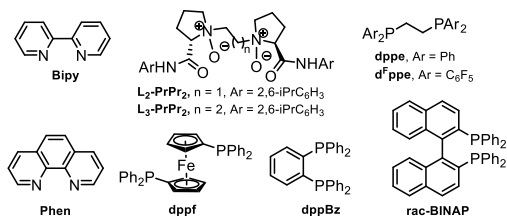

**Table S5:** Screening of chiral ligands.<sup>a</sup>

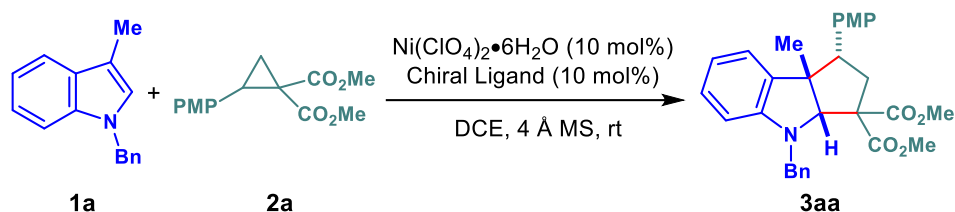

| Entry | Chiral Ligand    | t (h) | Yield (%) <sup>b</sup> | Conv.(%) <sup>c</sup> | <i>dr</i> <sup>d</sup> | <i>ee</i> (%) <sup>e</sup> |
|-------|------------------|-------|------------------------|-----------------------|------------------------|----------------------------|
| 1     | (R)-BINAP        | 20    | 76                     | >99                   | 5.7:1                  | 7.1                        |
| 2     | (R)-DM-BINAP     | 20    | 81                     | >99                   | 6.2:1                  | 39.1                       |
| 3     | (S)-DTBM-SEGPHOS | 24    | 36                     | 59                    | 5.2:1                  | 12.5                       |

<sup>a</sup> Reaction conditions: Indole **1a** (1.0 eq.) and cyclopropane **2a** (1.2 eq.), was treated with  $\text{Ni}(\text{ClO}_4)_2 \cdot 6\text{H}_2\text{O}$  (10 mol%) and chiral ligand (10 mol%) in DCE (0.1 M) at rt and time (h). <sup>b</sup> Isolated yield. <sup>c</sup> Based on recovery of starting material. <sup>d</sup> Calculated from the  $^1\text{H}$  NMR. <sup>e</sup> complex mixture.

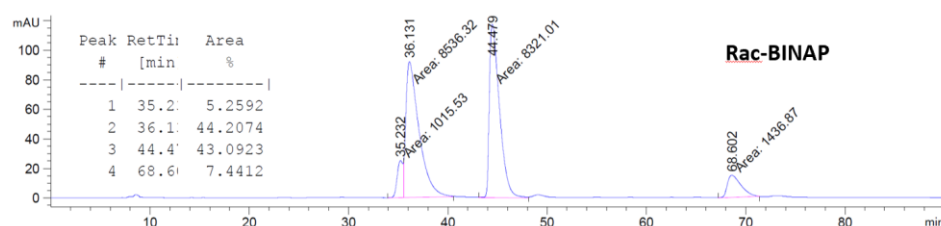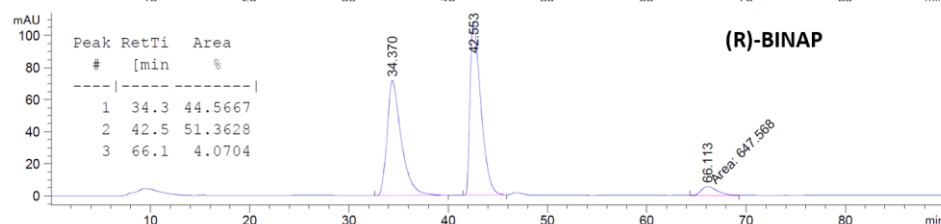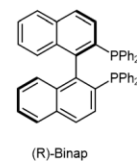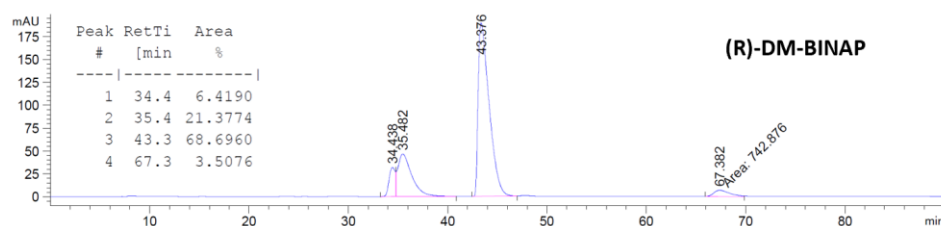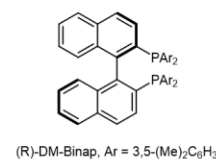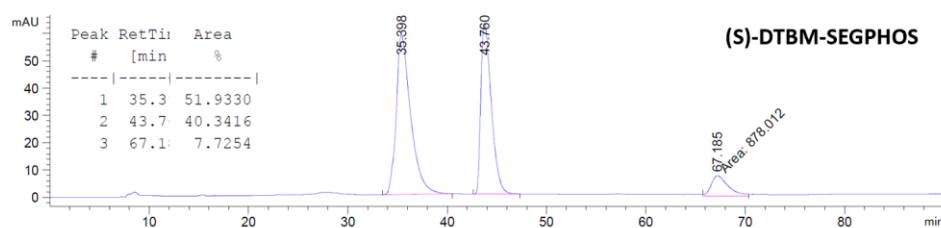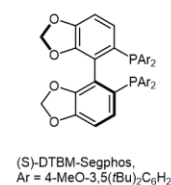

**4. General procedure for [3+2] cycloaddition (exemplified for the synthesis of dimethyl (1*S*\*,3*aR*\*,8*bS*\*)-4-benzyl-1-(4-methoxyphenyl)-8*b*-methyl-1,3*a*,4,8*b*-tetrahydrocyclopenta[*b*]indole-3,3(2*H*)-dicarboxylate (**3aa**)):**

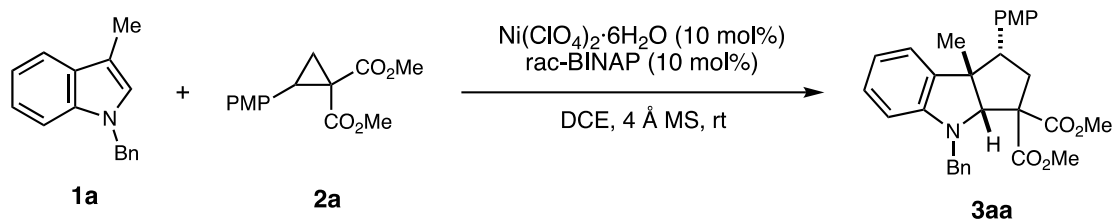

A solution of *N*-benzylskatole **1a** (20 mg, 90.37  $\mu\text{mol}$ , 1.0 eq), cyclopropane **2a** (28.7 mg, 108.45  $\mu\text{mol}$ , 1.2 eq),  $\text{Ni}(\text{ClO}_4)_2 \cdot 6\text{H}_2\text{O}$  (1.65 mg, 4.52  $\mu\text{mol}$ , 10 mol%), *rac*-BINAP (2.81 mg, 4.52  $\mu\text{mol}$ , 10 mol%) and 400 mg of 4 Å molecular sieves in dry DCE (903  $\mu\text{L}$ , 0.1 M), were stirred under a nitrogen atmosphere at room temperature for 5 h. After completing the reaction, as indicated by TLC, the mixture was filtered through celite® and washed AcOEt (50 mL). The filtrate was concentrated and purified by flash chromatography ( $\text{SiO}_2$ , 63-200  $\mu\text{m}$ , 10% AcOEt/hexane) to afford cyclopenta[*b*]indole **3aa** (32 mg, 73% yield) as a colorless oil (*dr*=6:1). **IR (KBr,  $\text{cm}^{-1}$ )  $\nu$ :** 2994, 2950, 2834, 1731, 1599, 1514, 1275.  **$^1\text{H}$ -NMR:** (500 MHz,  $\text{CDCl}_3$ )  $\delta$  7.24 – 7.17 (m, 2.43H), 7.17 – 7.10 (m, 2.76H), 7.05 (t,  $J$  = 9.5 Hz, 0.57H), 6.95 (t,  $J$  = 7.7 Hz, 0.20H), 6.90 – 6.78 (m, 2H), 6.73 (d,  $J$  = 8.2 Hz, 1.84H), 6.63 (d,  $J$  = 7.2 Hz, 0.14H), 6.59 (t,  $J$  = 7.3 Hz, 0.14H), 6.36 (d,  $J$  = 8.0 Hz, 0.14H), 6.32 (d,  $J$  = 7.9 Hz, 0.86H), 6.28 (t,  $J$  = 7.4 Hz, 0.86H), 5.47 (d,  $J$  = 7.5 Hz, 0.86H), 4.58 (d,  $J$  = 16.5 Hz, 0.18H), 4.55 – 4.49 (m, 1.78H), 4.25 (d,  $J$  = 16.3 Hz, 0.16H), 4.08 (d,  $J$  = 16.1 Hz, 0.89H), 3.75 (s, 0.5H), 3.73 (s, 2.79H), 3.71 (s, 0.36H), 3.69 (s, 2.52H), 3.39 (s, 2.56H), 3.34 (s, 0.44H), 2.90 (dd,  $J$  = 14.8, 4.6 Hz, 0.82H), 2.68 (dd,  $J$  = 14.8, 12.7 Hz, 0.90H), 2.60 (dd,  $J$  = 13.1, 5.7 Hz, 0.16H), 2.30 (t,  $J$  = 13.3 Hz, 0.21H), 2.26 – 2.21 (m, 0.94H), 1.26 (s, 2.82H), 1.18 (s, 1.53H).  **$^{13}\text{C}$ -NMR:** (126 MHz,  $\text{CDCl}_3$ )  $\delta$  172.84, 171.97, 169.21, 158.79, 153.45, 150.88, 138.77, 138.62, 137.21, 133.00, 130.82, 130.44, 130.08, 129.75, 128.45, 128.37, 127.86, 127.85, 127.76, 127.59, 127.05, 126.89, 125.95, 118.39, 118.21, 114.14, 113.99, 113.73, 113.50, 113.25, 109.67, 109.54, 82.33, 80.19, 65.30, 64.12, 57.57, 56.66, 55.39, 55.37, 55.13, 53.74, 53.41, 52.90, 52.55, 52.44, 39.36, 36.87, 29.83, 28.15. **HRMS-ESI:** Calculated for  $\text{C}_{30}\text{H}_{32}\text{NO}_5$   $[\text{M}+\text{H}]^+ = 486.2275$ , Found: 486.2286.



NMR data of the major isomer deduced from the 6:1 mixture: **<sup>1</sup>H-NMR:** (500 MHz, CDCl<sub>3</sub>) δ 7.24 – 7.09 (m, 6H), 6.89 – 6.78 (m, 2H), 6.73 (d, *J* = 8.3 Hz, 2H), 6.34 – 6.25 (m, 2H), 5.47 (d, *J* = 7.5 Hz, 1H), 4.52 (d, 2H), 4.08 (d, *J* = 16.1 Hz, 1H), 3.73 (s, 3H), 3.69 (s, 3H), 3.39 (s, 3H), 2.90 (dd, *J* = 14.8, 4.6 Hz, 1H), 2.73 – 2.63 (m, 1H), 2.23 (dd, *J* = 13.0, 4.4 Hz, 1H), 1.26 (s, 3H). **<sup>13</sup>C-NMR:** (126 MHz, CDCl<sub>3</sub>) δ 171.97, 169.21, 158.79, 153.45, 138.77, 133.00, 130.44, 130.08, 128.45, 128.37, 127.86, 127.83, 127.76, 127.59, 127.05, 125.95, 118.21, 113.73, 113.50, 113.25, 109.67, 80.19, 65.30, 57.57, 56.66, 55.39, 55.37, 52.90, 52.55, 52.44, 36.87, 29.83, 28.15. The spectroscopic data agree with the literature.<sup>5</sup>

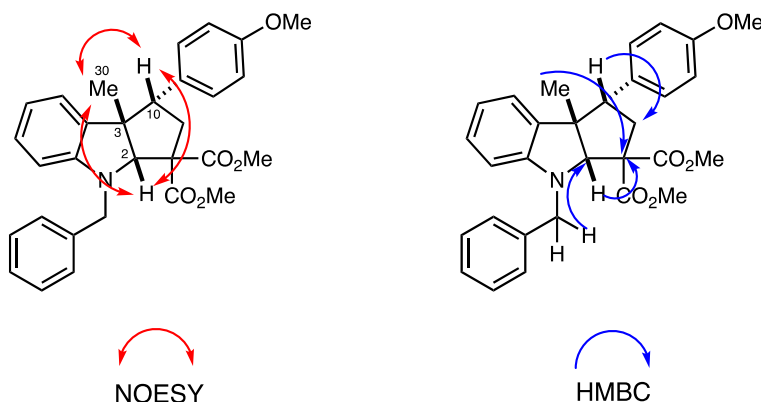

**Figure 1:** NOESY and HMBC observed for (3aa).

**Dimethyl (1*S*\*,3*aR*\*,8*bS*\*)-4-benzyl-8*b*-methyl-1-phenyl-1,3*a*,4,8*b*-tetrahydrocyclopenta[*b*]indole-3,3(2*H*)-dicarboxylate (3ab):**

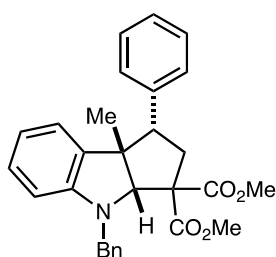

Colorless oil (90%, *dr* = 4.8:1). **IR (KBr, cm<sup>-1</sup>)** *v*: 3026, 2949, 2849, 1731, 1599, 1484, 1452, 1264, 698. **<sup>1</sup>H-NMR:** (700 MHz, CDCl<sub>3</sub>) δ 7.34 (t, *J* = 7.4 Hz, 0.74H), 7.32 – 7.25 (m, 3.26H), 7.24 – 7.21 (m, 1.38H), 7.21 – 7.18 (m, 1.69H), 7.08 – 7.01 (m, 1.67H), 7.02 (s, 0.21H), 6.91 (td, *J* = 7.6, 1.3 Hz, 0.95H), 6.72 (dd, *J* = 7.4, 1.4 Hz, 0.30H), 6.68 (d, *J* = 7.3 Hz, 0.32H), 6.45 (d, *J* = 8.0 Hz, 0.33H), 6.40 (d, *J* = 7.9 Hz, 0.81H), 6.35 – 6.30 (m, 0.85H), 5.49 – 5.44 (m, 0.74H), 4.71 (s, 0.26H), 4.66 (d, *J* = 16.3 Hz, 0.43H), 4.63 (d, *J* = 1.5 Hz, 0.71H), 4.60 (d, *J* = 16.1 Hz, 0.79H), 4.34 (d, *J* = 16.3 Hz, 0.35H), 4.16 (d, *J* = 16.0 Hz, 0.80H), 3.81 (s, 0.81H), 3.78 (s, 2.22H), 3.47 (s, 2.22H), 3.42 (s, 0.72H), 3.02 (dd, *J* = 14.8, 4.7 Hz, 0.79H), 2.82 (dd, *J* = 14.9, 12.8 Hz, 0.88H), 2.71 (dd, *J* = 13.1, 5.8 Hz, 0.37H), 2.44 (t, *J* = 13.4 Hz, 0.42H), 2.37 – 2.32 (m, 1H), 1.37 (s, 2.15H), 0.94 (s,

0.87H). **<sup>13</sup>C-NMR:** (176 MHz, CDCl<sub>3</sub>) δ 172.70, 171.84, 170.28, 170.22, 169.04, 167.07, 153.34, 150.77, 138.73, 138.65, 138.49, 138.27, 136.95, 134.61, 132.77, 129.10, 129.07, 128.64, 128.61, 128.46, 128.43, 128.35, 128.28, 128.27, 128.25, 128.20, 127.99, 127.80, 127.76, 127.64, 127.58, 127.46, 127.43, 127.34, 127.01, 126.94, 126.91, 126.78, 125.79, 125.68, 124.85, 122.79, 118.30, 118.07, 109.60, 109.45, 82.28, 80.18, 65.20, 64.06, 57.55, 56.60, 55.08, 53.97, 53.61, 53.14, 52.83, 52.81, 52.58, 52.46, 52.36, 52.23, 38.99, 36.44, 32.59, 29.72, 28.06, 22.92, 19.14. **HRMS-ESI:** Calculated for C<sub>29</sub>H<sub>30</sub>NO<sub>4</sub> [M+H]<sup>+</sup> = 456.2169, Found: 456.2181.

NMR data of the major isomer deduced from the 4.8:1 mixture: **<sup>1</sup>H-NMR:** (700 MHz, CDCl<sub>3</sub>) δ 7.32 – 7.25 (m, 4H), 7.24 – 7.21 (m, 2H), 7.21 – 7.18 (m, 2H), 7.08 – 7.01 (m, 2H), 6.91 (td, *J* = 7.6, 1.3 Hz, 1H), 6.40 (d, *J* = 7.9 Hz, 1H), 6.35 – 6.30 (m, 1H), 5.49 – 5.44 (m, 1H), 4.63 (d, *J* = 1.5 Hz, 1H), 4.60 (d, *J* = 16.1 Hz, 1H), 4.16 (d, *J* = 16.0 Hz, 1H), 3.78 (s, 3H), 3.47 (s, 3H), 3.02 (dd, *J* = 14.8, 4.7 Hz, 1H), 2.82 (dd, *J* = 14.9, 12.8 Hz, 1H), 2.37 – 2.32 (m, 1H), 1.37 (s, 3H). **<sup>13</sup>C-NMR:** (176 MHz, CDCl<sub>3</sub>) δ 171.84, 169.04, 153.34, 138.65, 138.27, 132.77, 129.10, 129.07, 128.46, 128.35, 128.27, 128.20, 127.99, 127.80, 127.76, 127.64, 127.46, 127.01, 126.94, 126.78, 125.68, 122.79, 118.30, 118.07, 109.60, 109.45, 80.18, 65.20, 57.55, 56.60, 53.14, 52.83, 52.81, 52.36, 36.44, 28.06. The spectroscopic data agree with the literature.<sup>5</sup>

**Dimethyl (1*S*\*,3*aR*\*,8*bS*\*)-4-benzyl-1-(4-chlorophenyl)-8*b*-methyl-1,3*a*,4,8*b*-tetrahydrocyclopenta[*b*]indole-3,3(2*H*)-dicarboxylate (3*ac*):**

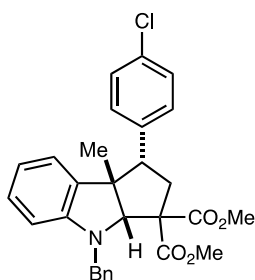

White solid (86%, *dr* = 4:1). **mp:** 117–120 °C. **IR (KBr, cm<sup>-1</sup>)** *ν*: 3026, 2949, 2849, 1731, 1599, 1484, 1452, 1264, 698. **<sup>1</sup>H-NMR:** (700 MHz, CDCl<sub>3</sub>) δ 7.34 – 7.25 (m, 3H), 7.23 (d, *J* = 8.2 Hz, 2H), 7.18 (d, *J* = 7.7 Hz, 1.39H), 7.04 (d, *J* = 7.7 Hz, 0.41H), 7.00 – 6.91 (m, 1.42H), 6.45 (d, *J* = 8.0 Hz, 0.24H), 6.41 (d, *J* = 8.0 Hz, 0.70H), 6.38 (t, *J* = 7.4 Hz, 0.69H), 5.53 (d, *J* = 7.5 Hz, 0.76H), 4.71 (s, 0.19H), 4.65 (d, *J* = 16.3 Hz, 0.30H), 4.62 (s, 0.68H), 4.59 (d, *J* = 16.1 Hz, 0.71H), 4.32 (d, *J* = 16.3 Hz, 0.22H), 4.15 (d, *J* = 16.1 Hz, 0.76H), 3.81 (s, 0.57H), 3.78 (s, 2.08H), 3.47 (s, 2.11H), 3.42 (s, 0.58H), 2.98 (dd, *J* = 14.8, 4.7 Hz, 0.75H), 2.76 (dd, *J* = 14.7, 12.8 Hz, 0.82H), 2.69 (dd, *J* = 13.1, 5.7 Hz, 0.22H), 2.39 (d, *J* = 13.5 Hz, 0.27H), 2.31 (dd, *J* = 12.8, 4.7 Hz, 0.75H), 1.34 (s,

2.18H), 0.93 (s, 0.58H). **<sup>13</sup>C-NMR:** (176 MHz, CDCl<sub>3</sub>) δ 172.65, 171.84, 170.25, 169.03, 153.50, 150.95, 138.65, 138.51, 137.31, 136.97, 136.68, 132.94, 132.90, 132.51, 130.52, 130.45, 129.04, 128.79, 128.56, 128.50, 128.41, 128.28, 128.12, 128.07, 128.02, 127.93, 127.74, 127.58, 127.16, 127.12, 126.95, 125.87, 125.73, 124.98, 122.73, 122.19, 119.44, 118.63, 118.54, 118.37, 109.91, 109.81, 109.60, 82.38, 80.20, 65.27, 64.09, 57.63, 56.75, 55.18, 53.90, 53.56, 53.00, 52.82, 52.79, 52.69, 52.65, 52.53, 49.71, 47.05, 39.13, 36.74, 32.08, 29.85, 29.81, 28.07, 22.84, 22.72. **HRMS-ESI:** Calculated for C<sub>29</sub>H<sub>29</sub>ClNO<sub>4</sub> [M+H]<sup>+</sup> = 490.1780, Found: 490.1796.

NMR data of the major isomer deduced from the 4:1 mixture: **<sup>1</sup>H-NMR:** (700 MHz, CDCl<sub>3</sub>) δ 7.34 – 7.25 (m, 4H), 7.23 (d, *J* = 8.2 Hz, 3H), 7.18 (d, *J* = 7.7 Hz, 2H), 7.00 – 6.91 (m, 1H), 6.41 (d, *J* = 8.0 Hz, 1H), 6.38 (t, *J* = 7.4 Hz, 1H), 5.53 (d, *J* = 7.5 Hz, 1H), 4.62 (s, 1H), 4.59 (d, *J* = 16.1 Hz, 1H), 4.15 (d, *J* = 16.1 Hz, 1H), 3.78 (s, 3H), 3.47 (s, 3H), 2.98 (dd, *J* = 14.8, 4.7 Hz, 1H), 2.76 (dd, *J* = 14.7, 12.8 Hz, 1H), 2.31 (dd, *J* = 12.8, 4.7 Hz, 1H), 1.34 (s, 3H). **<sup>13</sup>C-NMR:** (176 MHz, CDCl<sub>3</sub>) δ 171.72, 168.90, 153.37, 138.52, 136.85, 132.81, 132.38, 130.39, 130.32, 128.67, 128.37, 128.28, 128.15, 127.99, 127.89, 127.62, 127.46, 126.99, 125.60, 118.24, 109.79, 80.07, 65.14, 57.50, 56.62, 52.87, 52.69, 52.41, 36.61, 27.94.

Further confirmation of the structure of **3ac** was obtained by X-ray crystallography (CCDC: 2302398) of single crystals obtained from hexane/EtOAc (9:1) mixture.

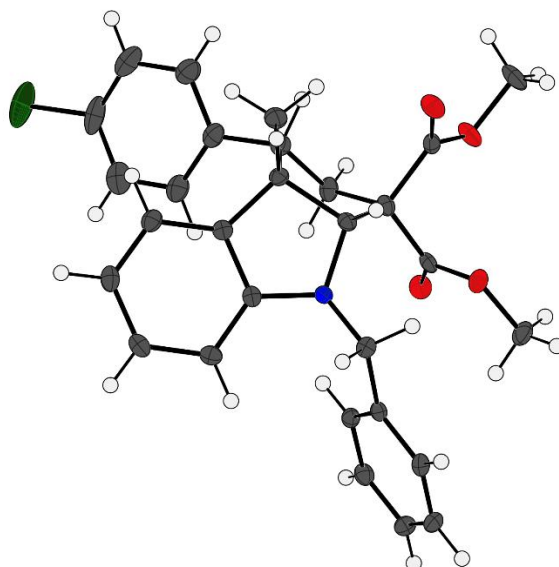

**Dimethyl (1*S*\*,3*aR*\*,8*bS*\*)-4-benzyl-1-(4-bromophenyl)-8*b*-methyl-1,3*a*,4,8*b*-tetrahydrocyclopenta[*b*]indole-3,3(2*H*)-dicarboxylate (3*ad*):**

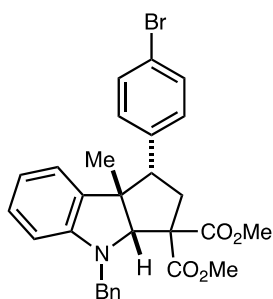

Yellow solid (83%., *dr* = 3:1). **IR** (KBr,  $\text{cm}^{-1}$ )  $\nu$ : 2945, 2913, 2863, 1731, 1594, 1487, 1271, 756.  **$^1\text{H-NMR}$** : (700 MHz,  $\text{CDCl}_3$ )  $\delta$  7.48 – 7.45 (m, 0.32H), 7.38 (d,  $J$  = 8.2 Hz, 1.59H), 7.31 – 7.25 (m, 1.76H), 7.24 – 7.21 (m, 0.85H), 7.18 (d,  $J$  = 7.7 Hz, 1.45H), 7.09 (dd,  $J$  = 8.4, 1.6 Hz, 0.30H), 7.08 – 7.06 (m, 0.17H), 7.04 (dd,  $J$  = 8.3, 5.2 Hz, 0.23H), 6.99 (d,  $J$  = 8.0 Hz, 0.11H), 6.94 (t,  $J$  = 7.8 Hz, 0.68H), 6.90 (d,  $J$  = 7.9 Hz, 1.09H), 6.80 (s, 0.16H), 6.68 – 6.67 (m, 0.28H), 6.45 (d,  $J$  = 8.1 Hz, 0.17H), 6.41 (d,  $J$  = 8.0 Hz, 0.58H), 6.38 (t,  $J$  = 7.4 Hz, 0.60H), 5.54 (d,  $J$  = 7.5 Hz, 0.54H), 4.71 (d,  $J$  = 1.5 Hz, 0.16H), 4.65 (d,  $J$  = 16.2 Hz, 0.18H), 4.62 (s, 0.58H), 4.59 (d,  $J$  = 16.0 Hz, 0.64H), 4.32 (d,  $J$  = 16.3 Hz, 0.17H), 4.15 (d,  $J$  = 16.0 Hz, 0.62H), 3.81 (s, 0.51H), 3.78 (s, 2.05H), 3.47 (d,  $J$  = 1.7 Hz, 1.84H), 3.42 (s, 0.64H), 2.97 (dd,  $J$  = 14.7, 4.6 Hz, 0.68H), 2.75 (t,  $J$  = 12.9 Hz, 0.70H), 2.69 (dd,  $J$  = 13.1, 5.5 Hz, 0.17H), 2.39 (d,  $J$  = 13.5 Hz, 0.15H), 2.31 (dd,  $J$  = 12.8, 4.6 Hz, 0.64H), 1.34 (s, 1.87H), 0.93 (s, 0.45H).  **$^{13}\text{C-NMR}$** : (176 MHz,  $\text{CDCl}_3$ )  $\delta$  172.63, 171.83, 170.23, 169.01, 153.49, 150.95, 138.63, 138.50, 137.83, 137.49, 136.65, 132.47, 131.74, 131.47, 131.23, 130.96, 130.91, 130.84, 130.33, 129.41, 128.80, 128.55, 128.50, 128.47, 128.41, 128.13, 128.08, 127.93, 127.74, 127.58, 127.50, 127.12, 126.95, 125.87, 125.73, 122.73, 121.06, 121.02, 118.55, 118.39, 109.92, 109.82, 82.38, 80.18, 65.27, 64.08, 57.59, 56.74, 55.14, 53.90, 53.62, 53.04, 53.00, 52.89, 52.69, 52.66, 52.56, 52.53, 49.70, 39.05, 36.69, 31.95, 29.85, 28.06, 22.71. **HRMS-ESI**: Calculated for  $\text{C}_{29}\text{H}_{29}\text{BrNO}_4$   $[\text{M}+\text{H}]^+ = 534.1274$ , Found: 534.1257.

NMR data of the major isomer deduced from the 3:1 mixture:  **$^1\text{H-NMR}$** : (700 MHz,  $\text{CDCl}_3$ )  $\delta$  7.38 (d,  $J$  = 8.2 Hz, 2H), 7.31 – 7.25 (m, 3H), 7.24 – 7.21 (m, 1H), 7.18 (d,  $J$  = 7.7 Hz, 2H), 6.94 (t,  $J$  = 7.8 Hz, 1H), 6.90 (d,  $J$  = 7.9 Hz, 1H), 6.41 (d,  $J$  = 8.0 Hz, 1H), 6.38 (t,  $J$  = 7.4 Hz, 1H), 5.54 (d,  $J$  = 7.5 Hz, 1H), 4.62 (s, 1H), 4.59 (d,  $J$  = 16.0 Hz, 1H), 4.15 (d,  $J$  = 16.0 Hz, 1H), 3.78 (d,  $J$  = 1.6 Hz, 3H), 3.47 (s, 3H), 2.97 (dd,  $J$  = 14.7, 4.6 Hz, 1H), 2.75 (t,  $J$  = 12.9 Hz, 1H), 2.31 (dd,  $J$  = 12.8, 4.6 Hz, 1H), 1.34 (s, 3H).  **$^{13}\text{C-NMR}$** : (176 MHz,  $\text{CDCl}_3$ )  $\delta$  171.83, 169.01, 153.49, 138.63, 137.49, 132.47, 131.23, 130.96, 130.91, 130.84, 128.50,

128.41, 128.13, 127.74, 127.58, 127.12, 125.73, 121.06, 118.39, 109.92, 80.18, 65.27, 57.59, 56.74, 53.00, 52.89, 52.53, 36.69, 28.06.

**Dimethyl (1*S*\*,3*aR*\*,8*bS*\*)-4-benzyl-1-(4-fluorophenyl)-8*b*-methyl-1,3*a*,4,8*b*-tetrahydrocyclopenta[*b*]indole-3,3(2*H*)-dicarboxylate (3*ae*):**

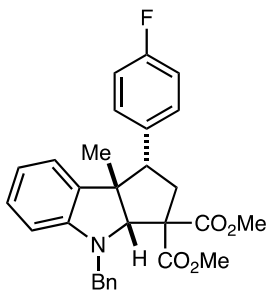

White solid (59%, *dr* = 3.7:1). **IR** (KBr,  $\text{cm}^{-1}$ )  $\nu$ : 2995, 2995, 2920, 2848, 1731, 1600, 1513, 1273, 1222.  **$^1\text{H-NMR}$** : (700 MHz,  $\text{CDCl}_3$ )  $\delta$  7.31 – 7.27 (m, 1.70H), 7.22 (t,  $J$  = 7.3 Hz, 0.91H), 7.20 – 7.15 (m, 3.11H), 7.11 (d,  $J$  = 7.7 Hz, 0.43H), 7.03 (t,  $J$  = 8.4 Hz, 0.68H), 6.96 (dd,  $J$  = 9.8, 7.5 Hz, 3.59H), 6.94 – 6.89 (m, 1.25H), 6.69 – 6.65 (m, 0.34H), 6.45 (d,  $J$  = 8.0 Hz, 0.31H), 6.40 (d,  $J$  = 8.0 Hz, 0.68H), 6.36 (td,  $J$  = 7.2, 2.9 Hz, 0.70H), 5.49 (d,  $J$  = 7.0 Hz, 0.64H), 4.71 (s, 0.23H), 4.65 (d,  $J$  = 16.3 Hz, 0.38H), 4.62 (s, 0.56H), 4.59 (d,  $J$  = 16.0 Hz, 0.68H), 4.32 (d,  $J$  = 16.3 Hz, 0.36H), 4.15 (d,  $J$  = 16.1 Hz, 0.74H), 3.81 (s, 0.49H), 3.79 (s, 2.26H), 3.42 (s, 0.49H), 3.39 (s, 2.26H), 2.99 (dd,  $J$  = 14.8, 4.6 Hz, 0.73H), 2.75 (dd,  $J$  = 14.8, 12.8 Hz, 0.78H), 2.69 (dd,  $J$  = 13.1, 5.6 Hz, 0.35H), 2.37 (t,  $J$  = 13.5 Hz, 0.39H), 2.35 – 2.29 (m, 0.79H), 1.34 (s, 1.58H), 0.92 (s, 0.53H).  **$^{13}\text{C-NMR}$** : (176 MHz,  $\text{CDCl}_3$ )  $\delta$  171.88, 170.26, 169.08, 167.11, 162.29 (d,  $J$  = 246.13 Hz), 162.18 (d,  $J$  = 245.07 Hz), 153.53, 138.69, 134.15, 132.65, 130.30 (d,  $J$  = 8.17 Hz), 128.50, 128.41, 128.06, 128.02, 127.75, 127.58, 127.11, 126.94, 125.74, 118.51, 118.31, 115.27 (d,  $J$  = 21.59 Hz), 114.70 (d,  $J$  = 21.00 Hz), 109.87, 109.77, 82.37, 80.21, 65.26, 64.08, 57.61, 56.76, 53.88, 53.42, 53.00, 52.99, 52.66, 52.64, 52.52, 52.46, 37.23, 36.87, 31.91, 29.86, 28.07, 19.39. **HRMS-ESI**: Calculated for  $\text{C}_{29}\text{H}_{29}\text{FNO}_4$   $[\text{M}+\text{H}]^+ = 474.2075$ , Found: 474.2052.

NMR data of the major isomer deduced from the 3.7:1 mixture:  **$^1\text{H-NMR}$** : (700 MHz,  $\text{CDCl}_3$ )  $\delta$  7.30 – 7.27 (m, 2H), 7.20 – 7.14 (m, 4H), 6.96 (t,  $J$  = 8.6 Hz, 4H), 6.40 (d,  $J$  = 8.0 Hz, 1H), 6.36 (t,  $J$  = 7.2 Hz, 1H), 5.51 – 5.48 (m, 1H), 4.62 (s, 1H), 4.59 (d,  $J$  = 16.0 Hz, 1H), 4.15 (d,  $J$  = 16.1 Hz, 1H), 3.79 (s, 3H), 3.39 (s, 3H), 2.99 (dd,  $J$  = 14.8, 4.6 Hz, 1H), 2.75 (dd,  $J$  = 14.8, 12.8 Hz, 1H), 2.35 – 2.28 (m, 1H), 1.34 (s, 3H).  **$^{13}\text{C-NMR}$** : (176 MHz,  $\text{CDCl}_3$ )  $\delta$  171.88, 170.26, 169.08, 167.11, 162.29 (d,  $J$  = 246.1 Hz), 153.53, 138.69, 132.65, 130.47, 130.45, 130.30 (d,  $J$  = 8.2 Hz), 128.50, 128.06, 127.75, 127.58, 127.11, 125.74,

118.31, 115.27 (d,  $J = 21.6$  Hz), 114.76, 114.64, 109.87, 80.21, 65.26, 57.61, 56.76, 53.00, 52.99, 52.66, 52.52, 52.46, 37.23, 36.87, 31.91, 28.07, 19.39.

**Dimethyl (1*S*\*,3*aR*\*,8*bS*\*)-4-benzyl-1-(4-nitrophenyl)-8*b*-methyl-1,3*a*,4,8*b*-tetrahydrocyclopenta[*b*]indole-3,3(2*H*)-dicarboxylate (3*ag*):**

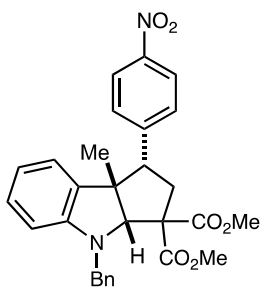

Yellow solid (51%,  $dr = 3.5:1$ ) **mp**: 134-140 °C.. **IR** (KBr,  $\text{cm}^{-1}$ )  $\nu$ : 3077, 3022, 2948, 1728, 1599, 1515, 1346.  **$^1\text{H-NMR}$** : (700 MHz,  $\text{CDCl}_3$ )  $\delta$  8.15 (d,  $J = 8.5$  Hz, 1.61H), 8.12 (d,  $J = 8.3$  Hz, 1.15H), 7.36 (d,  $J = 8.3$  Hz, 1.77H), 7.29 (t,  $J = 7.5$  Hz, 1.81H), 7.23 (t,  $J = 7.4$  Hz, 1.22H), 7.18 (t,  $J = 5.9$  Hz, 2.85H), 6.97 – 6.92 (m, 0.79H), 6.70 (t,  $J = 7.4$  Hz, 0.22H), 6.63 (d,  $J = 7.4$  Hz, 0.18H), 6.48 (d,  $J = 8.0$  Hz, 0.20H), 6.44 (d,  $J = 8.0$  Hz, 0.73H), 6.34 (t,  $J = 7.4$  Hz, 0.71H), 5.44 (d,  $J = 7.5$  Hz, 0.59H), 4.73 (s, 0.17H), 4.66 (d,  $J = 16.6$  Hz, 0.30H), 4.64 (s, 0.62H), 4.60 (d,  $J = 16.0$  Hz, 0.76H), 4.32 (d,  $J = 16.3$  Hz, 0.23H), 4.15 (d,  $J = 16.0$  Hz, 0.78H), 3.83 (s, 0.71H), 3.81 (s, 2.34H), 3.53 (s, 0.34H), 3.42 (s, 2.69H), 3.12 (dd,  $J = 14.7, 4.8$  Hz, 0.71H), 2.83 (dd,  $J = 14.7, 12.8$  Hz, 0.85H), 2.74 (dd,  $J = 13.0, 5.5$  Hz, 0.26H), 2.45 (t,  $J = 13.4$  Hz, 0.28H), 2.39 – 2.34 (m, 0.78H), 1.38 (s, 2.16H), 0.94 (s, 0.49H).  **$^{13}\text{C-NMR}$** : (176 MHz,  $\text{CDCl}_3$ )  $\delta$  171.63, 170.09, 169.68, 168.78, 166.65, 153.55, 147.39, 147.26, 147.23, 146.51, 142.60, 138.44, 131.89, 130.06, 129.92, 129.49, 128.78, 128.55, 128.53, 128.48, 128.45, 128.41, 127.73, 127.57, 127.31, 127.22, 127.04, 125.87, 125.28, 124.97, 123.80, 123.56, 123.33, 123.04, 122.59, 119.69, 118.78, 118.73, 118.51, 110.28, 110.16, 82.37, 80.21, 65.28, 64.14, 58.07, 56.82, 55.60, 54.04, 54.00, 53.44, 53.25, 53.11, 52.91, 52.80, 52.78, 52.74, 52.70, 52.64, 49.57, 47.11, 38.97, 37.86, 36.70, 31.71, 29.84, 29.81, 28.03, 22.55, 19.49, 9.79, 1.16. **HRMS-ESI**: Calculated for  $\text{C}_{29}\text{H}_{29}\text{N}_2\text{O}_6$   $[\text{M}+\text{H}]^+ = 501.2020$ , Found: 501.1997.

NMR data of the major isomer deduced from the 3.5:1 mixture:  **$^1\text{H-NMR}$** : (700 MHz,  $\text{CDCl}_3$ )  $\delta$  8.15 (d,  $J = 8.5$  Hz, 2H), 7.36 (d,  $J = 8.3$  Hz, 2H), 7.29 (t,  $J = 7.5$  Hz, 2H), 7.18 (t,  $J = 5.9$  Hz, 3H), 6.97 – 6.92 (m, 1H), 6.44 (d,  $J = 8.0$  Hz, 1H), 6.34 (t,  $J = 7.4$  Hz, 1H), 5.44 (d,  $J = 7.5$  Hz, 1H), 4.64 (s, 1H), 4.60 (d,  $J = 16.0$  Hz, 1H), 4.15 (d,  $J = 16.0$  Hz, 1H), 3.80 (s, 3H), 3.49 (s, 3H), 3.12 (dd,  $J = 14.7, 4.8$  Hz, 1H), 2.83 (dd,  $J = 14.7, 12.8$  Hz, 1H), 2.39 – 2.34 (m, 1H), 1.38 (s, 3H).  **$^{13}\text{C-NMR}$** : (176 MHz,  $\text{CDCl}_3$ )  $\delta$  171.63, 169.68, 168.78, 166.65, 153.55, 146.51, 142.60, 138.44, 131.89, 130.06, 129.49, 128.55, 128.48, 128.45, 127.57,

127.22, 125.28, 123.56, 123.04, 118.51, 110.28, 80.21, 65.28, 58.07, 56.82, 53.44, 53.25, 53.11, 52.74, 52.64, 37.86, 36.70, 31.71, 29.84, 28.03, 19.49, 1.16.

**Dimethyl (1*S*\*,3*aR*\*,8*bS*\*)-4-benzyl-8*b*-methyl-1-((*E*)-styryl)-1,3*a*,4,8*b*-tetrahydrocyclopenta[*b*]indole-3,3(2*H*)-dicarboxylate (3*ai*):**

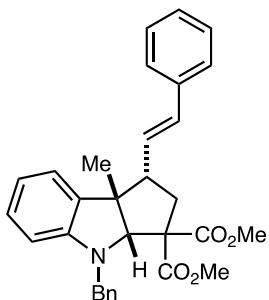

White solid (93%, *dr* = 1.7:1). **IR** (KBr,  $\text{cm}^{-1}$ )  $\nu$ : 3023, 2949, 2916, 2847, 1731, 1598, 1483, 1259.  **$^1\text{H-NMR}$** : (700 MHz,  $\text{CDCl}_3$ )  $\delta$  7.41 – 7.39 (m, 0.65H), 7.36 (d,  $J$  = 7.1 Hz, 1.48H), 7.34 – 7.32 (m, 1.76H), 7.29 – 7.27 (m, 2.58H), 7.25 – 7.20 (m, 2.25H), 7.19 (d,  $J$  = 7.6 Hz, 1.59H), 7.17 – 7.14 (m, 0.45H), 7.11 (t,  $J$  = 7.6 Hz, 0.69H), 7.08 – 7.05 (m, 0.30H), 7.05 – 7.01 (m, 0.89H), 6.99 (dd,  $J$  = 7.3, 1.3 Hz, 0.32H), 6.87 – 6.86 (m, 0.65H), 6.69 (q,  $J$  = 7.2 Hz, 0.92H), 6.50 – 6.43 (m, 1.84H), 6.25 (dd,  $J$  = 15.8, 8.6 Hz, 0.34H), 6.02 (dd,  $J$  = 15.8, 8.8 Hz, 0.65H), 4.63 (s, 0.40H), 4.59 (s, 0.60H), 4.58 (d,  $J$  = 6.7 Hz, 0.59H), 4.32 (d,  $J$  = 16.2 Hz, 0.31H), 4.17 (d,  $J$  = 16.1 Hz, 0.65H), 3.79 (s, 3H), 3.46 (s, 0.78H), 3.45 (s, 1.69H), 2.64 (dd,  $J$  = 13.23, 6.08 Hz, 0.31H), 2.51 (ddd,  $J$  = 13.8, 8.8, 4.9 Hz, 0.67H), 2.42 (t,  $J$  = 13.3 Hz, 0.76H), 2.27 (ddd,  $J$  = 12.7, 4.9, 1.5 Hz, 0.68H), 2.04 (t,  $J$  = 12.6 Hz, 0.36H), 1.33 (s, 1.96H), 1.26 (s, 0.81H).  **$^{13}\text{C-NMR}$** : (176 MHz,  $\text{CDCl}_3$ )  $\delta$  172.73, 171.89, 170.24, 169.06, 153.43, 150.58, 138.70, 138.48, 137.54, 137.52, 137.38, 133.20, 132.21, 131.31, 129.87, 128.79, 128.74, 128.49, 128.41, 128.24, 128.20, 128.18, 128.15, 127.89, 127.53, 127.46, 127.06, 127.00, 126.37, 126.35, 125.55, 122.13, 121.74, 118.67, 118.60, 110.16, 109.35, 81.71, 80.16, 77.34, 77.16, 76.98, 72.26, 65.81, 65.36, 57.61, 56.59, 55.91, 53.25, 52.94, 52.92, 52.81, 52.53, 52.45, 52.03, 40.02, 38.35, 29.85, 27.74, 22.88. **HRMS-ESI**: Calculated for  $\text{C}_{30}\text{H}_{32}\text{NO}_4$   $[\text{M}+\text{H}]^+$  = 482.2326, Found: 482.2298.

NMR data of the major isomer deduced from the 1.7:1 mixture:  **$^1\text{H-NMR}$** : (700 MHz,  $\text{CDCl}_3$ )  $\delta$  7.41 – 7.39 (m, 1H), 7.36 (d,  $J$  = 7.1 Hz, 2H), 7.34 – 7.32 (m, 2H), 7.29 – 7.27 (m, 3H), 7.19 (d,  $J$  = 7.6 Hz, 2H), 6.87 – 6.86 (m, 1H), 6.69 (q,  $J$  = 7.2 Hz, 1H), 6.50 – 6.43 (m, 2H), 6.02 (dd,  $J$  = 15.8, 8.8 Hz, 1H), 4.59 (d,  $J$  = 1.4 Hz, 1H), 4.58 (d,  $J$  = 6.7 Hz, 1H), 4.17 (d,  $J$  = 16.1 Hz, 1H), 3.79 (s, 3H), 3.45 (s, 3H), 2.51 (ddd,  $J$  = 13.8, 8.8, 4.9 Hz, 1H), 2.42 (t,  $J$  = 13.3 Hz, 1H), 2.27 (ddd,  $J$  = 12.7, 4.9, 1.5 Hz, 1H), 1.33 (s, 3H).  **$^{13}\text{C-NMR}$** : (176 MHz,  $\text{CDCl}_3$ )  $\delta$  171.89, 169.06, 153.43, 138.70, 137.38, 133.20, 132.21, 131.31, 129.87, 128.79,

128.49, 127.53, 126.35, 125.55, 122.13, 118.67, 110.16, 80.16, 65.81, 57.61, 56.59, 52.94, 52.45, 52.03, 38.35, 27.74.

**Dimethyl (1*S*\*,3*aR*\*,8*bS*\*)-4-benzyl-7-methoxy-1-(4-methoxyphenyl)-8*b*-methyl-1,3*a*,4,8*b*-tetrahydrocyclopenta[*b*]indole-3,3(2*H*)-dicarboxylate (3*ca*):**

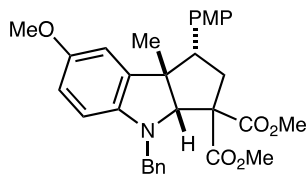

Colorless oil (83%, *dr* = 4:1). **IR** (KBr,  $\text{cm}^{-1}$ )  $\nu$ : 2951, 2916, 2833, 1731, 1610, 1514, 1261, 1013.  **$^1\text{H-NMR}$** : (700 MHz,  $\text{CDCl}_3$ )  $\delta$  7.30 – 7.27 (m, 4H), 7.24 – 7.18 (m, 4H), 7.13 (dd,  $J$  = 9.6, 2.9 Hz, 0.61H), 6.96 (d,  $J$  = 7.4 Hz, 1.33H), 6.87 (d,  $J$  = 8.6 Hz, 0.46H), 6.81 (d,  $J$  = 8.4 Hz, 1.45H), 6.58 (dd,  $J$  = 8.5, 2.7 Hz, 0.22H), 6.49 (dd,  $J$  = 8.6, 2.7 Hz, 0.72H), 6.32 (d,  $J$  = 8.6 Hz, 0.22H), 6.30 (d,  $J$  = 8.6 Hz, 0.68H), 6.28 (d,  $J$  = 2.7 Hz, 0.18H), 5.12 (d,  $J$  = 2.7 Hz, 0.70H), 4.69 (s, 0.22H), 4.60 (d,  $J$  = 16.2 Hz, 0.25H), 4.57 (s, 0.70H), 4.52 (d,  $J$  = 15.8 Hz, 0.80H), 4.23 (d,  $J$  = 16.1 Hz, 0.27H), 4.09 (d,  $J$  = 15.8 Hz, 0.81H), 3.82 (s, 0.67H), 3.79 (s, 2.25H), 3.77 (s, 1.94H), 3.68 (s, 0.56H), 3.48 (s, 1.97H), 3.40 (s, 0.57H), 3.34 (s, 2.22H), 2.97 (dd,  $J$  = 14.8, 4.6 Hz, 0.75H), 2.76 (dd,  $J$  = 14.8, 12.8 Hz, 0.82H), 2.71 (dd,  $J$  = 13.1, 5.7 Hz, 0.25H), 2.41 – 2.36 (m, 0.38H), 2.34 – 2.25 (m, 0.95H), 1.31 (s, 2.48H), 0.93 (s, 0.56H).  **$^{13}\text{C-NMR}$** : (176 MHz,  $\text{CDCl}_3$ )  $\delta$  172.91, 172.07, 170.36, 169.20, 158.89, 158.77, 153.28, 152.76, 147.62, 145.34, 139.03, 138.91, 138.39, 134.37, 130.62, 130.49, 130.09, 130.02, 129.90, 129.76, 129.49, 129.15, 128.84, 128.44, 128.34, 127.81, 127.79, 127.54, 127.34, 127.04, 126.83, 124.98, 114.57, 114.15, 113.74, 113.48, 113.36, 113.30, 112.67, 111.34, 110.81, 110.41, 109.92, 83.14, 80.82, 65.43, 64.01, 58.30, 57.67, 56.02, 55.69, 55.47, 55.45, 55.42, 55.40, 53.41, 52.92, 52.91, 52.72, 52.58, 52.53, 52.44, 39.46, 36.67, 29.85, 27.92, 22.38, 14.27. **HRMS-ESI**: Calculated for  $\text{C}_{31}\text{H}_{34}\text{NO}_6$   $[\text{M}+\text{H}]^+ = 516.2381$ , Found: 516.2376.

NMR data of the major isomer deduced from the 4:1 mixture:  **$^1\text{H-NMR}$** : (700 MHz,  $\text{CDCl}_3$ )  $\delta$  7.30 – 7.27 (m, 3H), 7.23 – 7.18 (m, 3H), 6.96 (d,  $J$  = 7.5 Hz, 2H), 6.81 (d,  $J$  = 8.4 Hz, 2H), 6.49 (dd,  $J$  = 8.6, 2.7 Hz, 1H), 6.30 (d,  $J$  = 8.6 Hz, 1H), 5.12 (d,  $J$  = 2.7 Hz, 1H), 4.56 (d,  $J$  = 1.5 Hz, 1H), 4.52 (d,  $J$  = 15.8 Hz, 1H), 4.09 (d,  $J$  = 15.8 Hz, 1H), 3.79 (s, 3H), 3.77 (s, 3H), 3.48 (s, 3H), 3.34 (s, 3H), 2.97 (dd,  $J$  = 14.8, 4.6 Hz, 1H), 2.76 (dd,  $J$  = 14.8, 12.7 Hz, 1H), 2.30 (ddt,  $J$  = 15.5, 4.3, 2.4 Hz, 1H), 1.31 (s, 3H).  **$^{13}\text{C-NMR}$** : (176 MHz,  $\text{CDCl}_3$ )  $\delta$  172.07, 169.20, 158.89, 152.76, 147.62, 139.03, 134.37, 130.49, 130.09, 128.44, 128.34, 127.81,



127.79, 127.04, 114.57, 113.48, 113.36, 111.34, 110.81, 80.82, 65.43, 58.30, 57.67, 55.69, 55.47, 55.40, 52.91, 52.53, 52.44, 36.67, 29.85, 27.92. The spectroscopic data agree with the literature.<sup>5</sup>

**Dimethyl (1*S*\*,3*aR*\*,8*bS*\*)-4-benzyl-7-bromo-1-(4-methoxyphenyl)-8*b*-methyl-1,3*a*,4,8*b*-tetrahydrocyclopenta[*b*]indole-3,3(2*H*)-dicarboxylate (3*da*):**

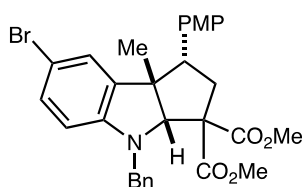

Colorless oil (57%, *dr* = 4:1). **IR** (KBr,  $\text{cm}^{-1}$ )  $\nu$ : 2927, 2917, 2848, 1731, 1610, 1514, 1260. **<sup>1</sup>H-NMR**: (700 MHz,  $\text{CDCl}_3$ )  $\delta$  7.31 – 7.27 (m, 1.78H), 7.25 – 7.21 (m, 1.37H), 7.17 – 7.14 (m, 1.37H), 7.14 – 7.12 (m, 0.48H), 7.12 – 7.10 (m, 0.28H), 7.00 (dd,  $J$  = 8.4, 2.1 Hz, 0.70H), 6.96 – 6.92 (m, 1.13H), 6.90 (d,  $J$  = 8.6 Hz, 0.57H), 6.87 – 6.83 (m, 1.33H), 6.79 (d,  $J$  = 2.1 Hz, 0.28H), 6.76 (d,  $J$  = 8.7 Hz, 0.14H), 6.31 (d,  $J$  = 8.4 Hz, 0.21H), 6.26 (d,  $J$  = 8.5 Hz, 0.70H), 5.49 (d,  $J$  = 2.1 Hz, 0.74H), 4.68 (s, 0.20H), 4.62 (d,  $J$  = 1.5 Hz, 0.78H), 4.55 (d,  $J$  = 16.0 Hz, 0.77H), 4.32 (d,  $J$  = 16.1 Hz, 0.38H), 4.11 (d,  $J$  = 16.0 Hz, 0.76H), 3.84 (s, 0.72H), 3.83 (s, 1.93H), 3.81 (s, 0.71H), 3.77 (s, 1.93H), 3.52 (s, 1.87H), 3.47 (s, 0.55H), 2.95 (dd,  $J$  = 14.8, 4.7 Hz, 0.75H), 2.71 (dd,  $J$  = 14.8, 12.9 Hz, 0.79H), 2.65 (dd,  $J$  = 13.1, 5.8 Hz, 0.28H), 2.34 – 2.30 (m, 0.81H), 2.31 – 2.26 (m, 0.57H), 1.29 (s, 2.25H), 0.88 (s, 0.72H). **<sup>13</sup>C-NMR**: (176 MHz,  $\text{CDCl}_3$ )  $\delta$  172.63, 171.81, 170.26, 169.07, 159.17, 158.89, 152.21, 149.66, 139.62, 138.09, 137.96, 135.39, 130.55, 130.51, 130.38, 130.03, 130.00, 129.78, 129.49, 129.06, 128.93, 128.84, 128.64, 128.60, 128.51, 127.79, 127.63, 127.54, 127.33, 127.17, 126.84, 125.90, 125.81, 124.98, 114.15, 113.71, 113.50, 110.98, 110.69, 110.04, 109.95, 82.01, 80.00, 65.25, 64.21, 57.73, 56.13, 55.61, 55.42, 54.89, 53.33, 53.04, 53.02, 53.00, 52.73, 52.71, 52.67, 52.65, 52.55, 52.51, 41.29, 39.16, 36.69, 32.08, 29.85, 29.81, 29.51, 27.71, 23.32, 22.84, 14.27, 1.17. **HRMS-ESI**: Calculated for  $\text{C}_{30}\text{H}_{31}\text{BrNO}_5$   $[\text{M}+\text{H}]^+ = 564.1380$ , Found: 564.1361.

NMR data of the major isomer deduced from the 4:1 mixture: **<sup>1</sup>H-NMR**: (700 MHz,  $\text{CDCl}_3$ )  $\delta$  7.31 – 7.27 (m, 2H), 7.25 – 7.21 (m, 2H), 7.17 – 7.14 (m, 2H), 7.00 (dd,  $J$  = 8.4, 2.1 Hz, 1H), 6.96 – 6.92 (m, 1H), 6.87 – 6.83 (m, 2H), 6.26 (d,  $J$  = 8.5 Hz, 1H), 5.49 (d,  $J$  = 2.1 Hz, 1H), 4.62 (d,  $J$  = 1.5 Hz, 1H), 4.55 (d,  $J$  = 16.0 Hz, 1H), 4.11 (d,  $J$  = 16.0 Hz, 1H), 3.83 (s, 3H), 3.77 (s, 3H), 3.52 (s, 3H), 2.95 (dd,  $J$  = 14.8, 4.7 Hz, 1H), 2.71 (dd,  $J$  = 14.8, 12.9 Hz, 1H), 2.34 – 2.30 (m, 1H), 1.29 (s, 3H). **<sup>13</sup>C-NMR**: (176 MHz,  $\text{CDCl}_3$ )  $\delta$  171.81, 169.07,

159.17, 152.21, 138.09, 135.39, 130.51, 130.03, 130.00, 129.78, 129.06, 128.60, 128.51, 127.79, 127.63, 127.33, 113.71, 113.50, 110.98, 109.95, 80.00, 65.25, 57.73, 56.12, 55.61, 53.00, 52.55, 52.51, 36.69, 29.85, 27.71. The spectroscopic data agree with the literature.<sup>5</sup>

**Dimethyl (1*S*\*,3*aR*\*,8*bS*\*)-4-benzyl-7-chloro-1-(4-methoxyphenyl)-8*b*-methyl-1,3*a*,4,8*b*-tetrahydrocyclopenta[*b*]indole-3,3(2*H*)-dicarboxylate (3ea):**

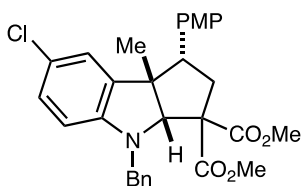

Colorless oil (58%, *dr* = 5:1). **IR** (KBr,  $\text{cm}^{-1}$ )  $\nu$ : 3024, 2950, 2834, 1731, 1599, 1514, 1246. **<sup>1</sup>H-NMR**: (700 MHz,  $\text{CDCl}_3$ )  $\delta$  7.32 – 7.24 (m, 4H), 7.24 – 7.16 (m, 3H), 7.04 – 7.01 (m, 0.29H), 6.92 (td,  $J$  = 7.7, 1.3 Hz, 1H), 6.88 (d,  $J$  = 8.6 Hz, 0.40H), 6.82 – 6.79 (m, 1.52H), 6.44 (d,  $J$  = 7.9 Hz, 0.19H), 6.40 (d,  $J$  = 7.9 Hz, 0.78H), 6.36 (td,  $J$  = 7.4, 1.0 Hz, 0.80H), 5.54 (dd,  $J$  = 7.5, 1.2 Hz, 0.81H), 4.70 (s, 0.21H), 4.65 (d,  $J$  = 16.3 Hz, 0.25H), 4.61 (d,  $J$  = 1.4 Hz, 0.65H), 4.59 (d,  $J$  = 16.1 Hz, 0.88H), 4.33 (d,  $J$  = 16.3 Hz, 0.25H), 4.16 (d,  $J$  = 16.1 Hz, 0.78H), 3.83 (s, 0.71H), 3.81 (s, 1.90H), 3.81 (s, 0.66H), 3.77 (s, 2.05H), 3.47 (s, 2.1H), 3.42 (s, 0.47H), 2.97 (dd,  $J$  = 14.8, 4.7 Hz, 0.80H), 2.75 (dd,  $J$  = 14.8, 12.8 Hz, 0.83H), 2.68 (dd,  $J$  = 13.1, 5.7 Hz, 0.24H), 2.31 (ddd,  $J$  = 12.6, 4.7, 1.5 Hz, 0.85H), 2.22 (t,  $J$  = 6.8 Hz, 0.14H), 1.34 (s, 2H), 0.93 (s, 0.60H). **<sup>13</sup>C-NMR**: (176 MHz,  $\text{CDCl}_3$ )  $\delta$  172.86, 172.00, 170.38, 169.22, 158.79, 158.74, 153.48, 150.91, 138.80, 138.64, 137.20, 133.02, 130.83, 130.45, 130.10, 129.19, 128.47, 128.38, 127.87, 127.85, 127.77, 127.60, 127.06, 126.90, 125.97, 125.45, 124.98, 122.84, 118.41, 118.22, 113.50, 113.26, 109.69, 109.57, 82.37, 80.22, 65.31, 64.12, 57.59, 56.70, 55.41, 55.40, 55.15, 53.79, 53.41, 52.95, 52.92, 52.57, 52.56, 52.47, 39.37, 36.87, 29.85, 28.16, 22.97, 21.61. **HRMS-ESI**: Calculated for  $\text{C}_{30}\text{H}_{31}\text{ClNO}_5$   $[\text{M}+\text{H}]^+ = 520.1885$ , Found: 520.1854.

NMR data of the major isomer deduced from the 5:1 mixture: **<sup>1</sup>H-NMR**: (700 MHz,  $\text{CDCl}_3$ )  $\delta$  7.32 – 7.24 (m, 3H), 7.22 (t,  $J$  = 7.3 Hz, 1H), 7.24 – 7.16 (m, 2H), 6.99 – 6.86 (m, 1H), 6.82 – 6.79 (m, 2H), 6.40 (d,  $J$  = 7.9 Hz, 1H), 6.36 (td,  $J$  = 7.4, 1.0 Hz, 1H), 5.54 (dd,  $J$  = 7.5, 1.2 Hz, 1H), 4.61 (d,  $J$  = 1.4 Hz, 1H), 4.59 (d,  $J$  = 16.1 Hz, 1H), 4.16 (d,  $J$  = 16.1 Hz, 1H), 3.81 (s, 3H), 3.77 (s, 3H), 3.47 (s, 3H), 2.97 (dd,  $J$  = 14.8, 4.7 Hz, 1H), 2.75 (dd,  $J$  = 14.8, 12.8 Hz, 1H), 2.31 (ddd,  $J$  = 12.6, 4.7, 1.5 Hz, 1H), 1.34 (s, 3H). **<sup>13</sup>C-NMR**: (176 MHz,  $\text{CDCl}_3$ )  $\delta$  171.99, 169.22, 158.79, 153.48, 138.80, 133.02, 130.45, 130.10, 129.19, 128.47, 128.38, 127.87, 127.77, 127.60, 127.06, 125.97, 118.22, 113.50, 113.26, 109.69, 80.22,

65.31, 57.59, 56.70, 55.41, 52.92, 52.56, 52.47, 36.87, 28.16. The spectroscopic data agree with the literature.<sup>5</sup>

**Dimethyl (1*S*\*,3*aR*\*,8*bS*\*)-4-benzyl-6-chloro-1-(4-methoxyphenyl)-8*b*-methyl-1,3*a*,4,8*b*-tetrahydrocyclopenta[*b*]indole-3,3(2*H*)-dicarboxylate (3*fa*):**

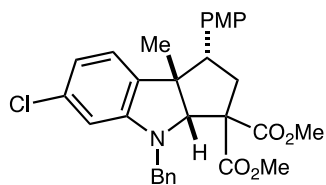

Pale yellow oil (73%, *dr* = 8.6:1). **IR** (KBr,  $\text{cm}^{-1}$ )  $\nu$ : 3000, 2978, 2952, 2919, 2847, 1731, 1594, 1514, 1247. **<sup>1</sup>H-NMR**: (700 MHz,  $\text{CDCl}_3$ )  $\delta$  7.32 – 7.22 (m, 1.80H), 7.24 (t,  $J$  = 7.4 Hz, 1H), 7.18 – 7.15 (m, 2H), 7.12 (dd,  $J$  = 8.8, 2.6 Hz, 0.82H), 7.08 – 7.04 (m,

0.30H), 6.95 (d,  $J$  = 8.0 Hz, 1.34H), 6.89 – 6.87 (m, 0.28H), 6.83 – 6.78 (m, 1.87H), 6.62 (d,  $J$  = 1.3 Hz, 0.20H), 6.43 (s, 0.14H), 6.38 (d,  $J$  = 1.8 Hz, 0.82H), 6.31 (dd,  $J$  = 8.0, 1.9 Hz, 0.85H), 5.40 (d,  $J$  = 8.0 Hz, 0.82H), 4.69 (s, 0.14H), 4.64 (d,  $J$  = 1.4 Hz, 0.85H), 4.61 (d,  $J$  = 16.3 Hz, 0.21H), 4.56 (d,  $J$  = 16.1 Hz, 0.89H), 4.35 (d,  $J$  = 16.3 Hz, 0.20H), 4.13 (d,  $J$  = 16.1 Hz, 0.89H), 3.82 (s, 0.32H), 3.81 (s, 2.34H), 3.80 (s, 0.34H), 3.77 (s, 2.28H), 3.50 (s, 2.44H), 3.48 (s, 0.30H), 2.94 (dd,  $J$  = 14.8, 4.6 Hz, 0.88H), 2.72 (dd,  $J$  = 14.8, 12.8 Hz, 0.96H), 2.64 (dd,  $J$  = 13.1, 5.8 Hz, 0.20H), 2.31 (ddd,  $J$  = 12.8, 4.7, 1.5 Hz, 0.92H), 1.29 (s, 2.49H), 0.87 (s, 0.52H). **<sup>13</sup>C-NMR**: (176 MHz,  $\text{CDCl}_3$ )  $\delta$  172.62, 171.80, 170.49, 170.24, 169.06, 167.32, 167.08, 159.06, 158.90, 154.43, 137.90, 137.77, 136.02, 133.74, 131.61, 130.55, 130.04, 130.02, 129.76, 129.49, 129.19, 129.04, 128.84, 128.64, 128.56, 128.38, 128.04, 127.79, 127.58, 127.54, 127.36, 127.22, 126.66, 126.61, 125.45, 124.98, 123.51, 118.12, 118.09, 114.15, 113.74, 113.62, 113.37, 109.57, 109.28, 82.02, 80.10, 65.12, 64.19, 57.65, 57.15, 55.70, 55.42, 55.41, 55.36, 54.53, 53.43, 53.02, 53.00, 52.90, 52.71, 52.66, 52.56, 52.40, 52.32, 50.12, 41.29, 39.17, 37.23, 36.82, 32.37, 29.85, 29.81, 27.92, 23.32, 19.43, 1.17.

**HRMS-ESI**: Calculated for  $\text{C}_{30}\text{H}_{31}\text{ClNO}_5$   $[\text{M}+\text{H}]^+ = 520.1885$ , Found: 520.1854.

NMR data of the major isomer deduced from the 8.6:1 mixture: **<sup>1</sup>H-NMR**: (700 MHz,  $\text{CDCl}_3$ )  $\delta$  7.32 – 7.22 (m, 2H), 7.18 – 7.15 (m, 1H), 7.12 (dd,  $J$  = 8.8, 2.6 Hz, 2H), 6.95 (d,  $J$  = 8.0 Hz, 1H), 6.83 – 6.78 (m, 1H), 6.38 (d,  $J$  = 1.8 Hz, 2H), 6.31 (dd,  $J$  = 8.0, 1.9 Hz, 1H), 5.40 (d,  $J$  = 8.0 Hz, 1H), 4.64 (d,  $J$  = 1.4 Hz, 1H), 4.56 (d,  $J$  = 16.1 Hz, 1H), 4.13 (d,  $J$  = 16.1 Hz, 1H), 3.81 (s, 3H), 3.77 (s, 3H), 3.50 (s, 3H), 2.94 (dd,  $J$  = 14.8, 4.6 Hz, 1H), 2.72 (dd,  $J$  = 14.8, 12.8 Hz, 1H), 2.31 (ddd,  $J$  = 12.8, 4.7, 1.5 Hz, 1H), 1.29 (s, 3H). **<sup>13</sup>C-NMR**: (176 MHz,  $\text{CDCl}_3$ )  $\delta$  171.80, 169.06, 158.90, 154.43, 137.90, 133.74, 131.61, 130.04, 130.02,

129.76, 128.64, 127.58, 127.36, 126.66, 118.09, 113.74, 113.37, 109.57, 80.10, 65.12, 57.15,  
55.70, 55.42, 55.41, 55.36, 53.00, 52.90, 52.71, 52.56, 52.40, 52.32, 37.23, 36.82, 32.37,  
29.85, 27.92, 19.43.

# 5. $^1\text{H}$ NMR, $^{13}\text{C}$ NMR, FT-IR and Mass spectra.

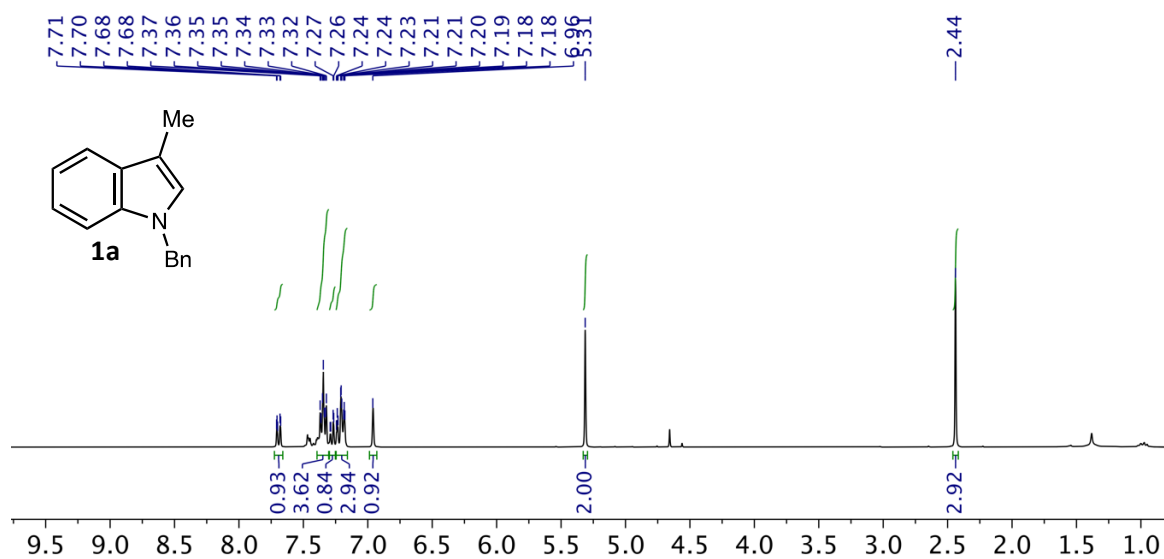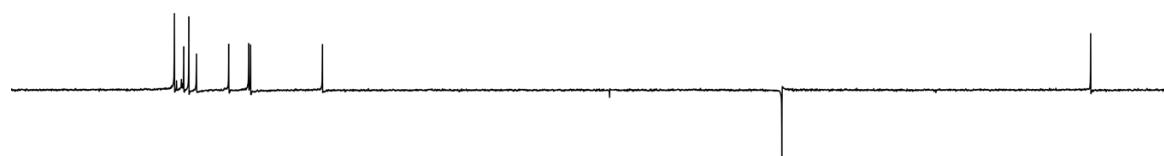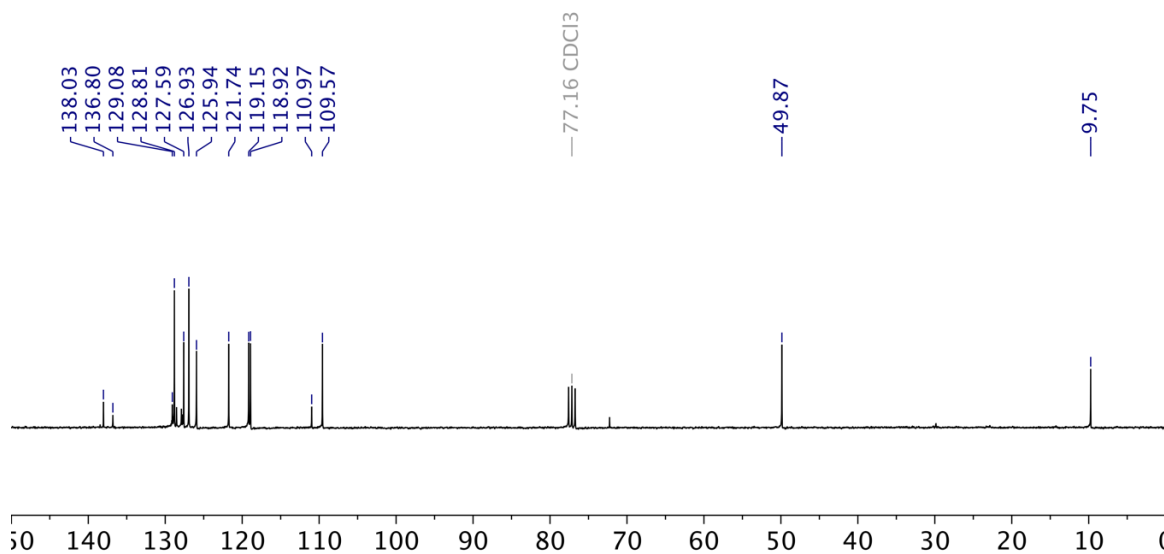

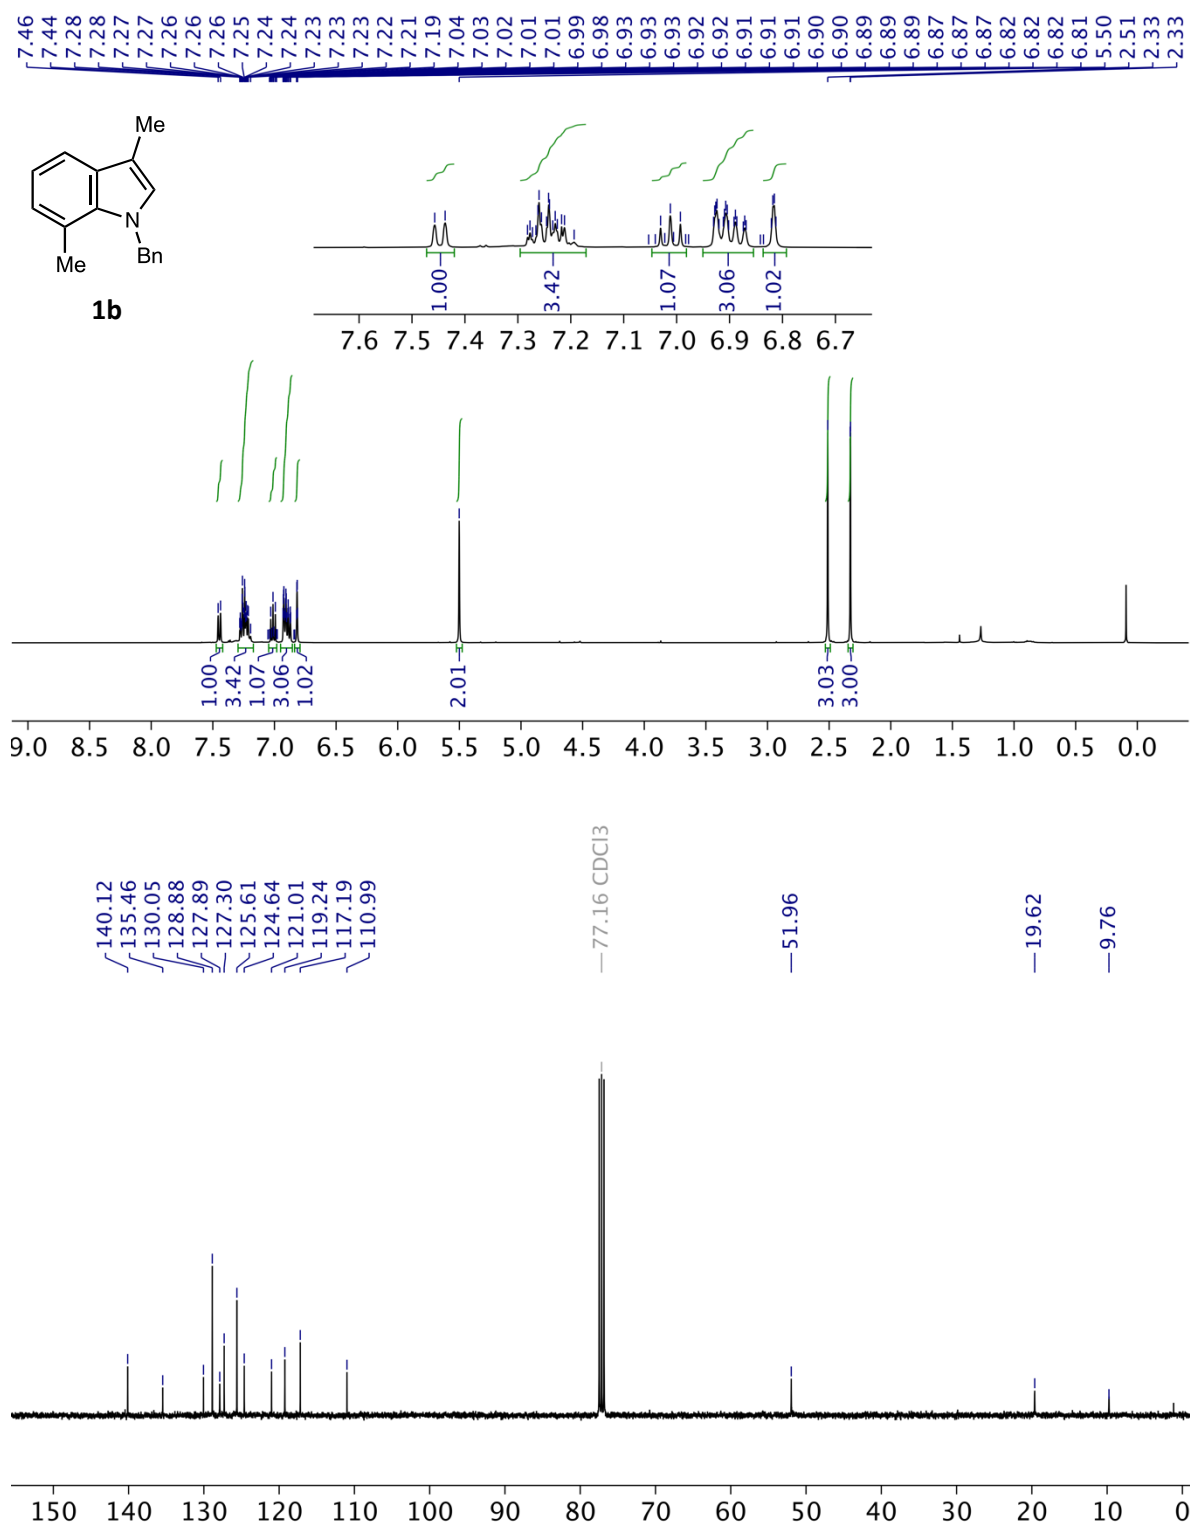

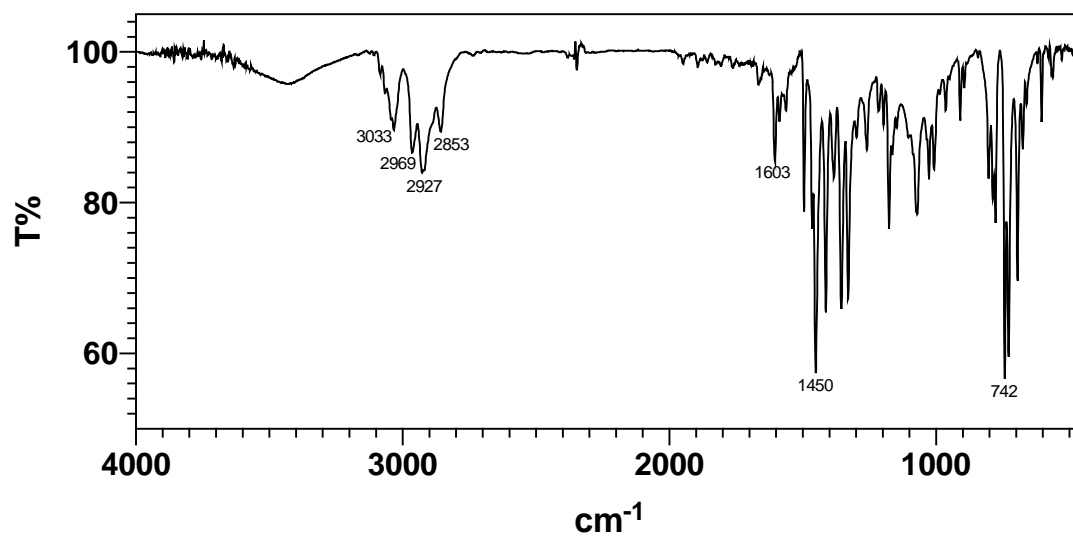

#### Acquisition Parameter

|             |          |                    |          |                    |        |
|-------------|----------|--------------------|----------|--------------------|--------|
| Source Type | ESI      | Ion Polarity       | Positive | Set Corrector Fill | 74 V   |
| n/a         | n/a      | Set Capillary Exit | 80.0 V   | Set Pulsar Pull    | 799 V  |
| Scan Begin  | 50 m/z   | Set Hexapole RF    | 60.0 V   | Set Pulsar Push    | 799 V  |
| Scan End    | 3000 m/z | Set Skimmer 1      | 50.0 V   | Set Reflector      | 1700 V |
|             |          | Set Hexapole 1     | 24.3 V   | Set Flight Tube    | 8600 V |
|             |          |                    |          | Set Detector TOF   | 2311 V |

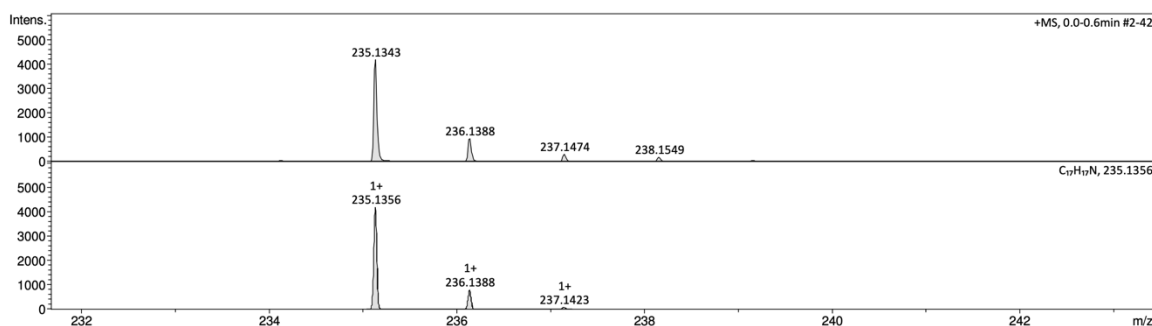

| Meas. $m/z$ | # | Ion Formula                       | $m/z$    | err [ppm] | mSigma | # mSigma | Score  | rdB  | e <sup>-</sup> | Conf | N-Rule |
|-------------|---|-----------------------------------|----------|-----------|--------|----------|--------|------|----------------|------|--------|
| 235.1343    | 1 | C <sub>17</sub> H <sub>17</sub> N | 235.1356 | 5.2       | 37.1   | 1        | 100.00 | 10.0 | odd            |      | ok     |

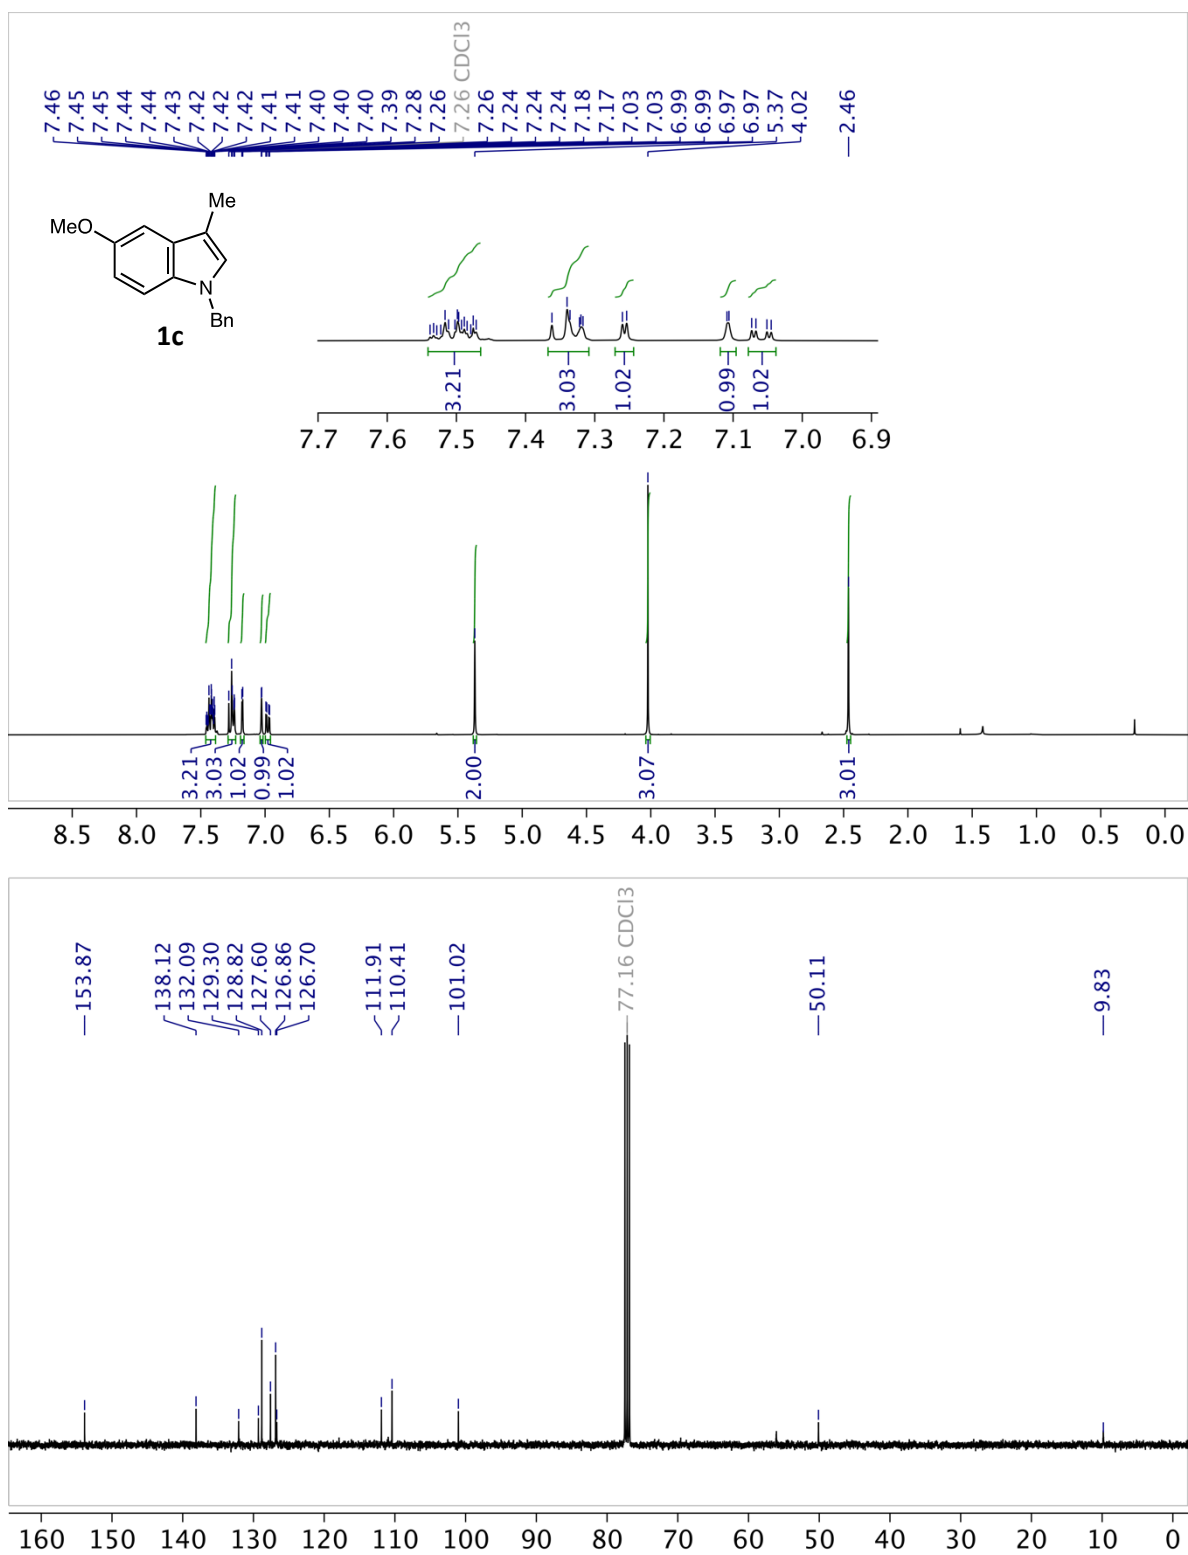



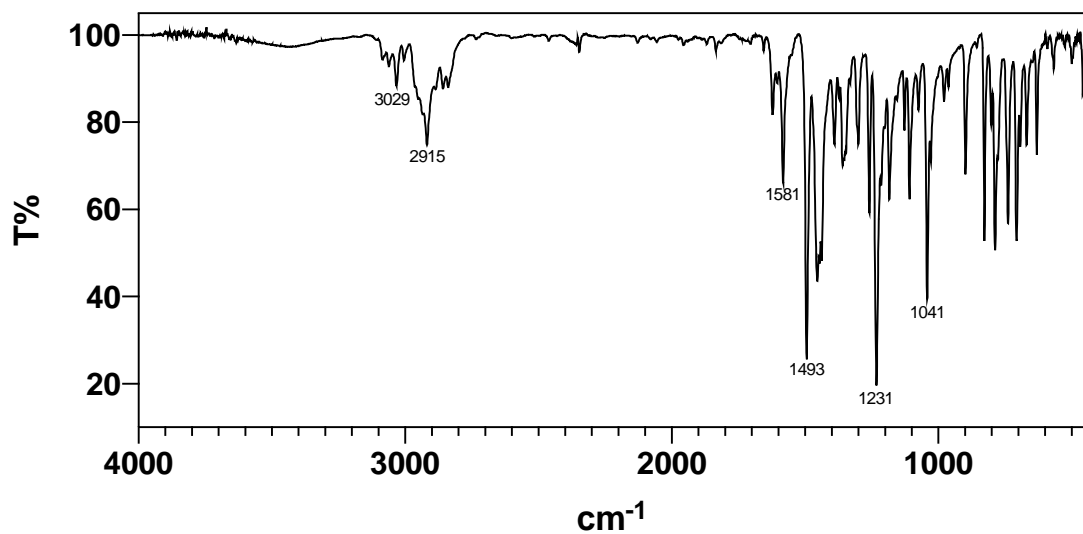

#### Acquisition Parameter

|             |          |                    |          |                    |        |
|-------------|----------|--------------------|----------|--------------------|--------|
| Source Type | ESI      | Ion Polarity       | Positive | Set Corrector Fill | 74 V   |
| n/a         | n/a      | Set Capillary Exit | 80.0 V   | Set Pulsar Pull    | 799 V  |
| Scan Begin  | 50 m/z   | Set Hexapole RF    | 60.0 V   | Set Pulsar Push    | 799 V  |
| Scan End    | 3000 m/z | Set Skimmer 1      | 50.0 V   | Set Reflector      | 1700 V |
|             |          | Set Hexapole 1     | 24.3 V   | Set Flight Tube    | 8600 V |
|             |          |                    |          | Set Detector TOF   | 2311 V |

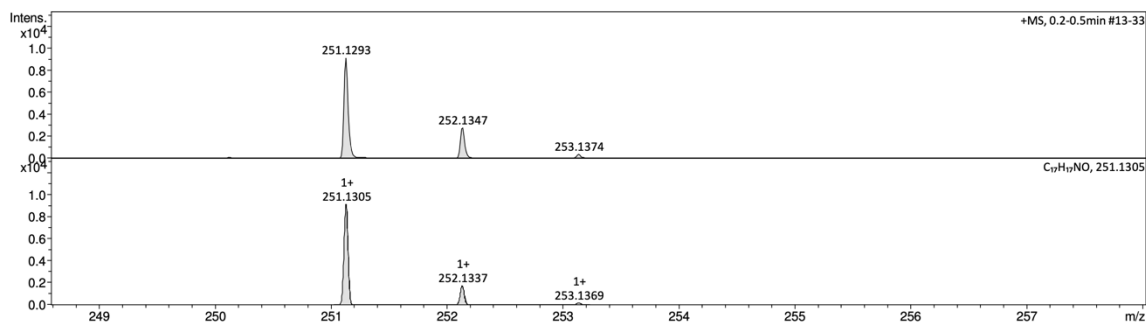

| Meas. m/z | # | Ion Formula                        | m/z      | err [ppm] | mSigma | # mSigma | Score  | rdb  | e <sup>-</sup> | Conf | N-Rule |
|-----------|---|------------------------------------|----------|-----------|--------|----------|--------|------|----------------|------|--------|
| 251.1293  | 1 | C <sub>17</sub> H <sub>17</sub> NO | 251.1305 | 4.7       | 64.8   | 1        | 100.00 | 10.0 | odd            |      | ok     |

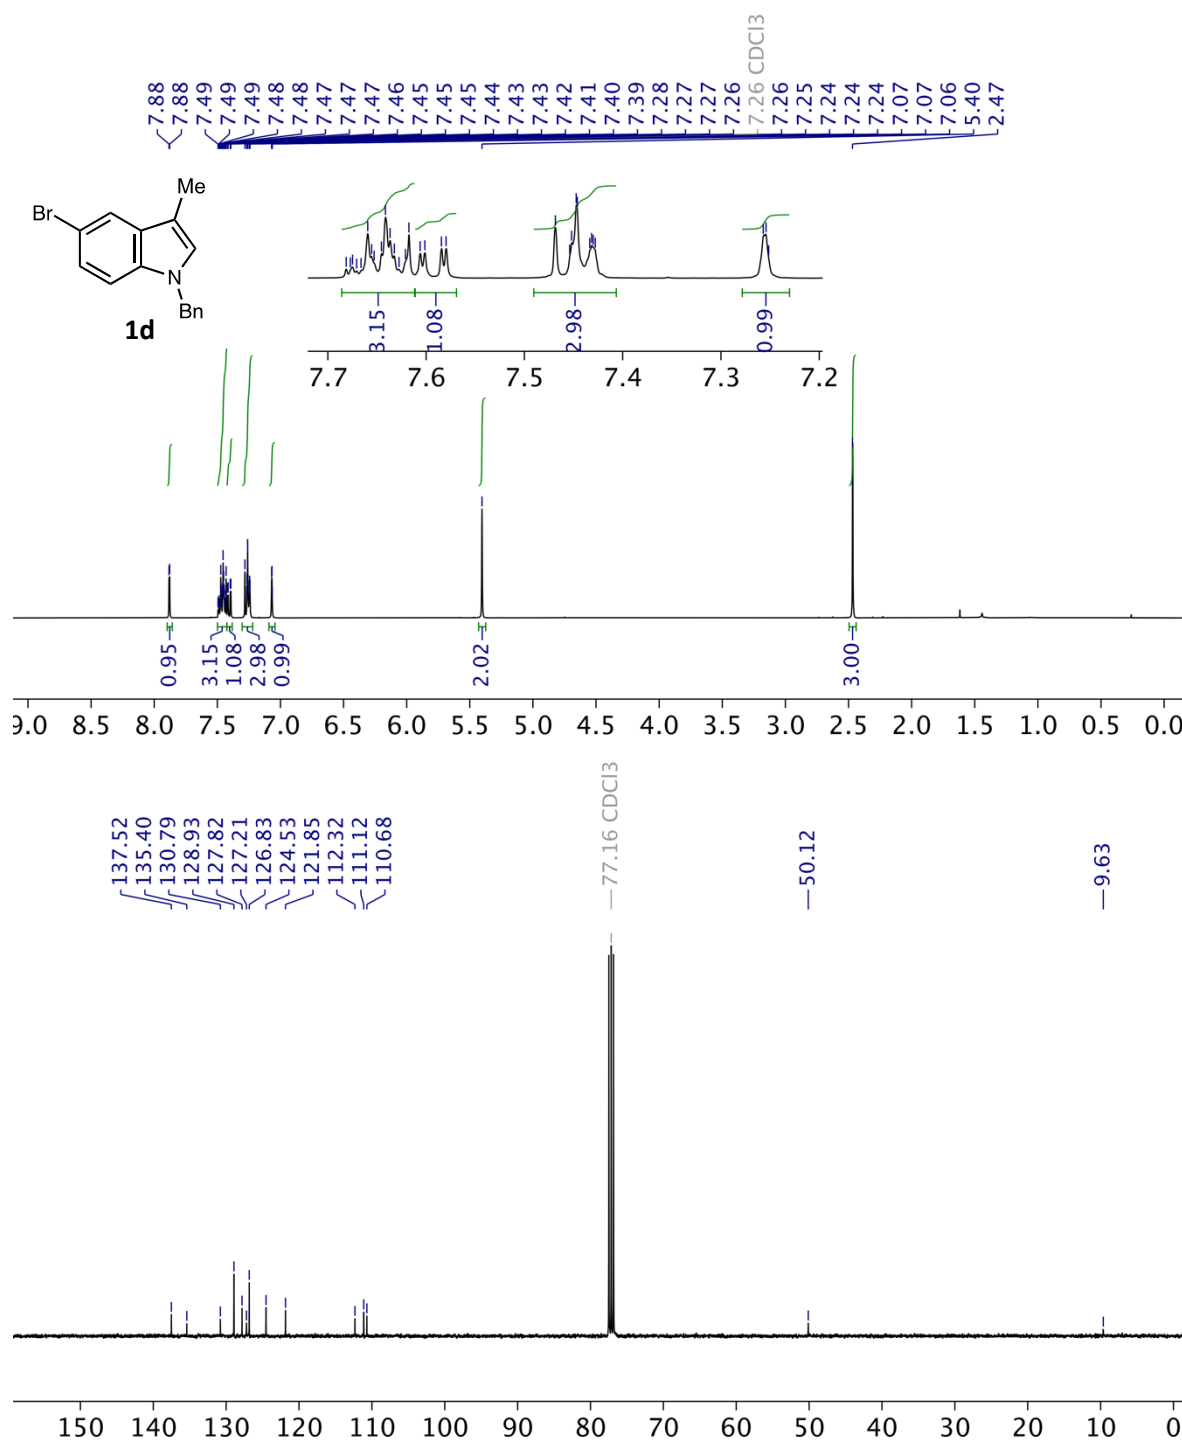

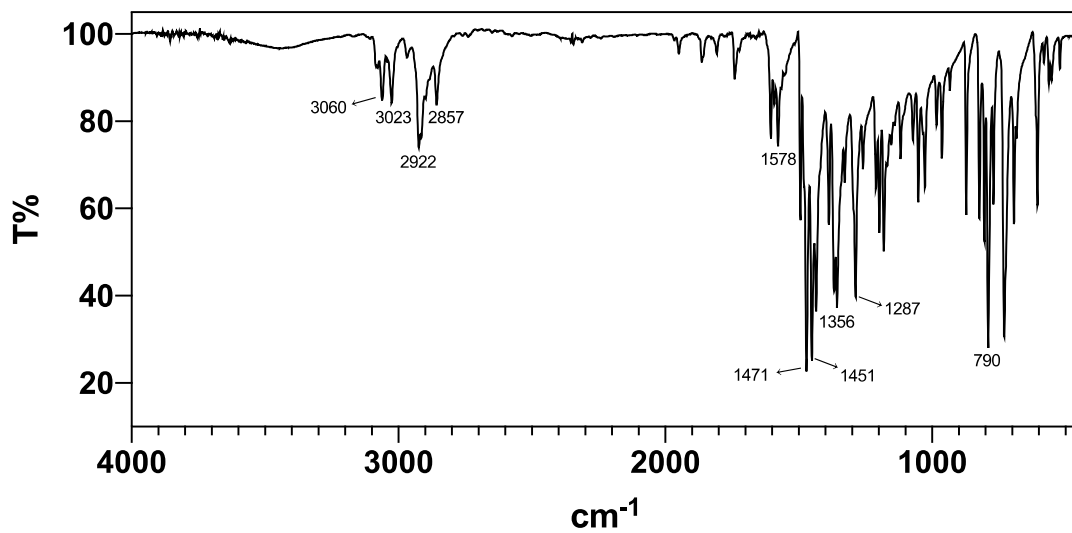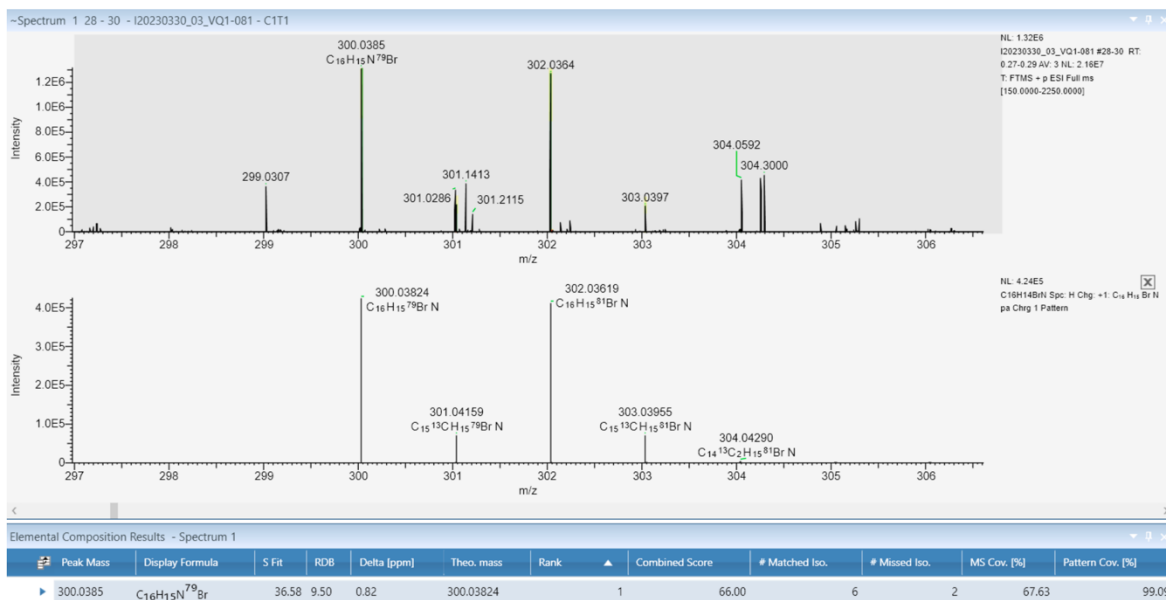

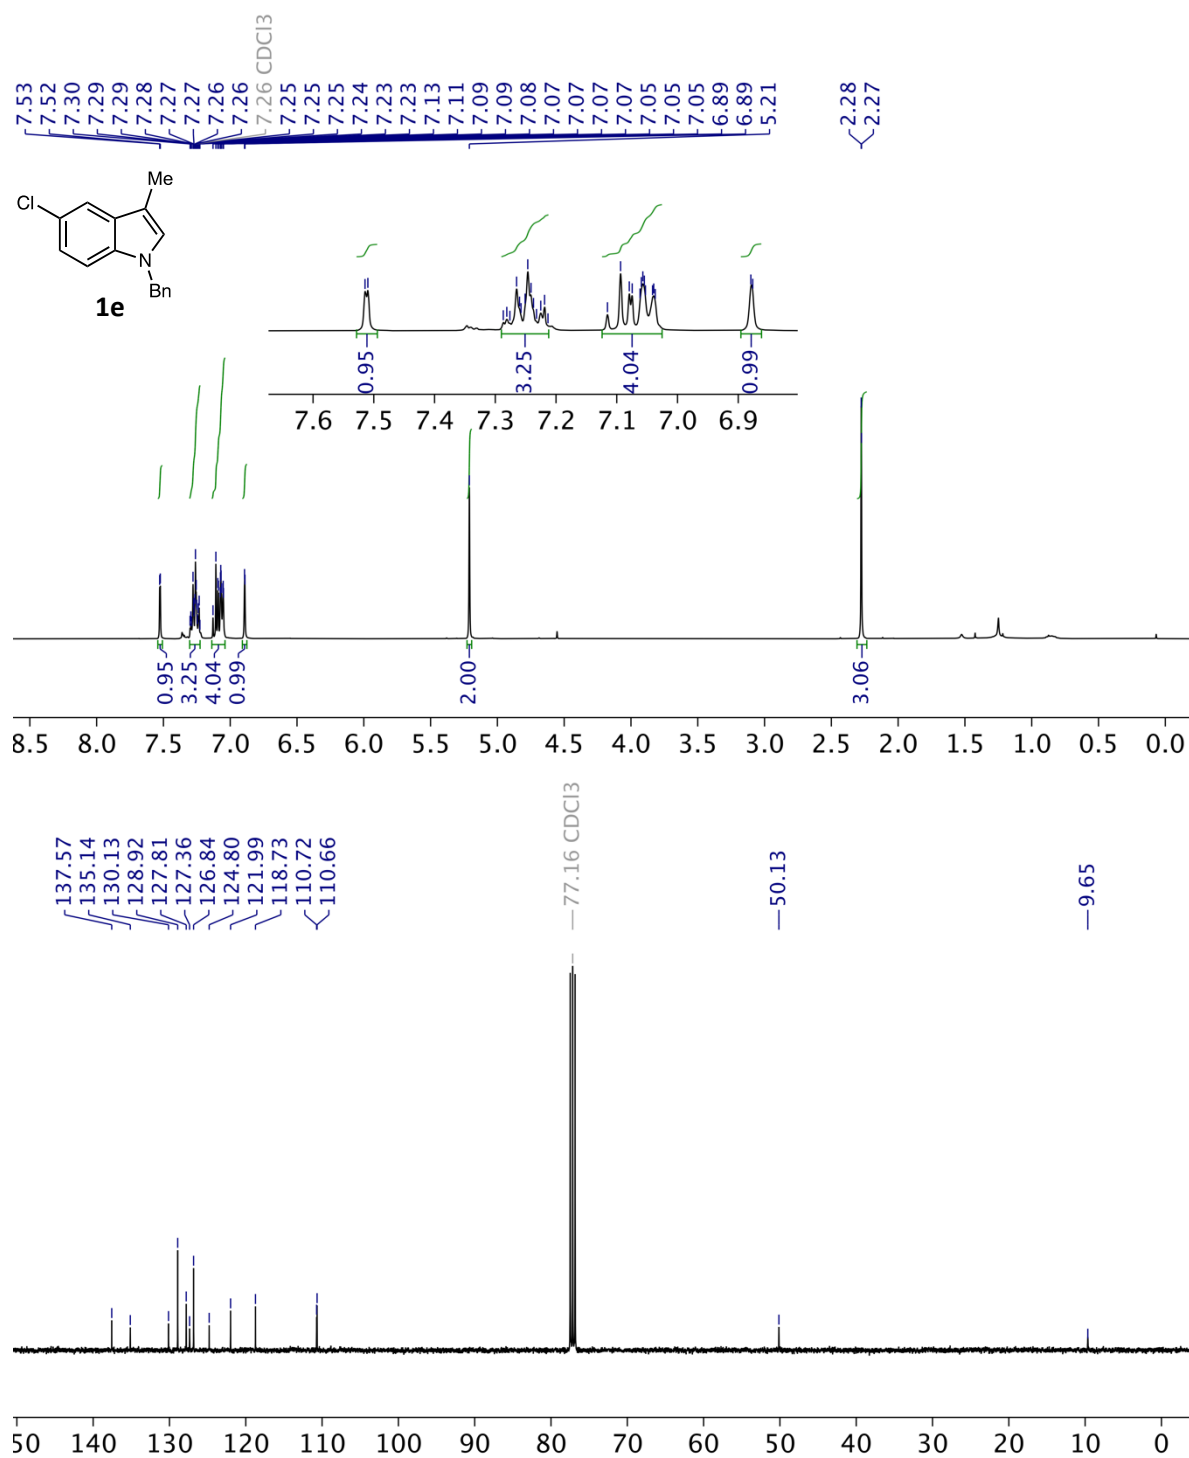

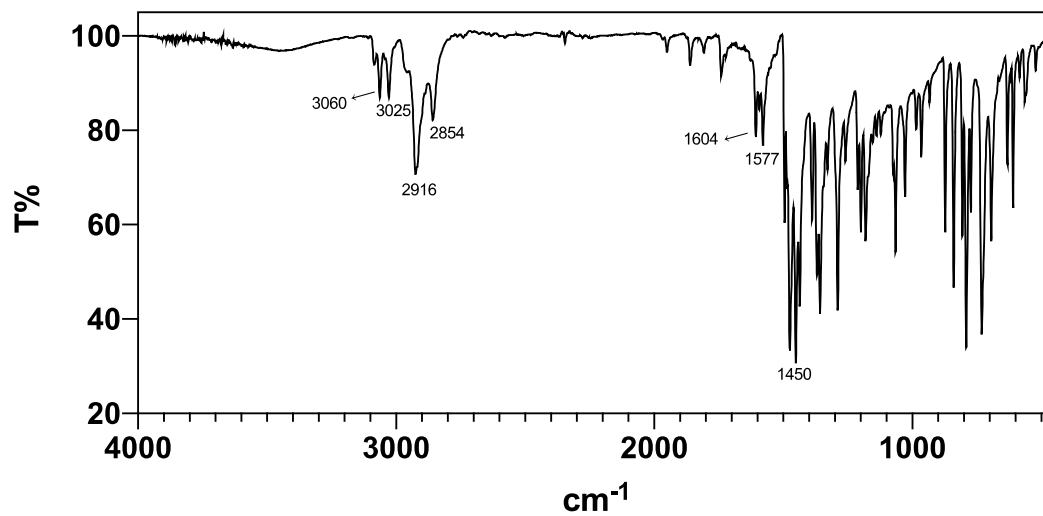

#### Acquisition Parameter

|             |          |                    |          |                    |        |
|-------------|----------|--------------------|----------|--------------------|--------|
| Source Type | ESI      | Ion Polarity       | Positive | Set Corrector Fill | 74 V   |
| n/a         | n/a      | Set Capillary Exit | 80.0 V   | Set Pulsar Pull    | 799 V  |
| Scan Begin  | 50 m/z   | Set Hexapole RF    | 60.0 V   | Set Pulsar Push    | 799 V  |
| Scan End    | 3000 m/z | Set Skimmer 1      | 50.0 V   | Set Reflector      | 1700 V |
|             |          | Set Hexapole 1     | 24.3 V   | Set Flight Tube    | 8600 V |
|             |          |                    |          | Set Detector TOF   | 2311 V |

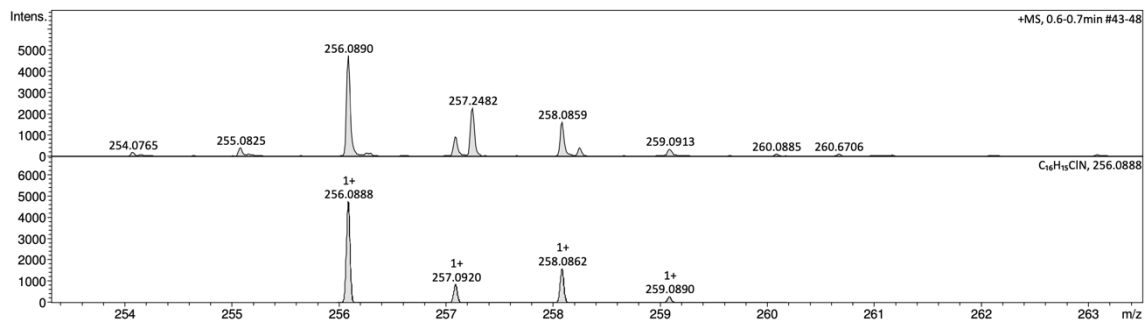

| Meas. $m/z$ | # | Ion Formula                         | $m/z$    | err [ppm] | mSigma | # mSigma | Score  | rdB | e <sup>-</sup> Conf | N-Rule |
|-------------|---|-------------------------------------|----------|-----------|--------|----------|--------|-----|---------------------|--------|
| 256.0890    | 1 | C <sub>16</sub> H <sub>15</sub> CIN | 256.0888 | -1.0      | 11.7   | 1        | 100.00 | 9.5 | even                | ok     |

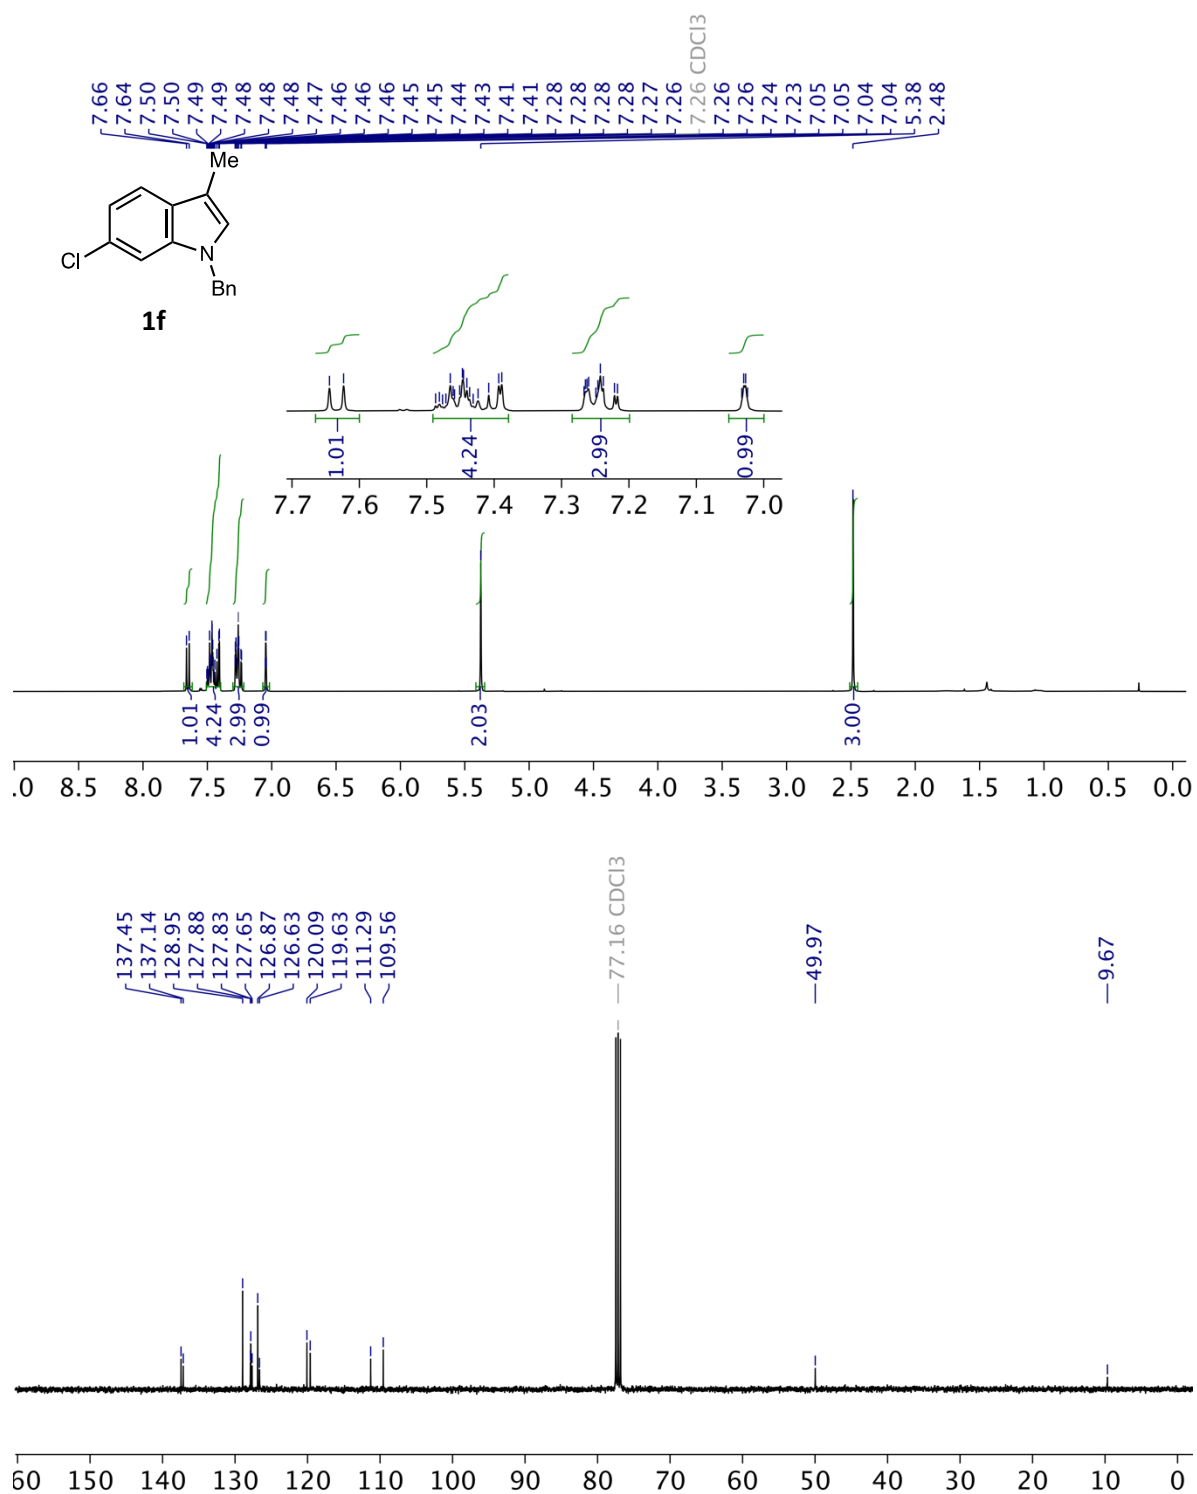

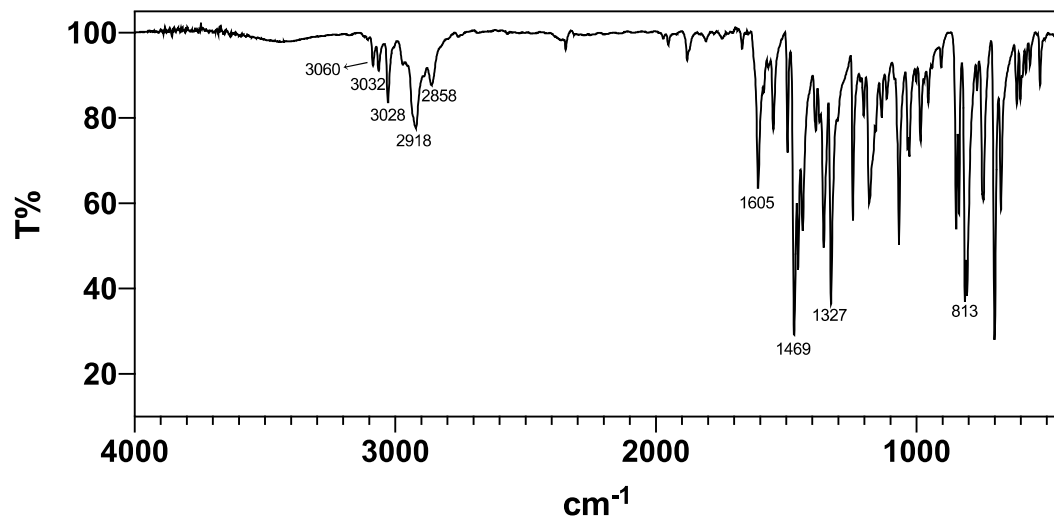

#### Acquisition Parameter

|              |          |                    |        |            |           |                 |        |
|--------------|----------|--------------------|--------|------------|-----------|-----------------|--------|
| Source Type  | ESI      | Capillary          | 4500 V | Nebulizer  | 0.4 Bar   | Corona          | 172 nA |
| Ion Polarity | Positive | Set Capillary Exit | 80.0 V | Dry Gas    | 4.0 l/min | Set Hexapole RF | 60.0 V |
| n/a          | n/a      | Set Skimmer 1      | 50.0 V | Dry Heater | 180 °C    | APCI Heater     | 514 °C |

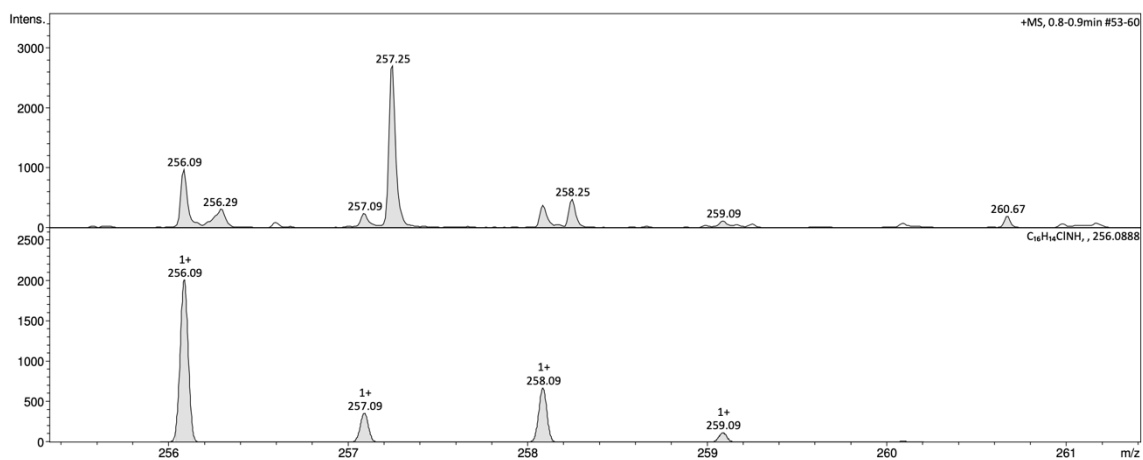

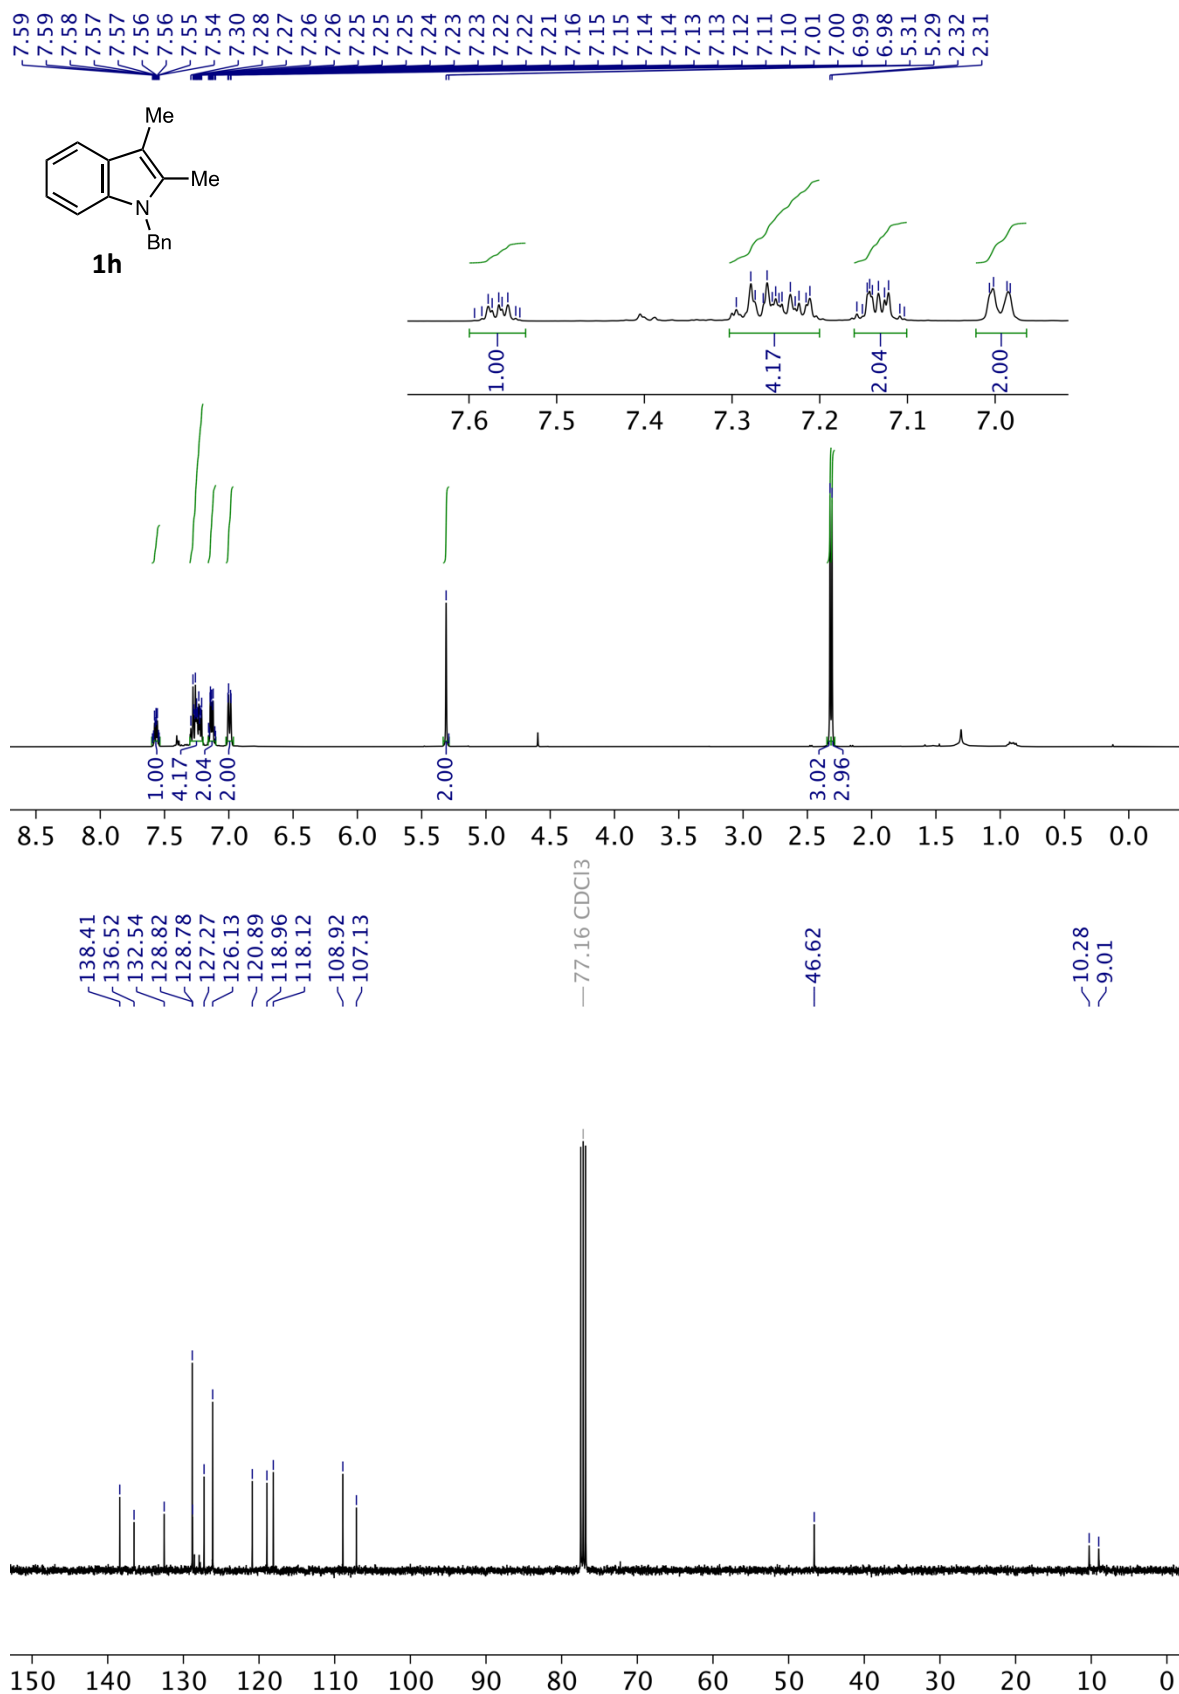



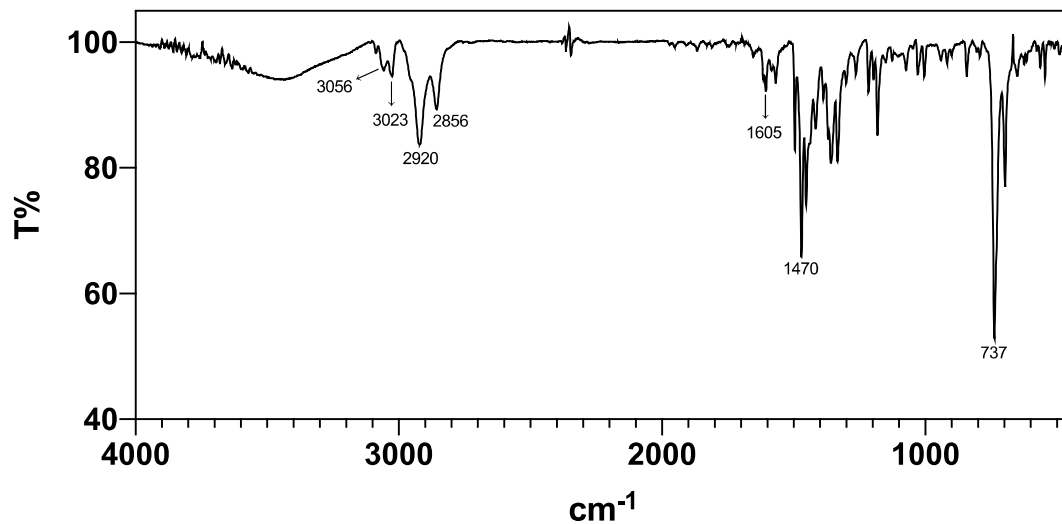

#### Acquisition Parameter

|             |          |                    |          |                    |        |
|-------------|----------|--------------------|----------|--------------------|--------|
| Source Type | ESI      | Ion Polarity       | Positive | Set Corrector Fill | 74 V   |
| n/a         | n/a      | Set Capillary Exit | 80.0 V   | Set Pulsar Pull    | 799 V  |
| Scan Begin  | 50 m/z   | Set Hexapole RF    | 60.0 V   | Set Pulsar Push    | 799 V  |
| Scan End    | 3000 m/z | Set Skimmer 1      | 50.0 V   | Set Reflector      | 1700 V |
|             |          | Set Hexapole 1     | 24.3 V   | Set Flight Tube    | 8600 V |
|             |          |                    |          | Set Detector TOF   | 2311 V |

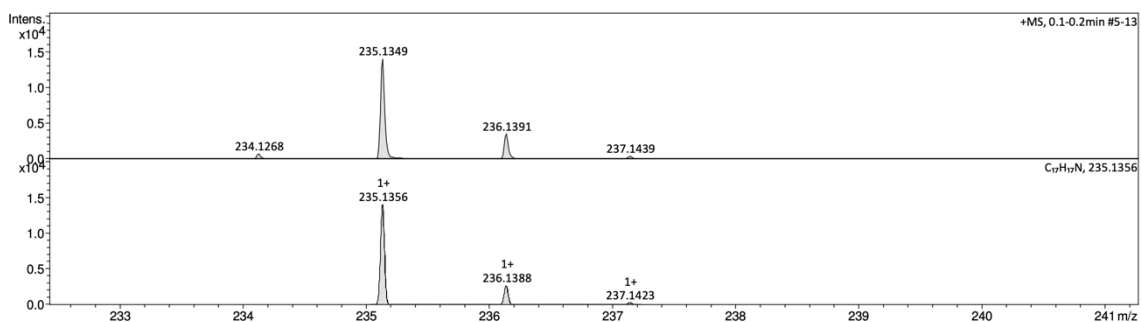

| Meas. $m/z$ | # | Ion Formula                       | $m/z$    | err [ppm] | mSigma | # mSigma | Score  | rdb  | e <sup>-</sup> | Conf | N-Rule |
|-------------|---|-----------------------------------|----------|-----------|--------|----------|--------|------|----------------|------|--------|
| 235.1349    | 1 | C <sub>17</sub> H <sub>17</sub> N | 235.1356 | 2.9       | 33.9   | 1        | 100.00 | 10.0 | odd            |      | ok     |

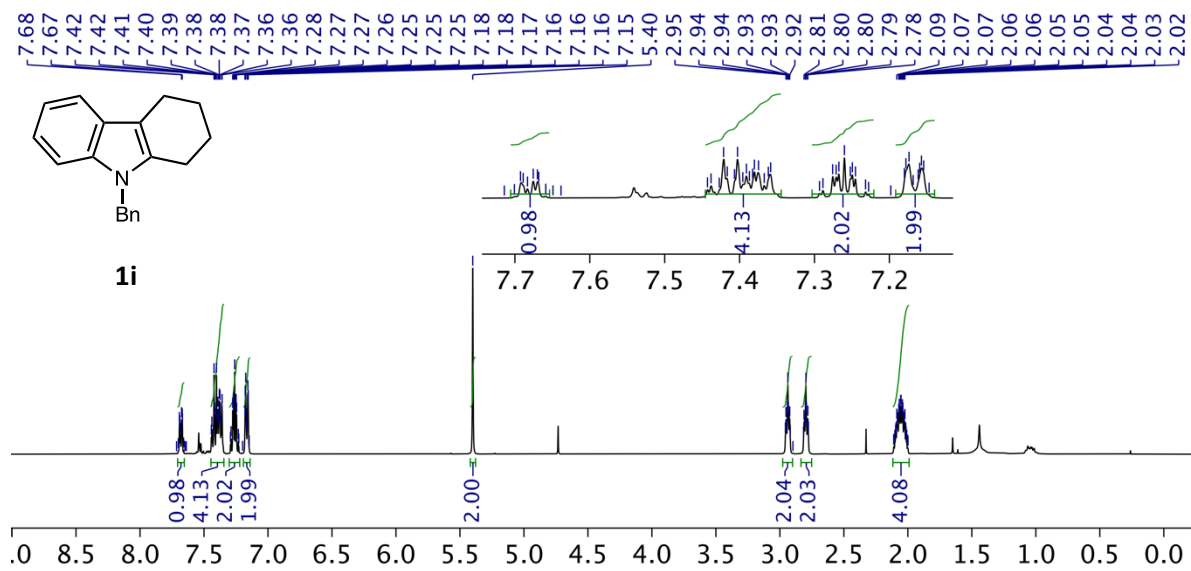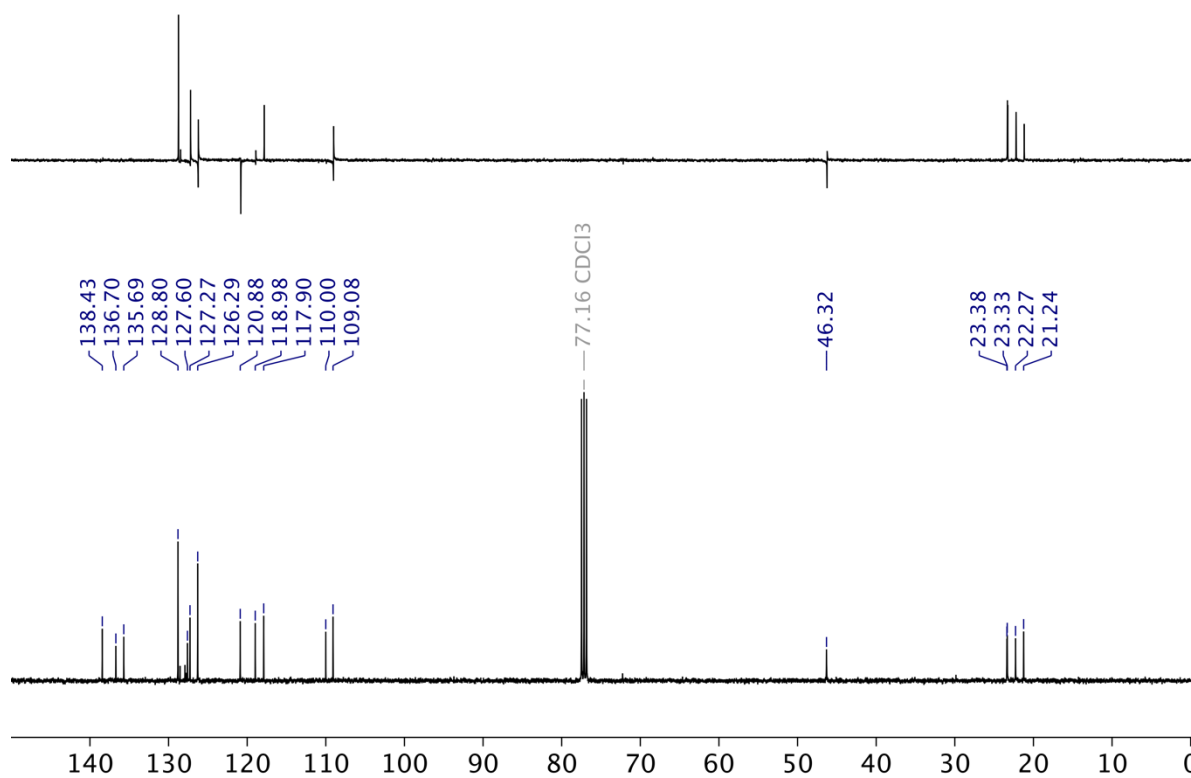

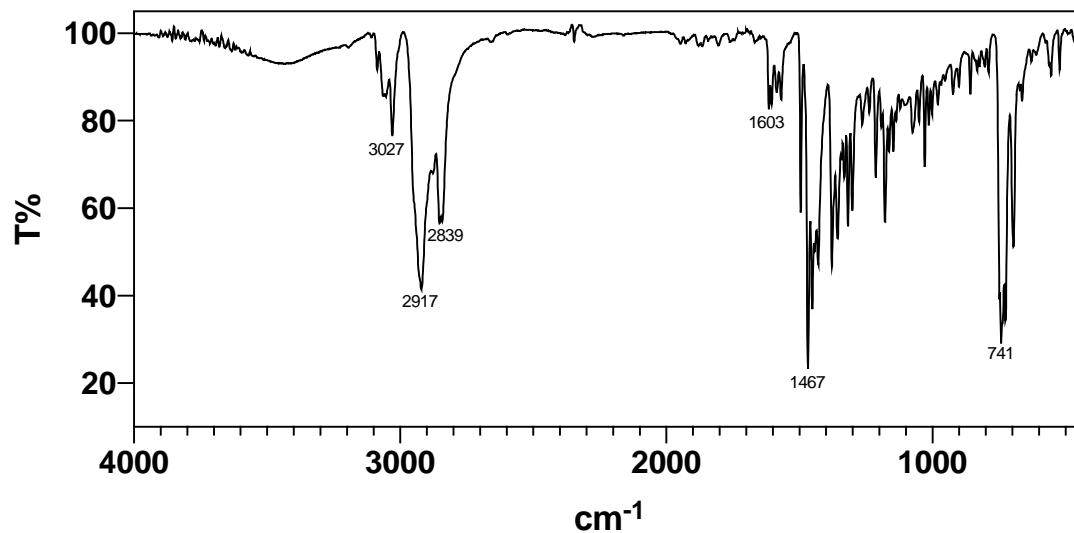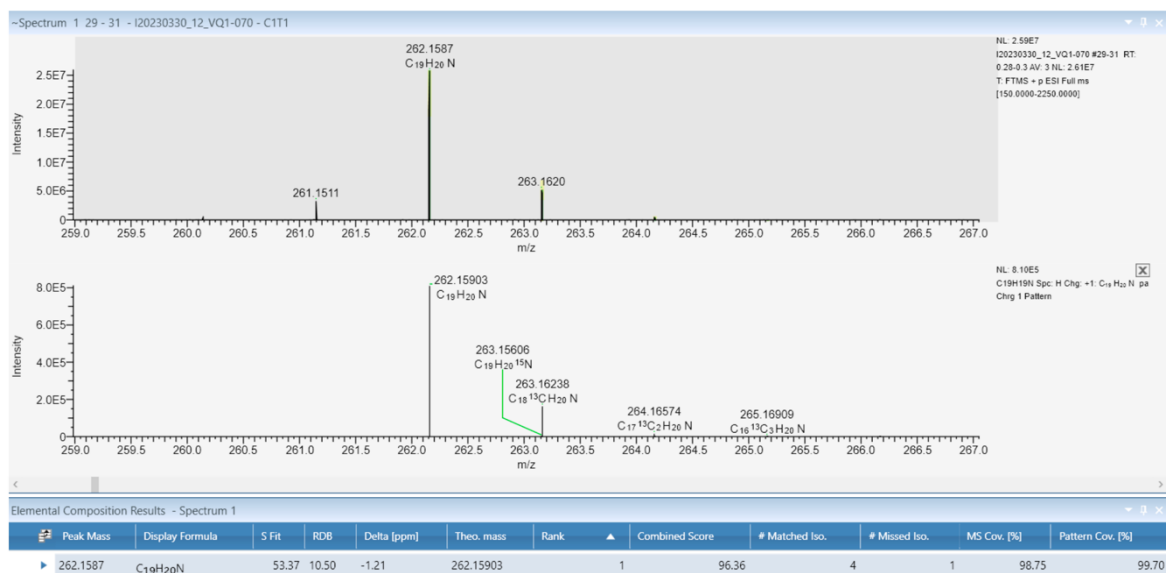

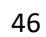

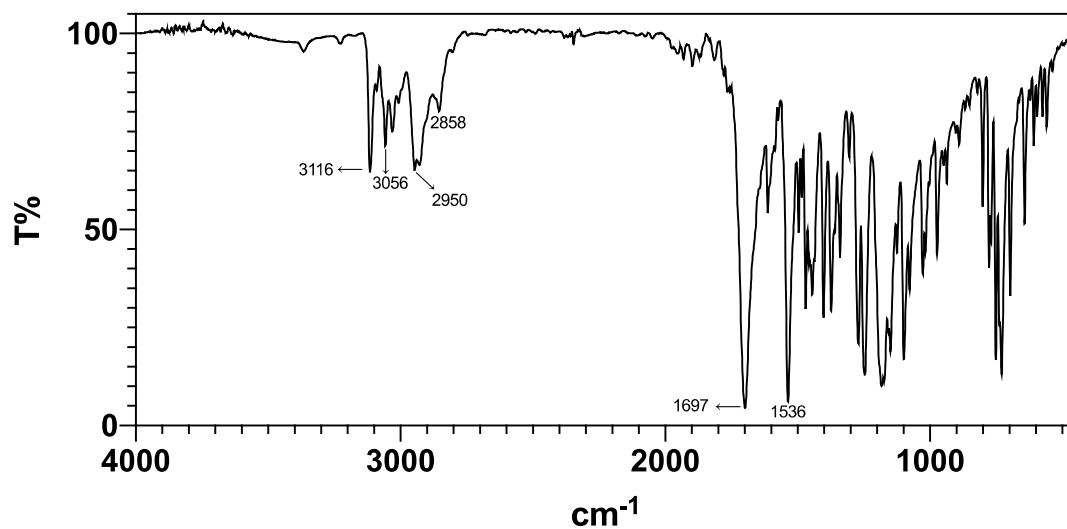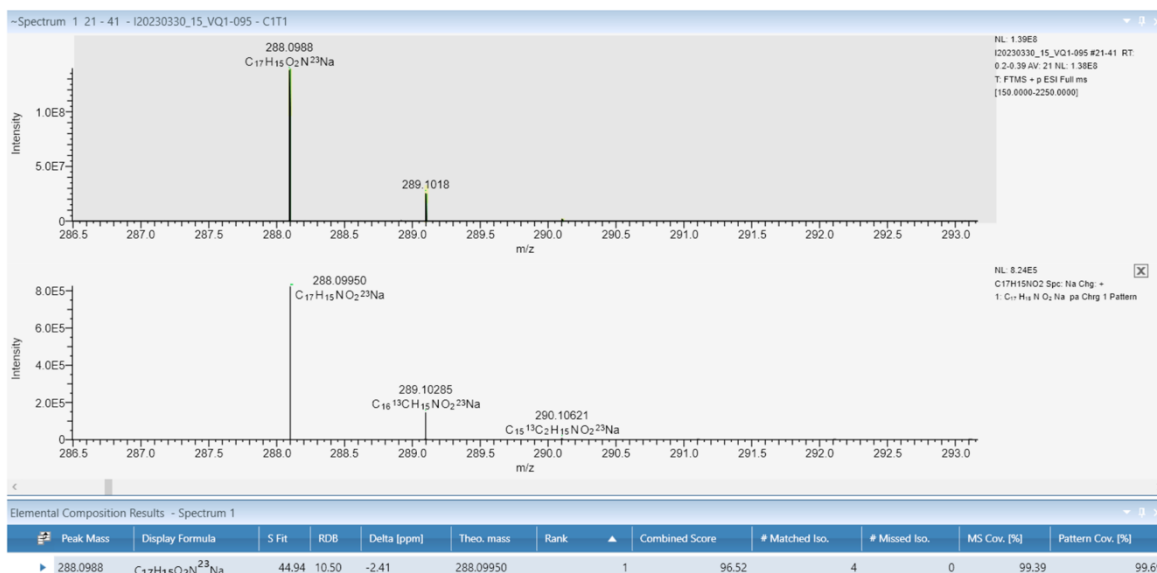

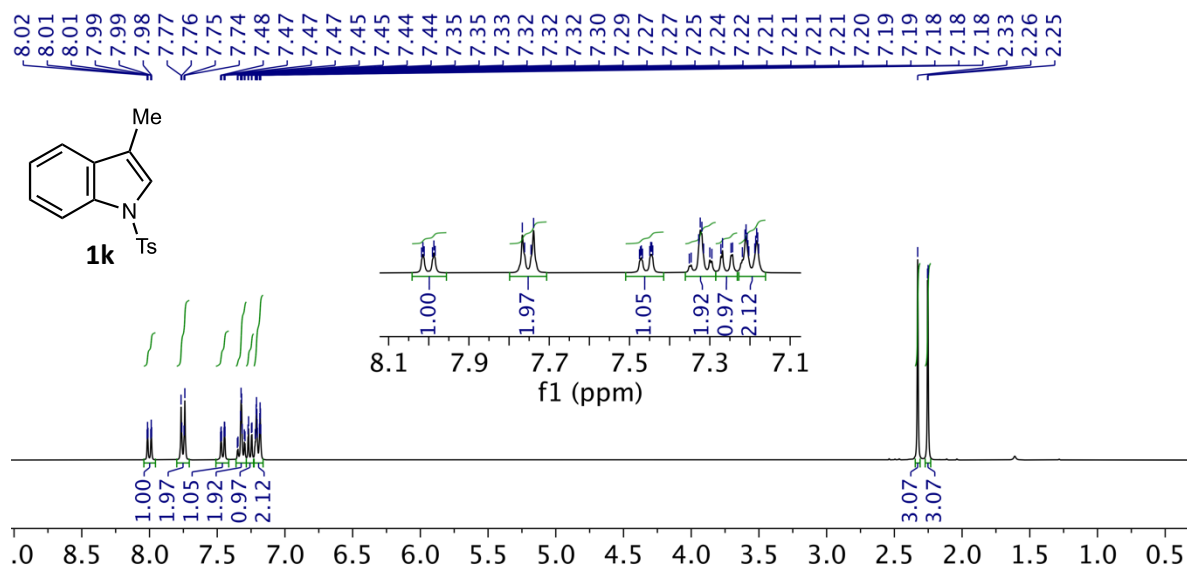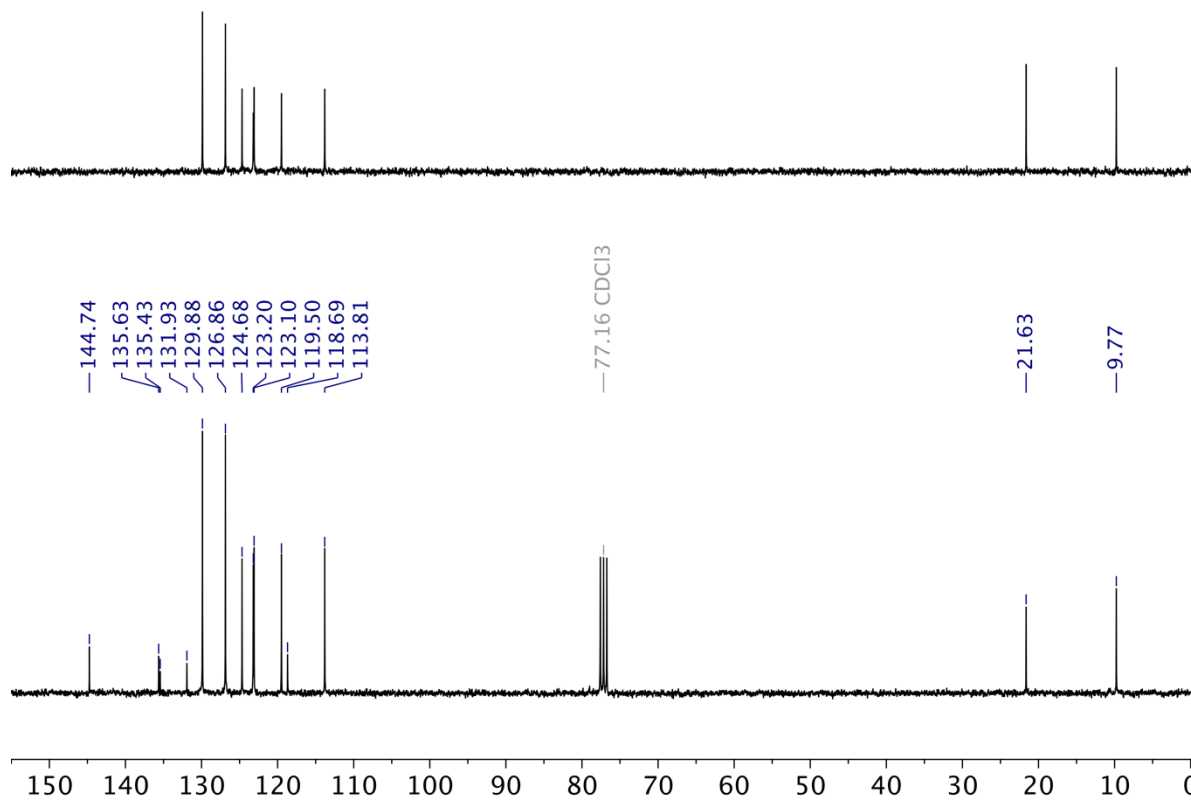

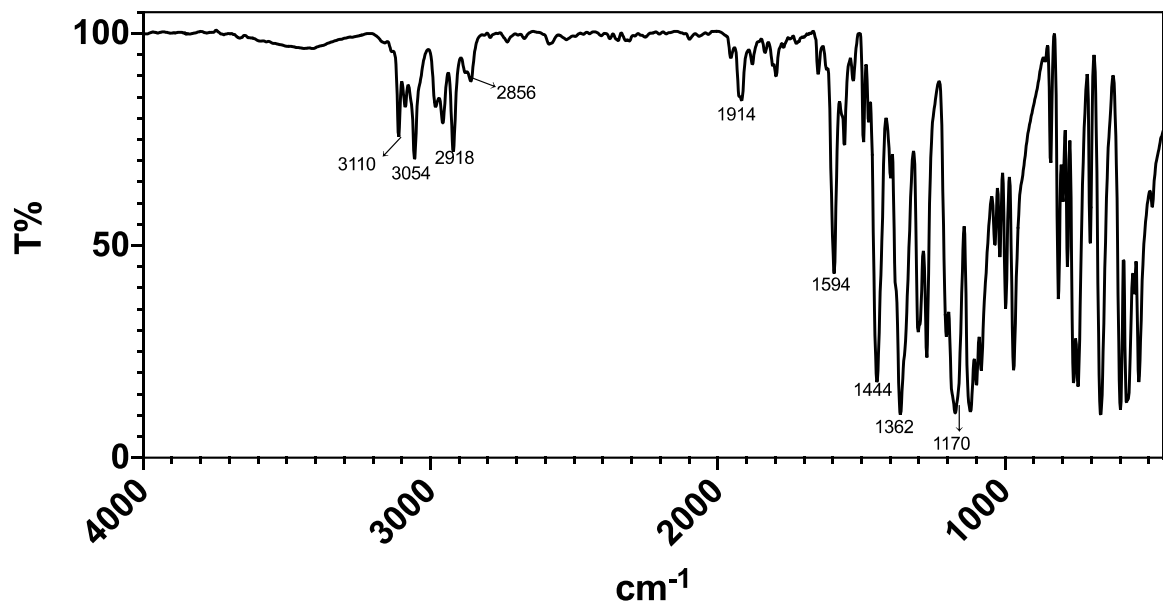

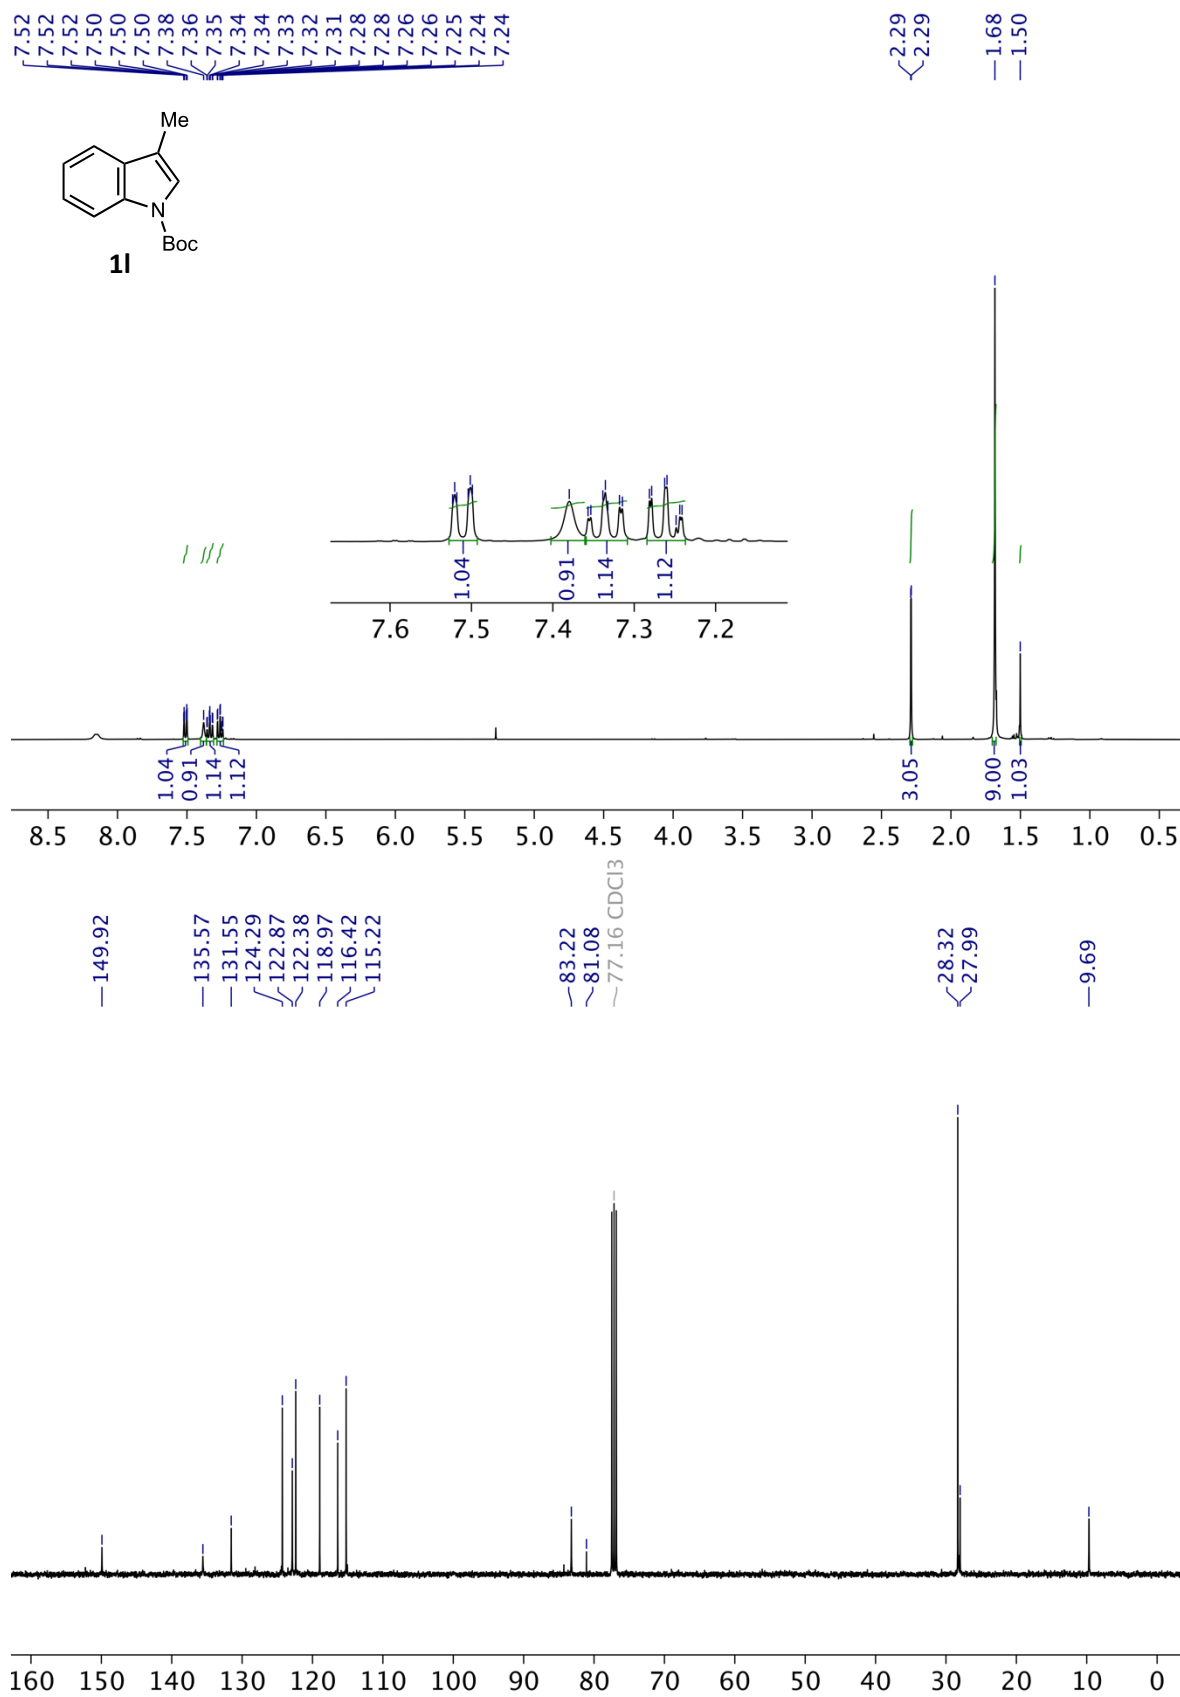



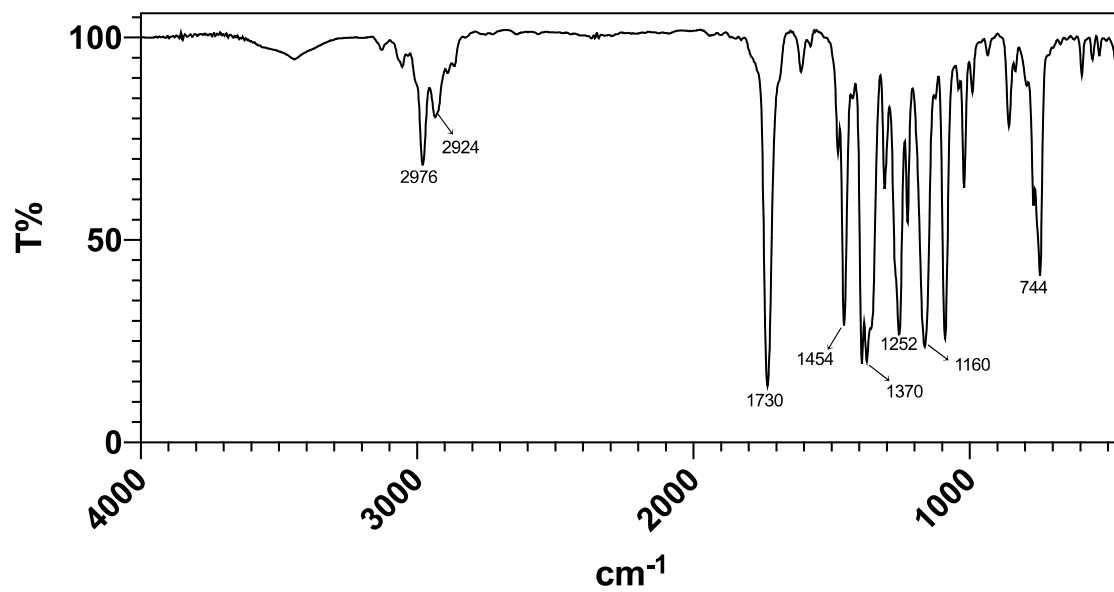

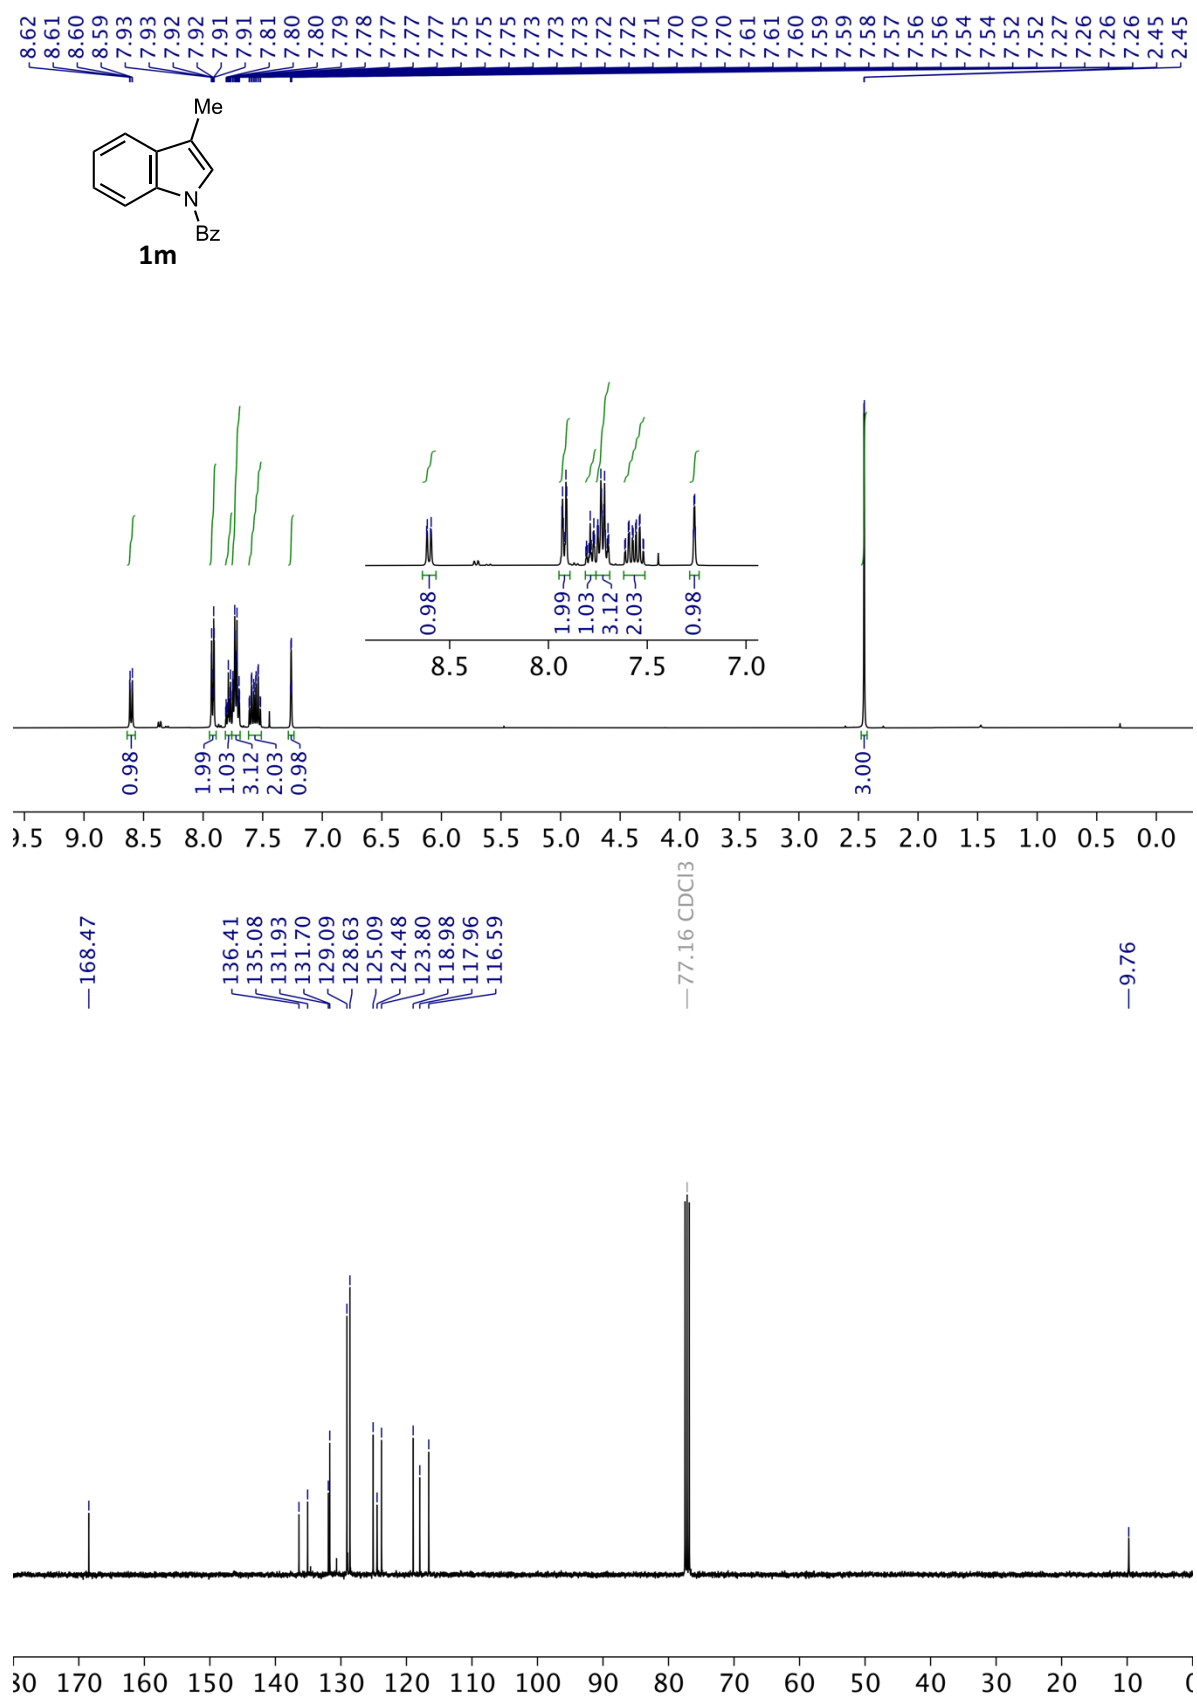

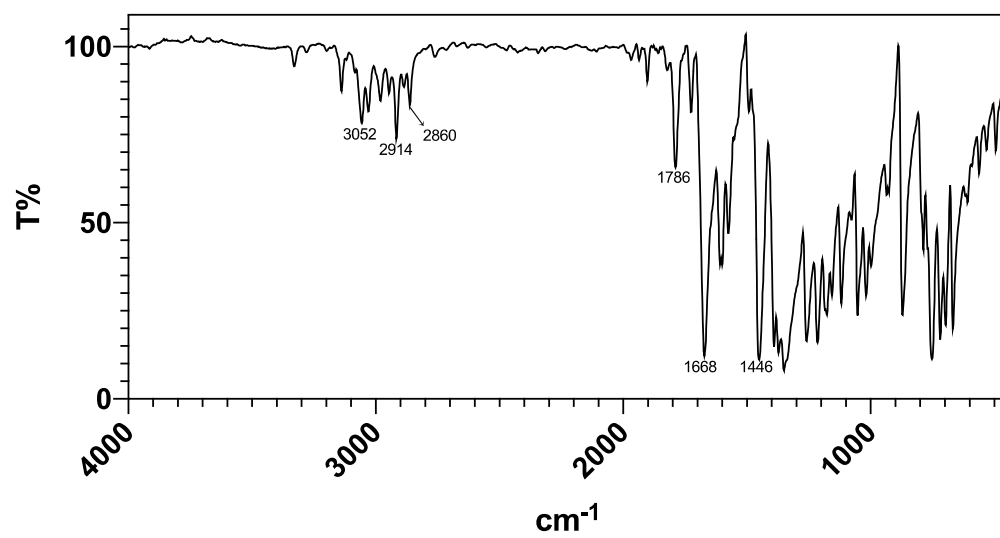

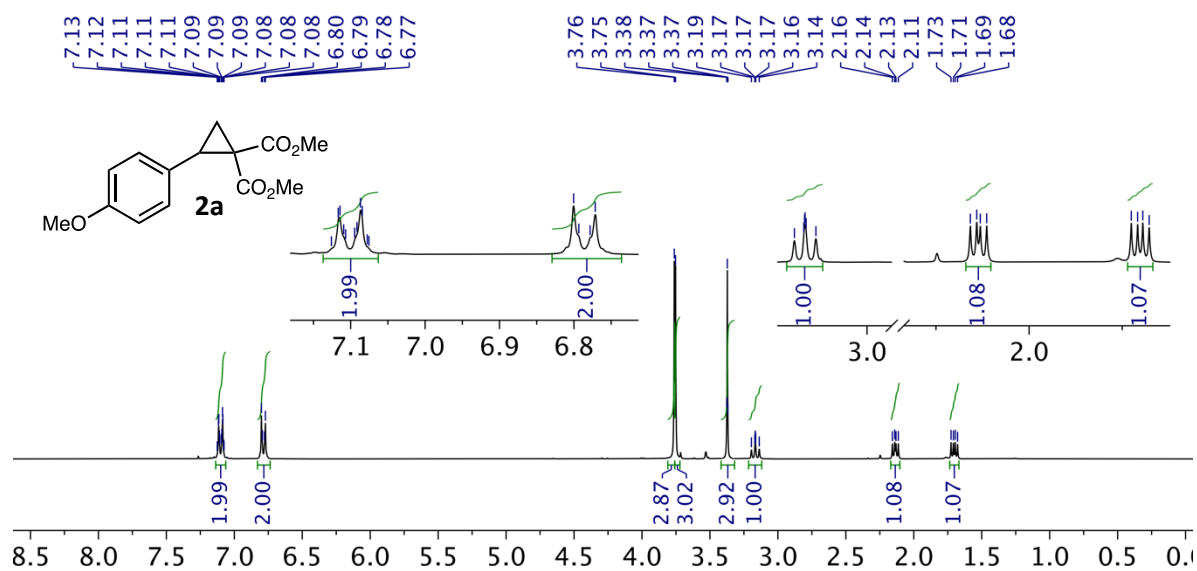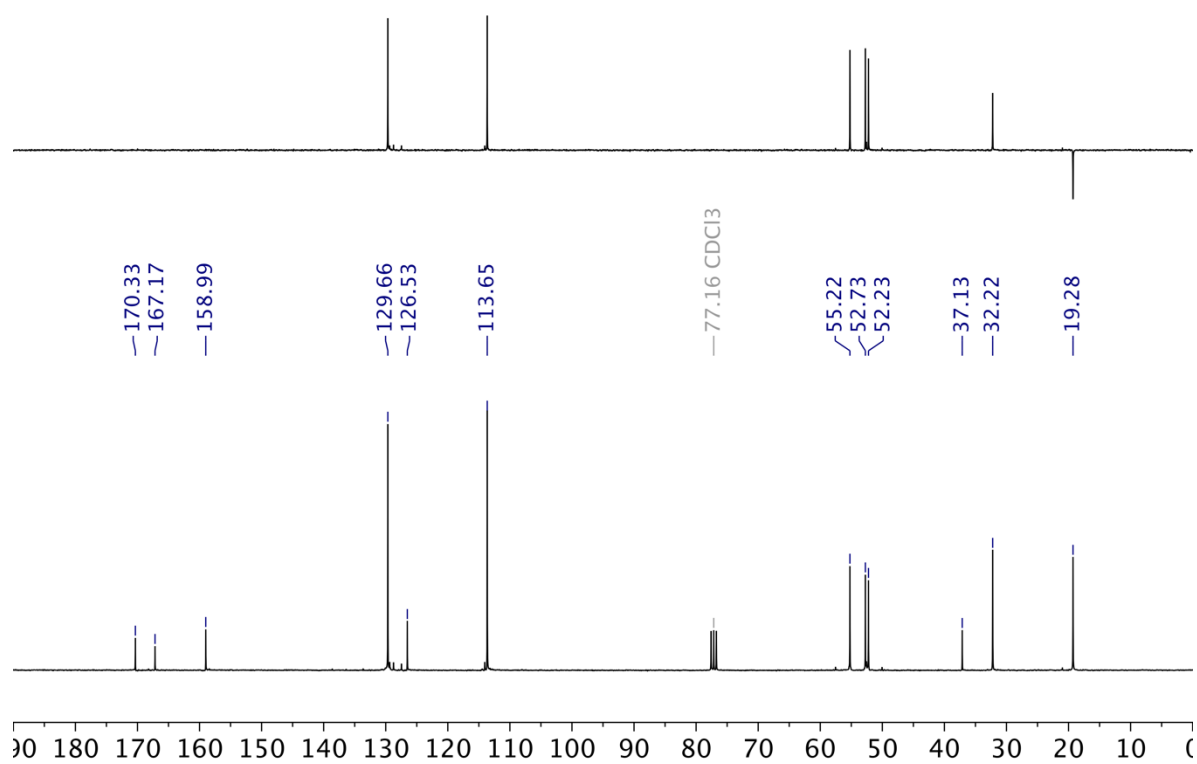

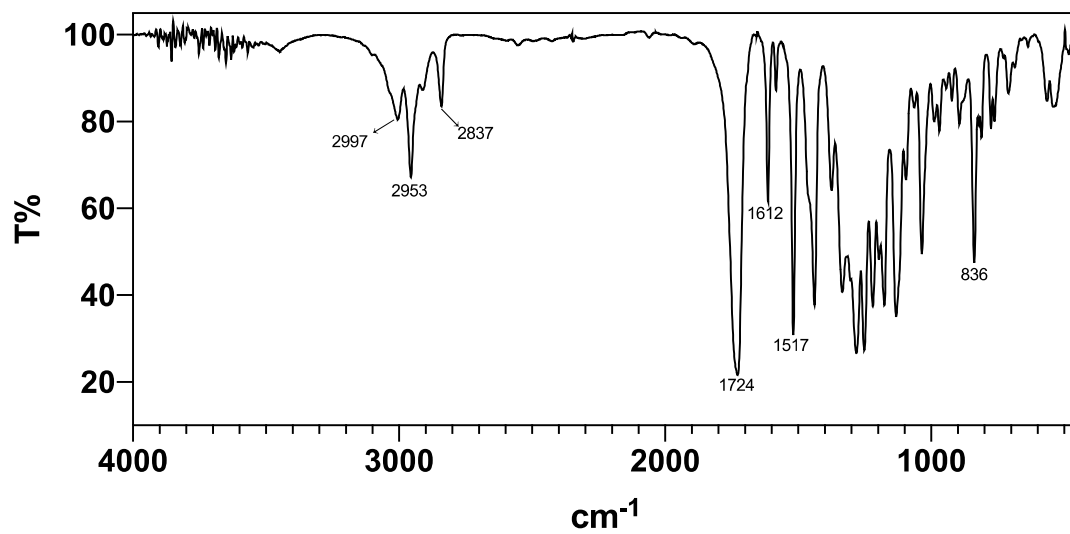

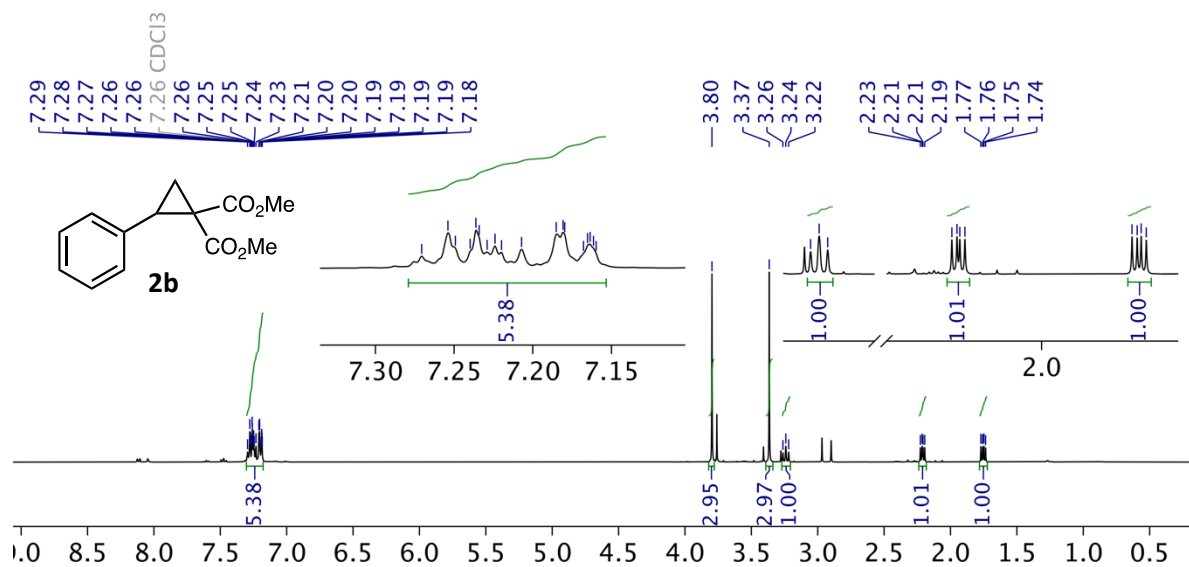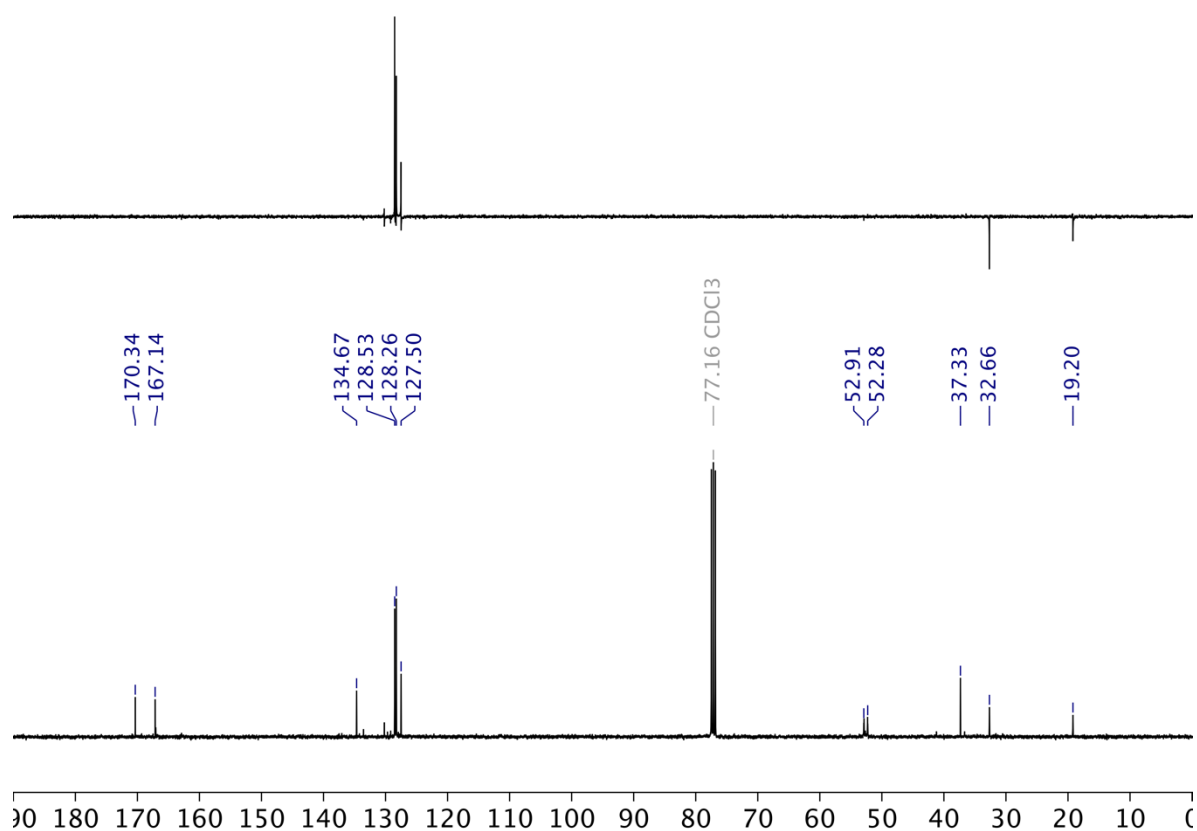

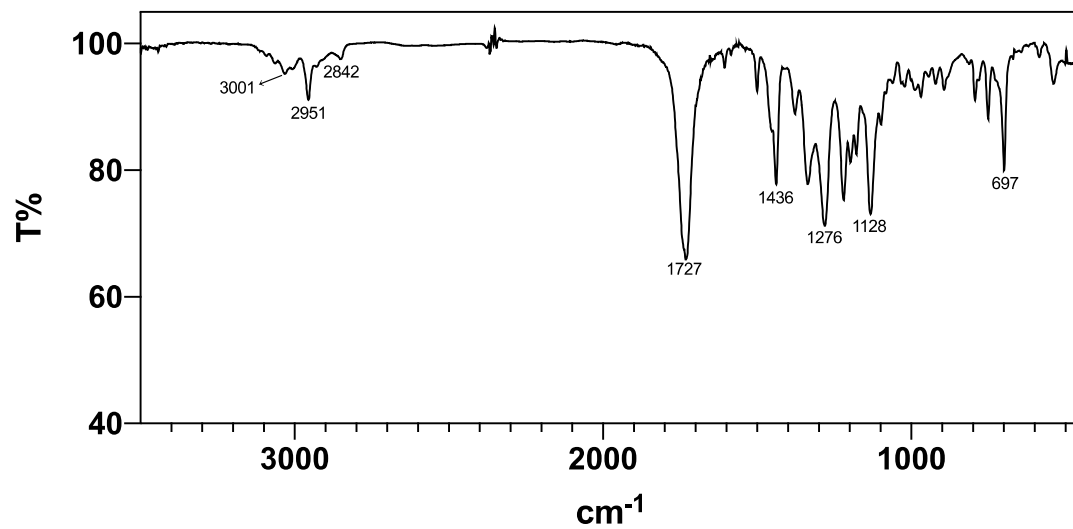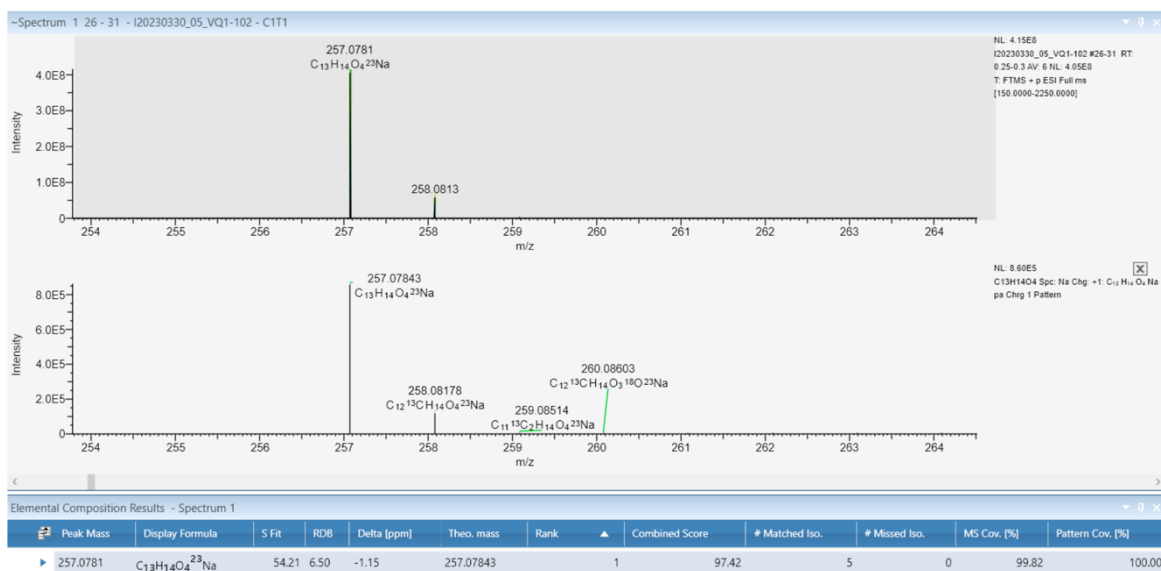

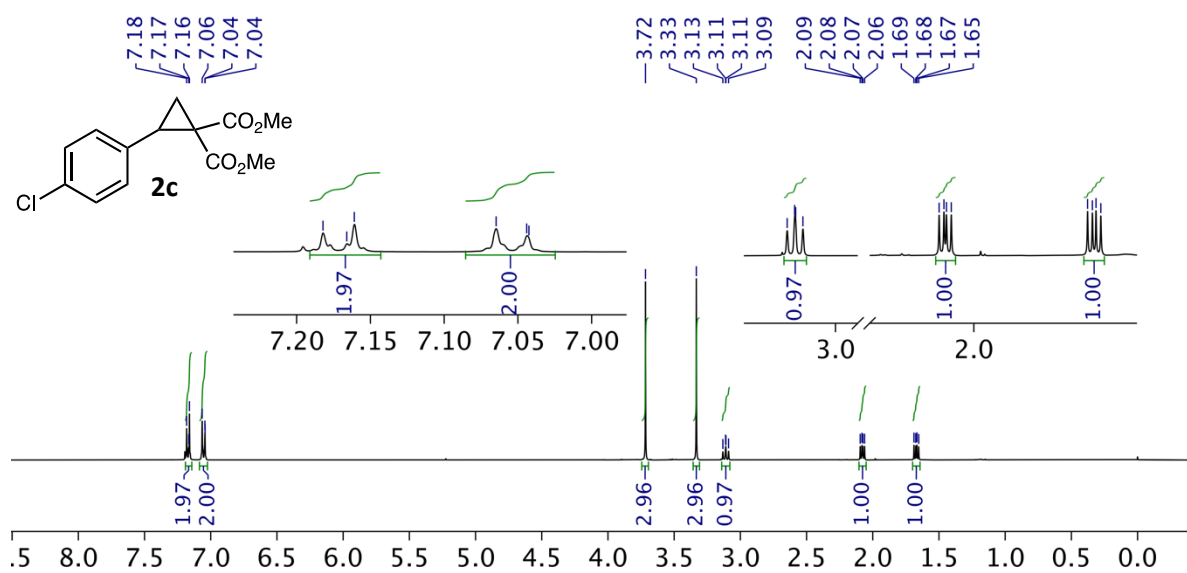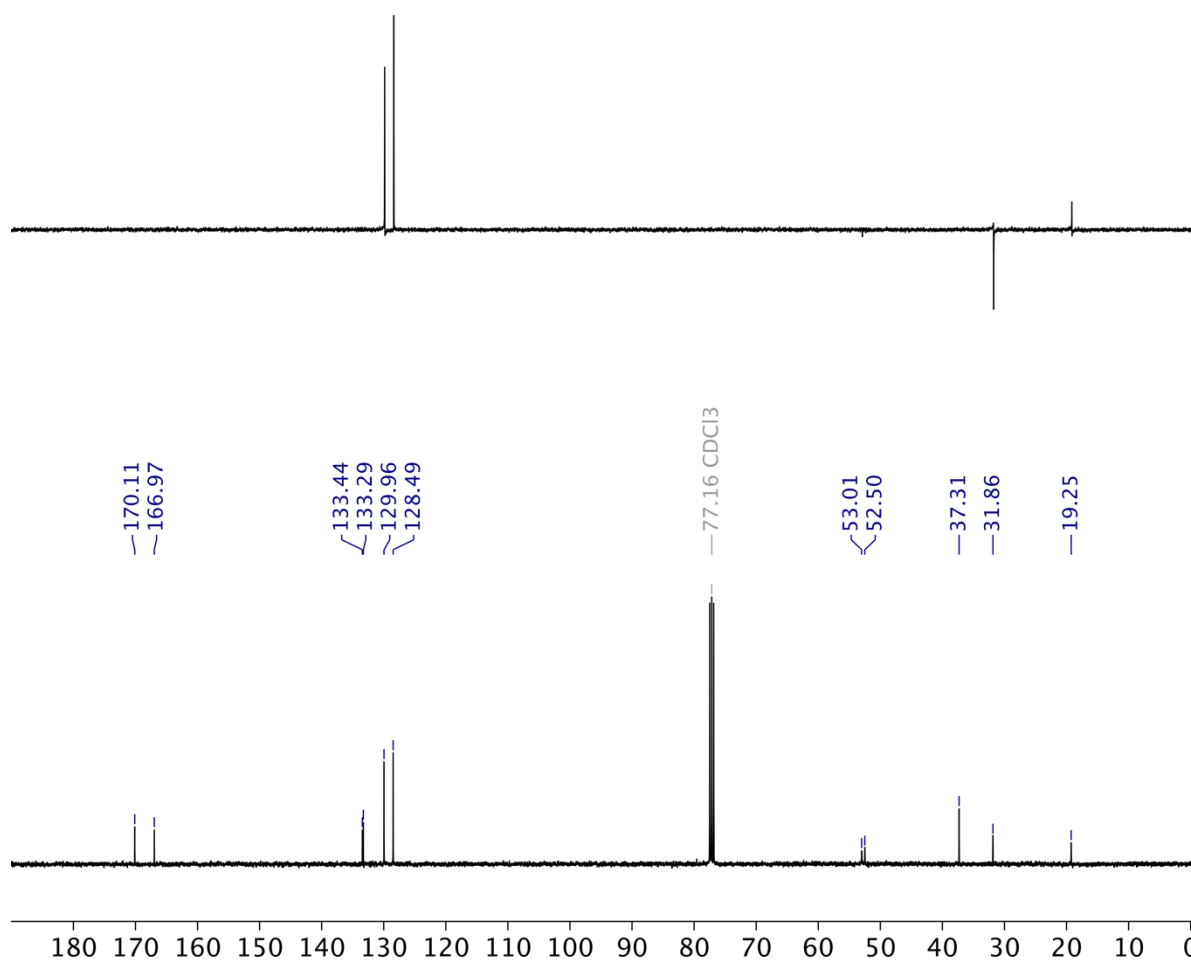



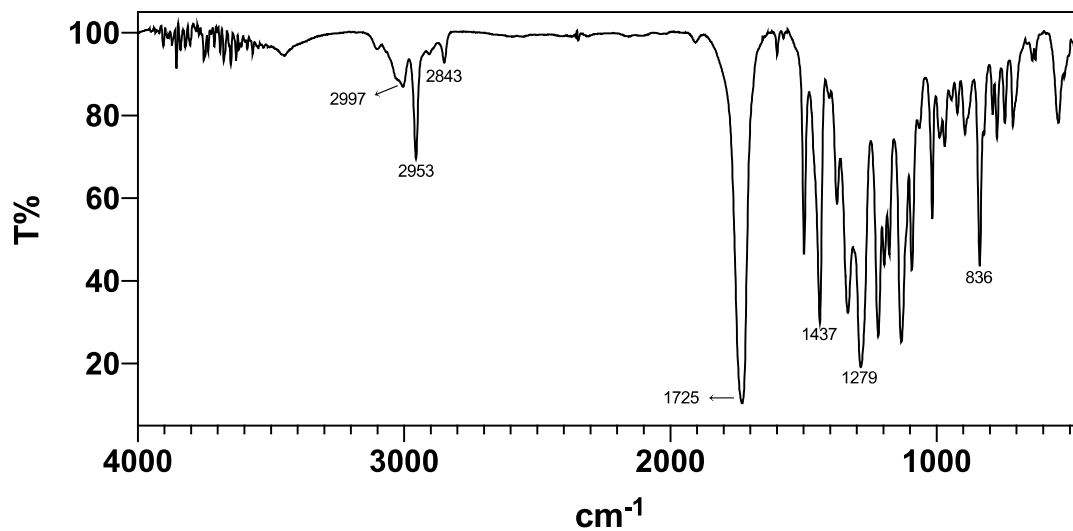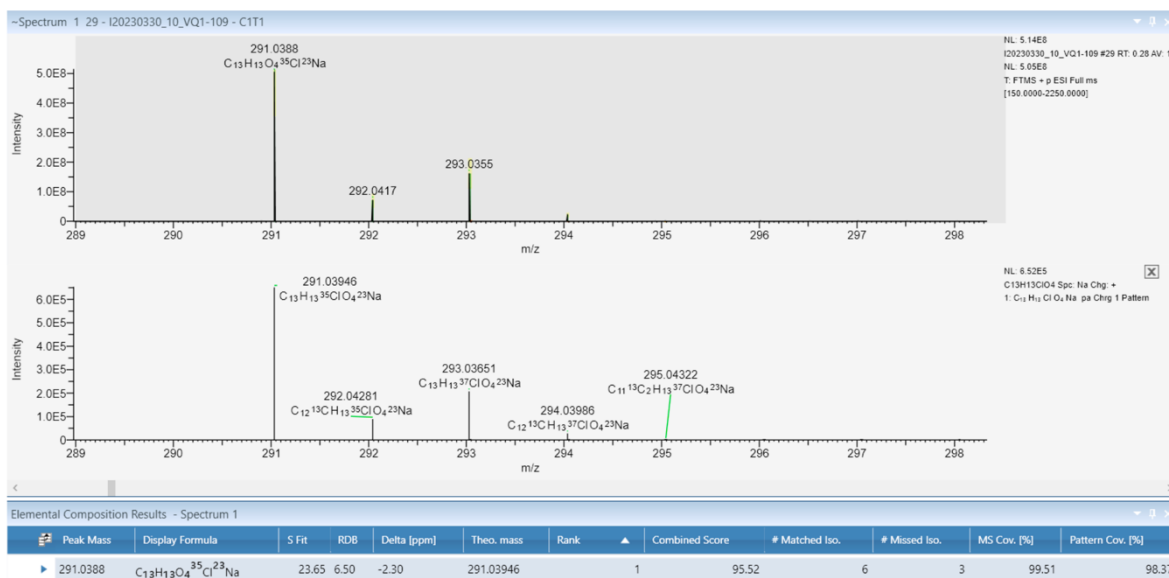

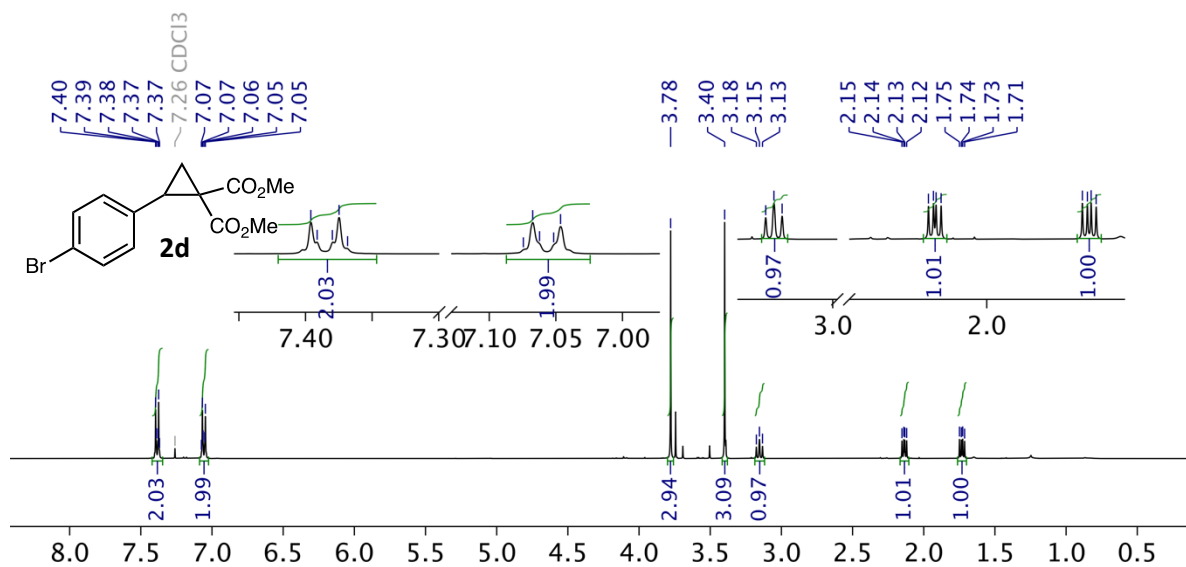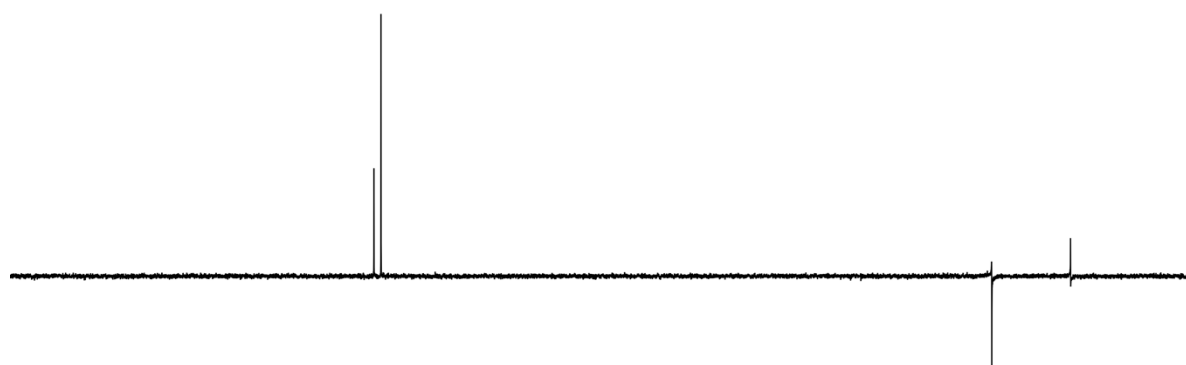

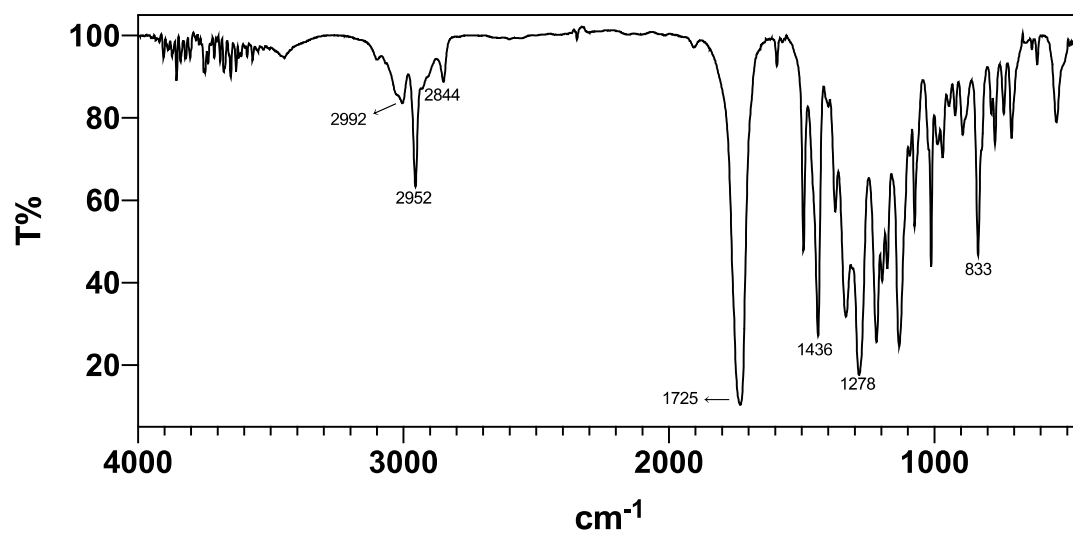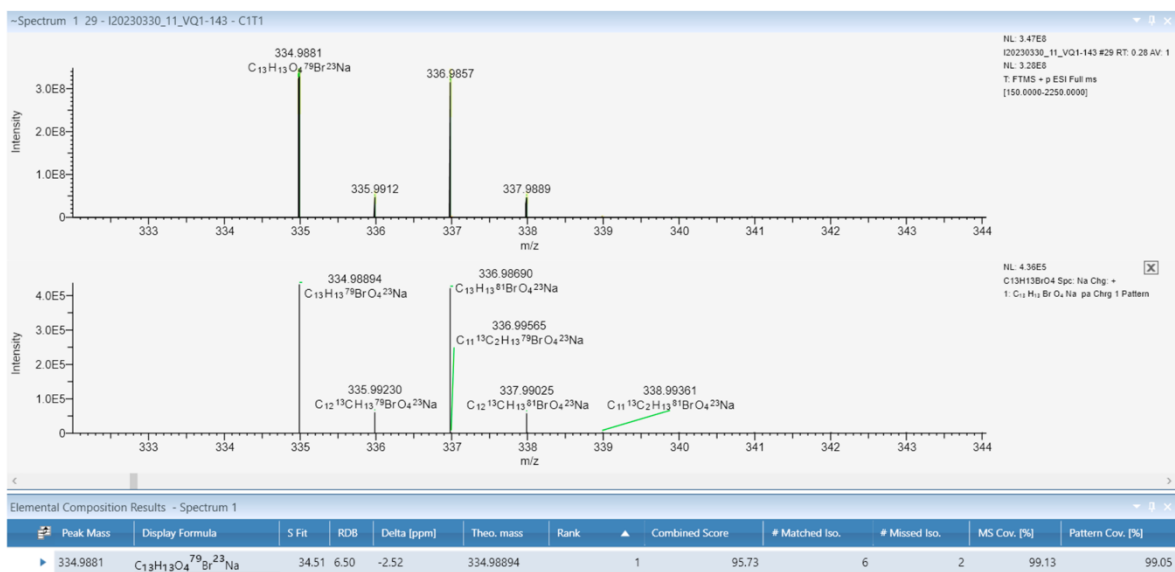

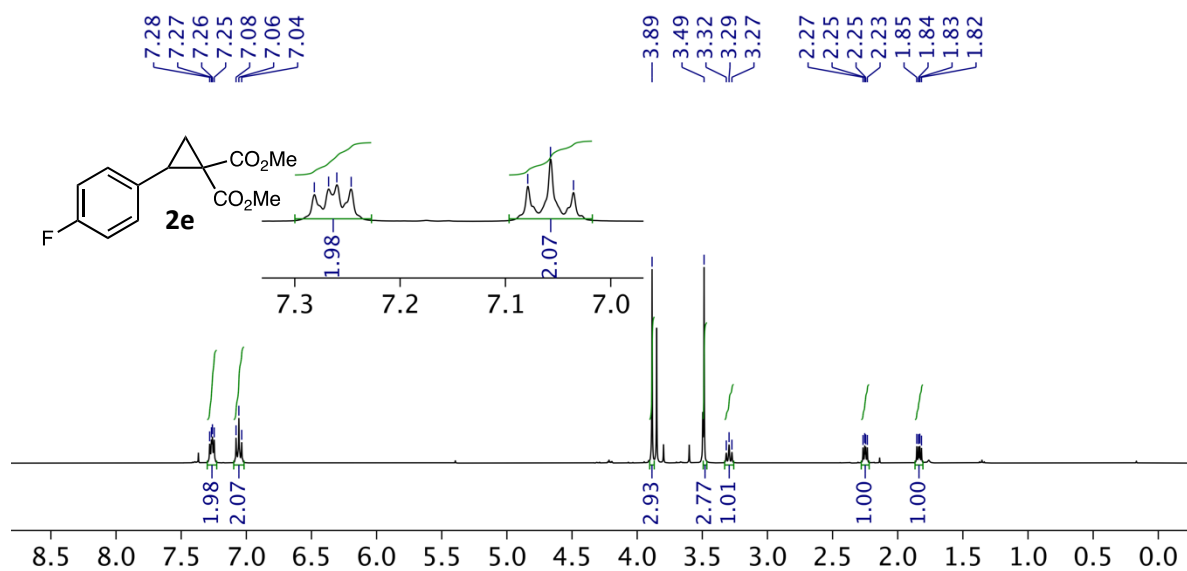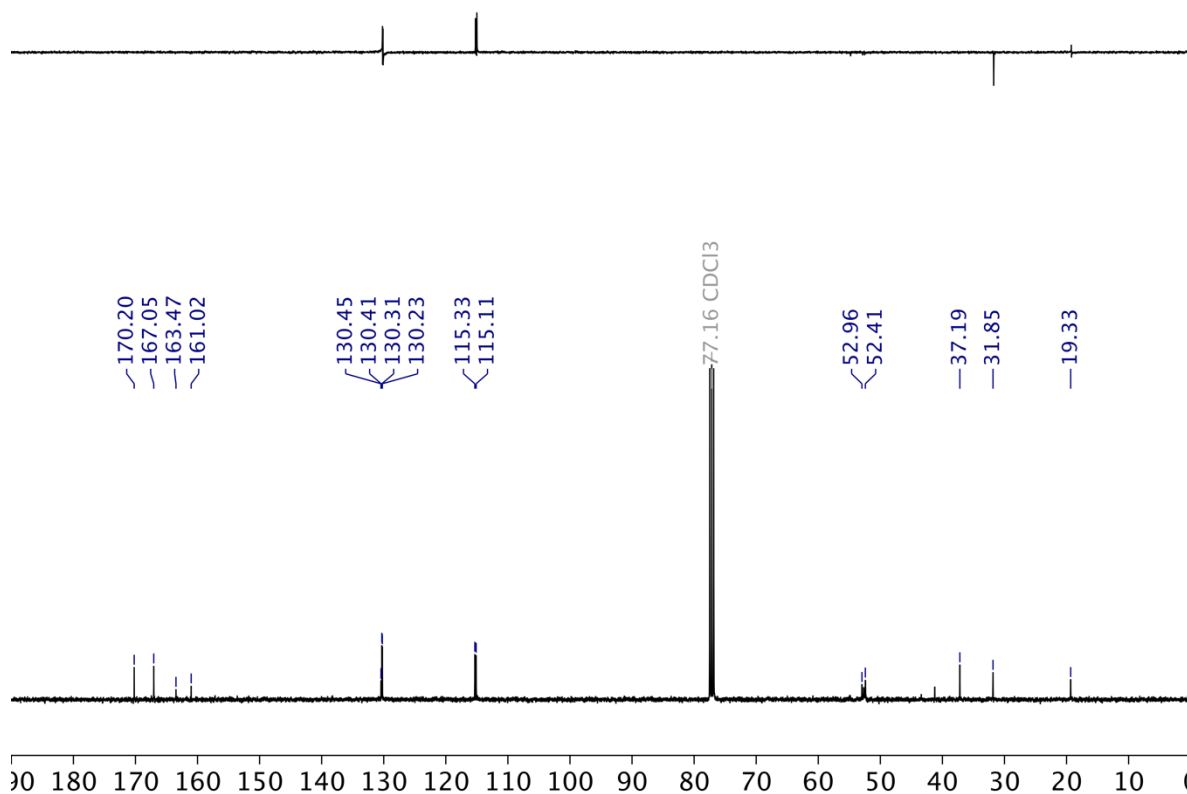

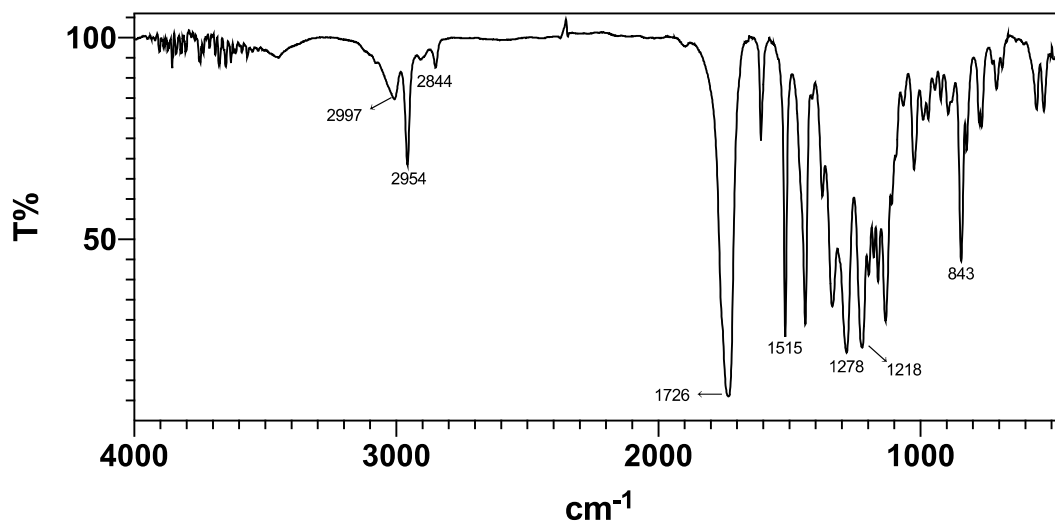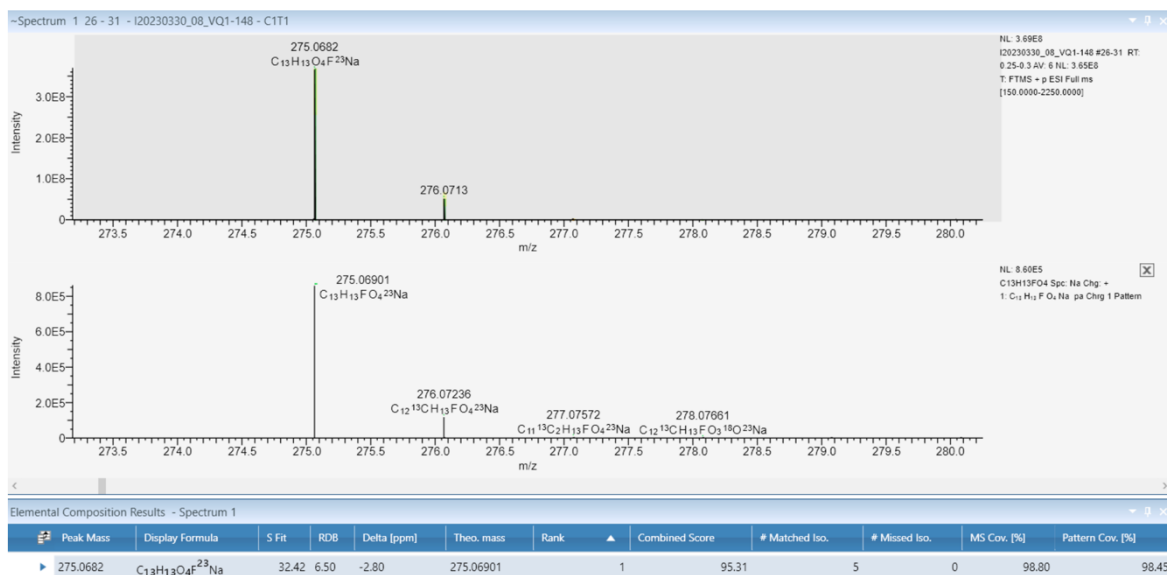

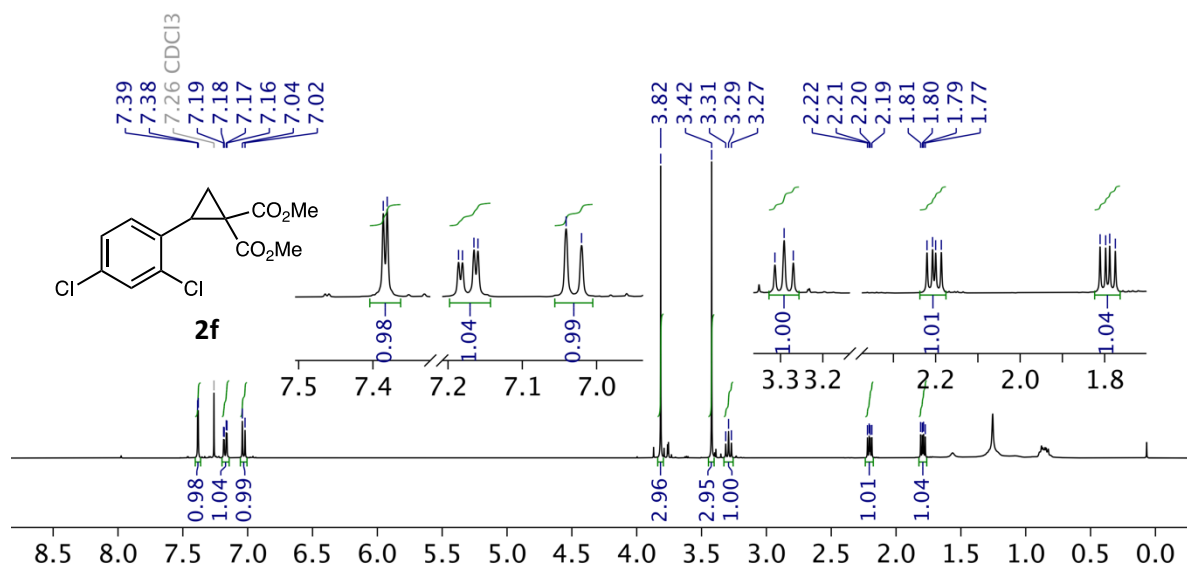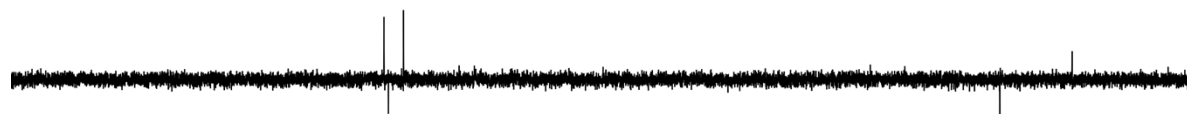

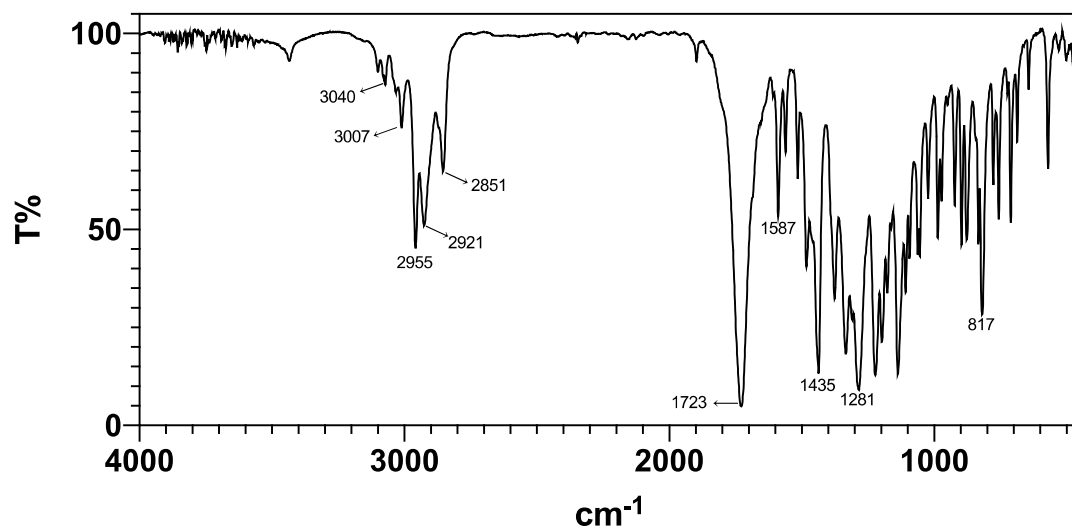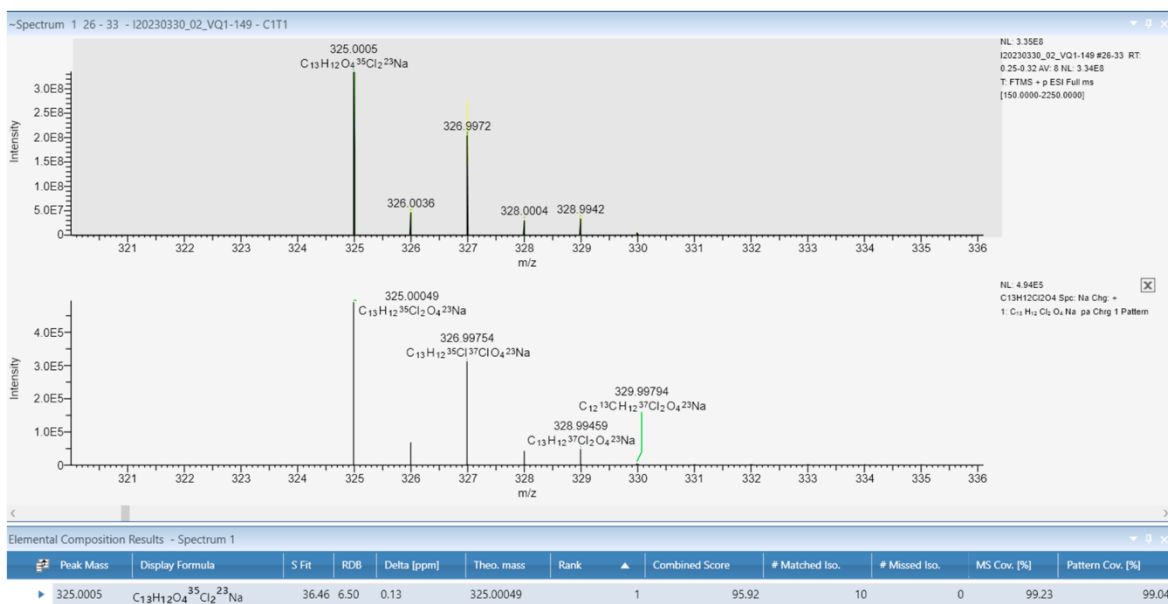

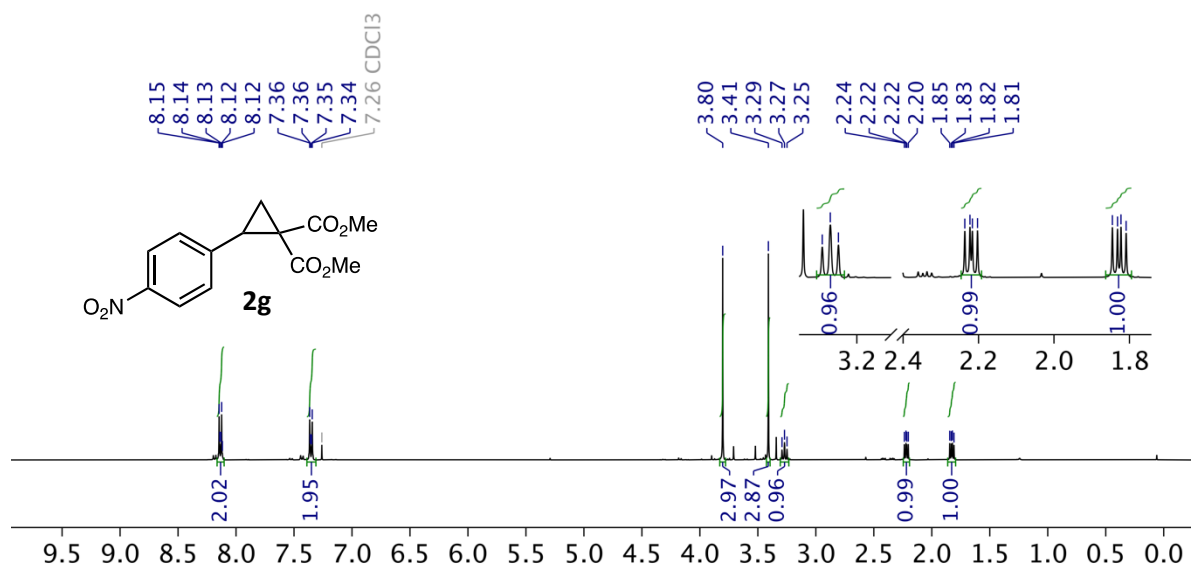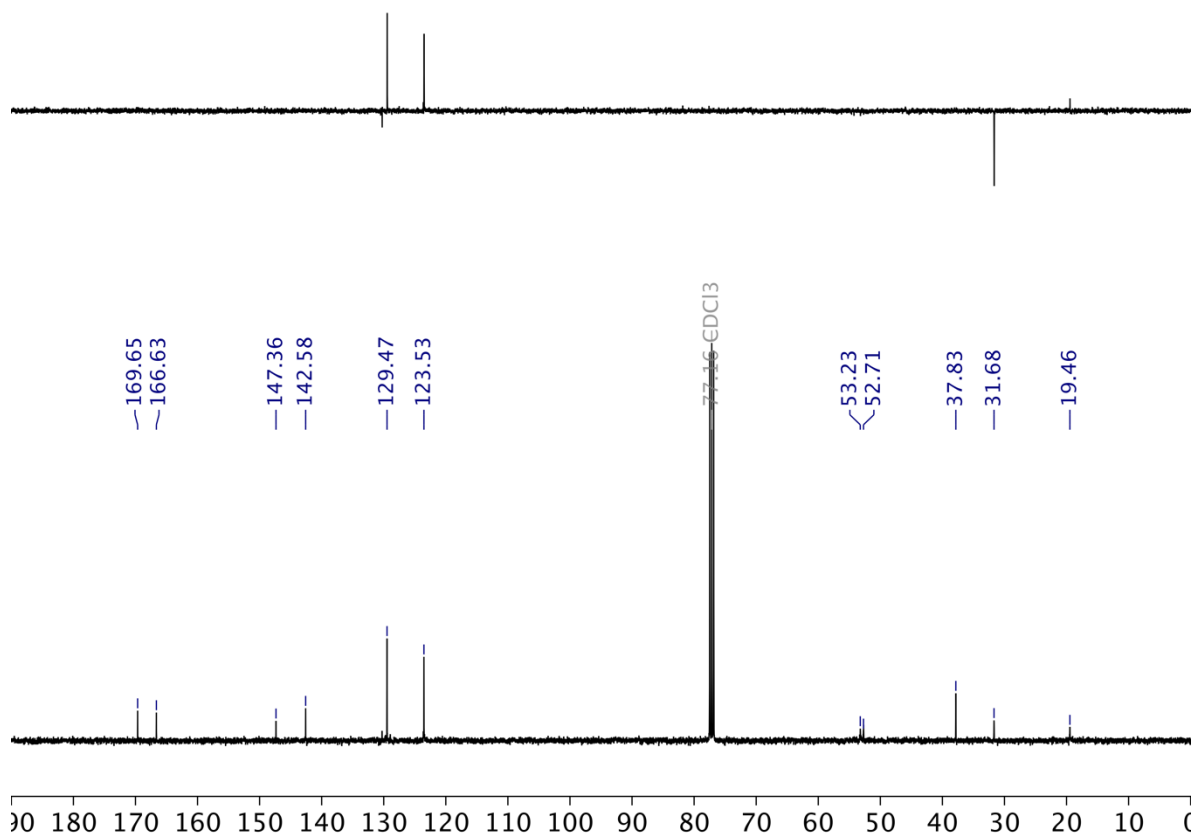



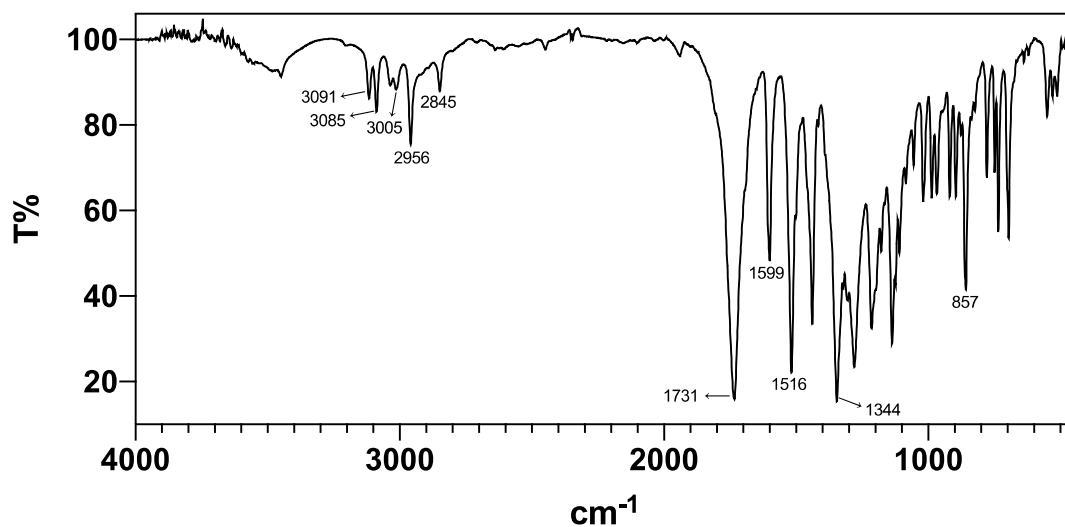

ThermoFisher Orbitrap: Exactive Plus with Extend Mass Range: Source HESI II

Ion Polarity: Positive

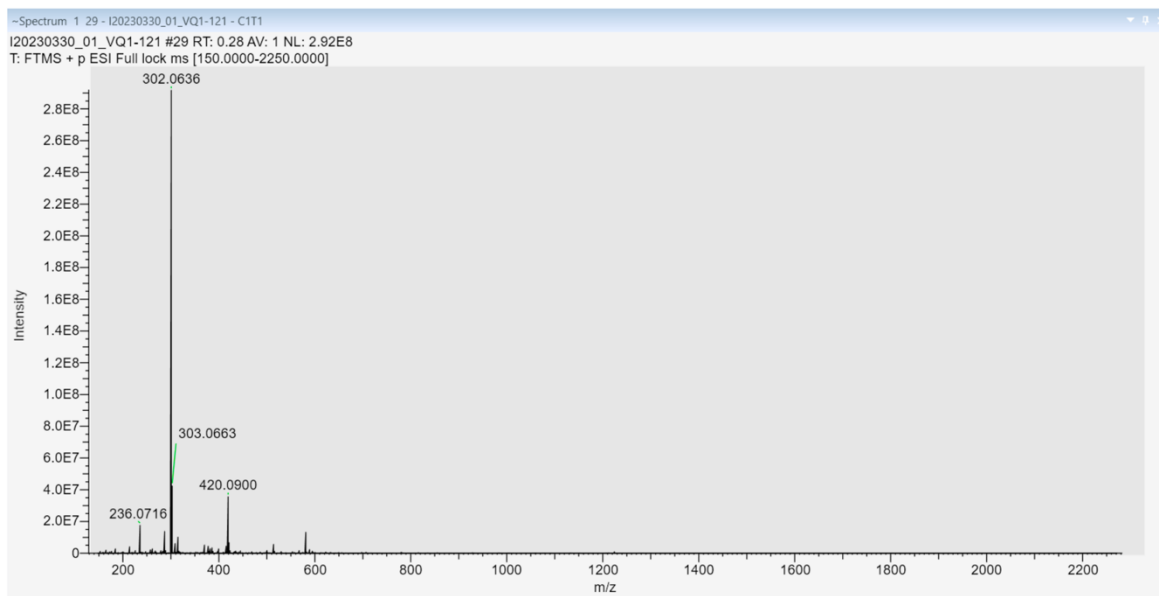

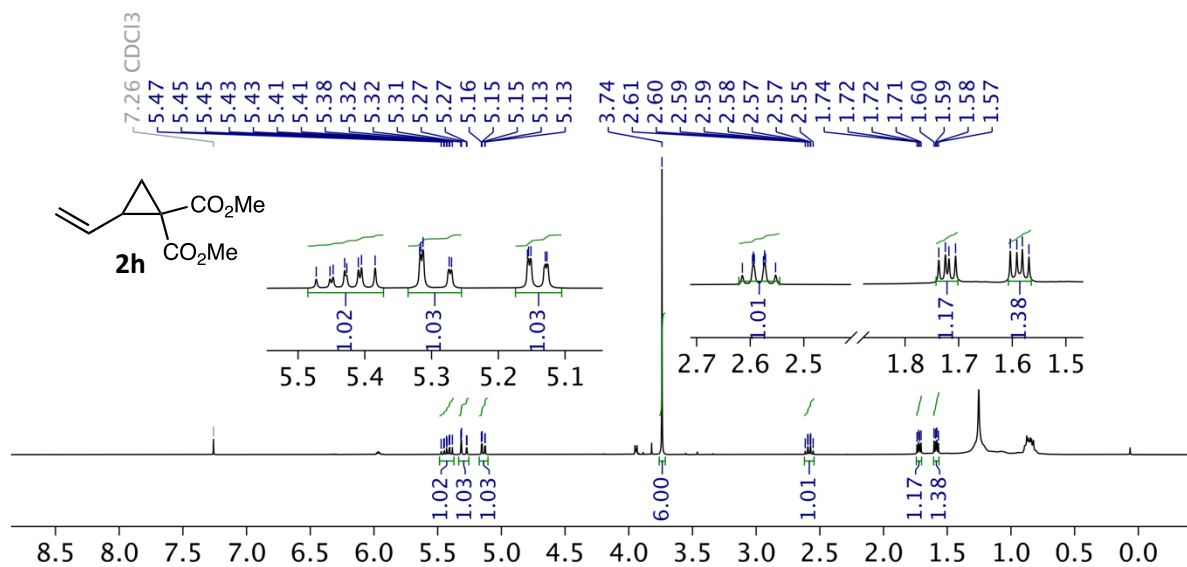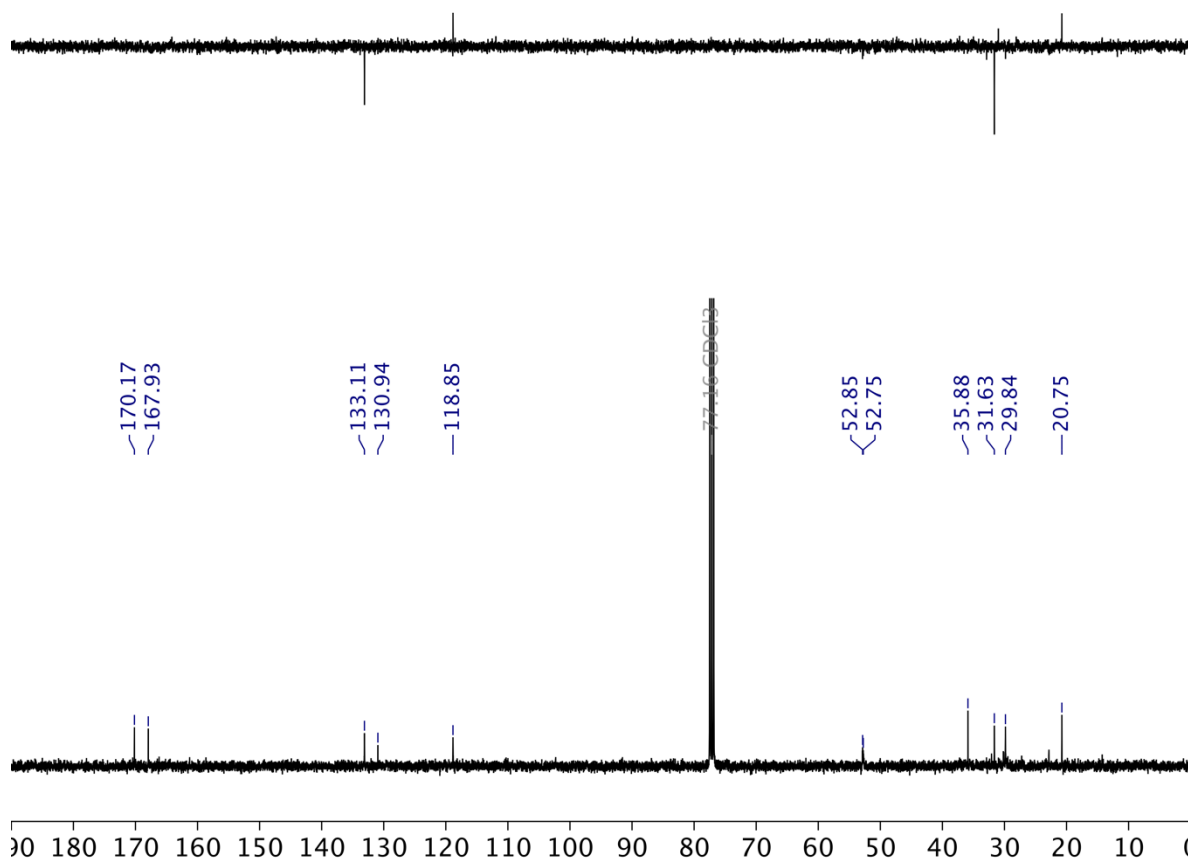

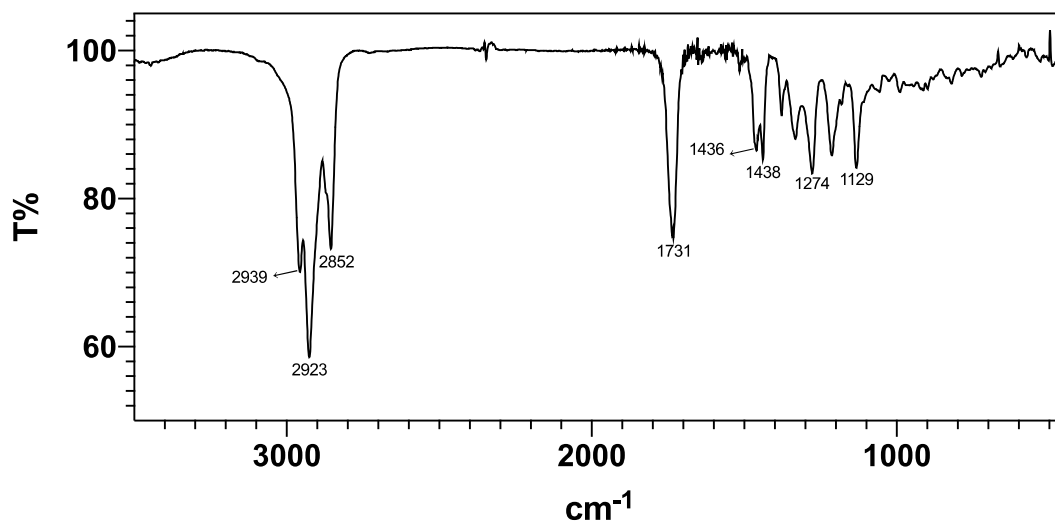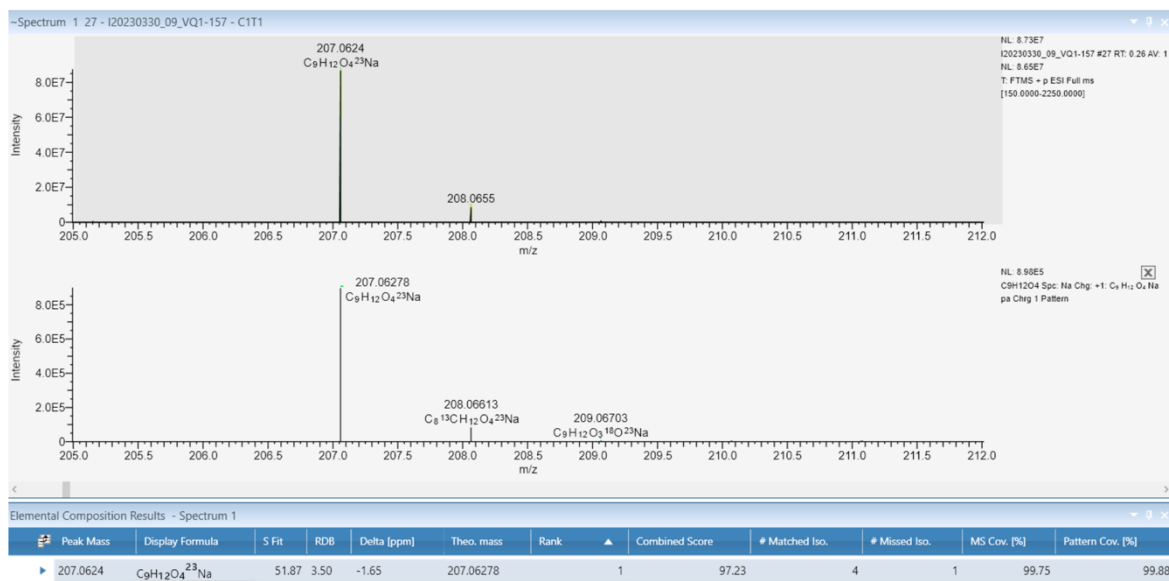

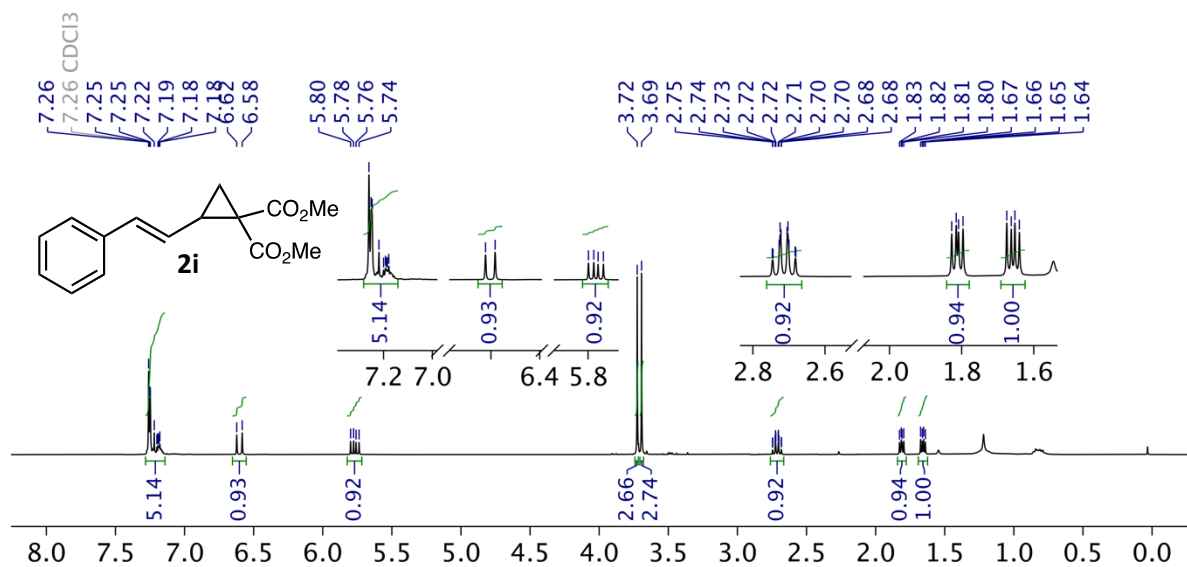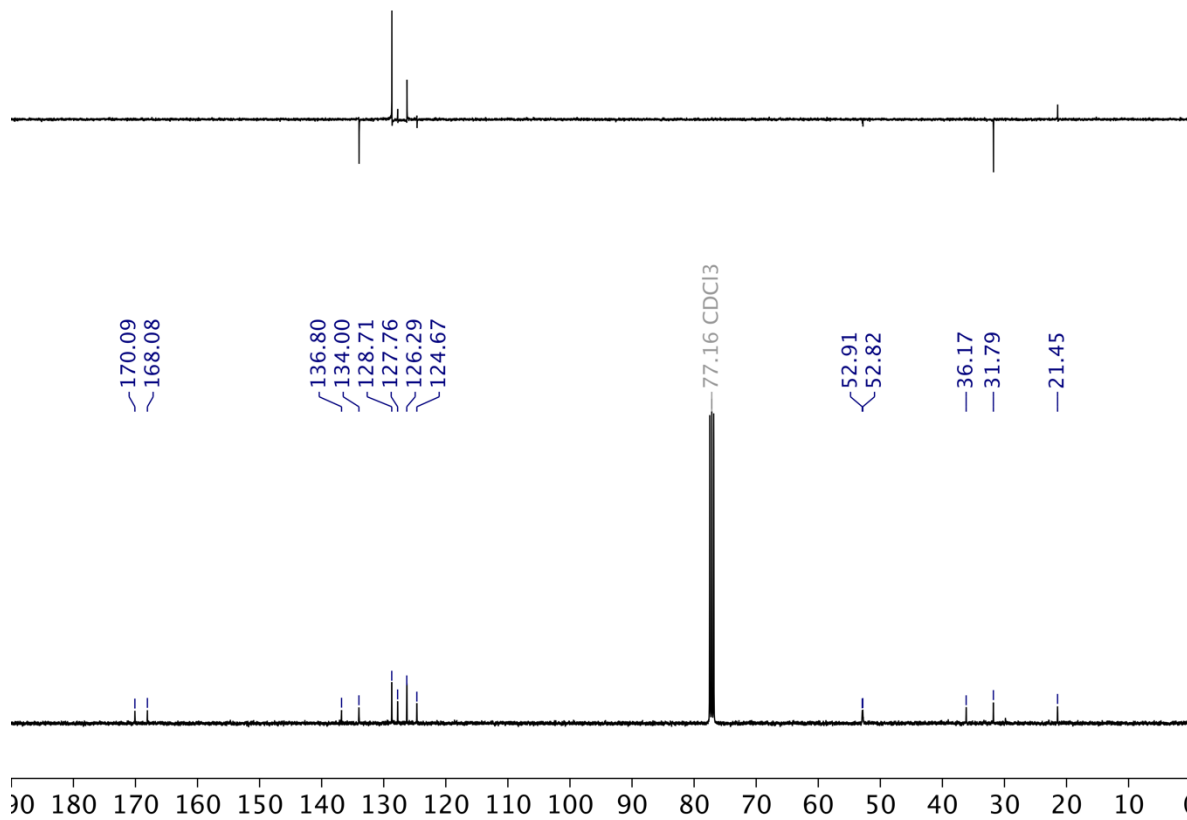

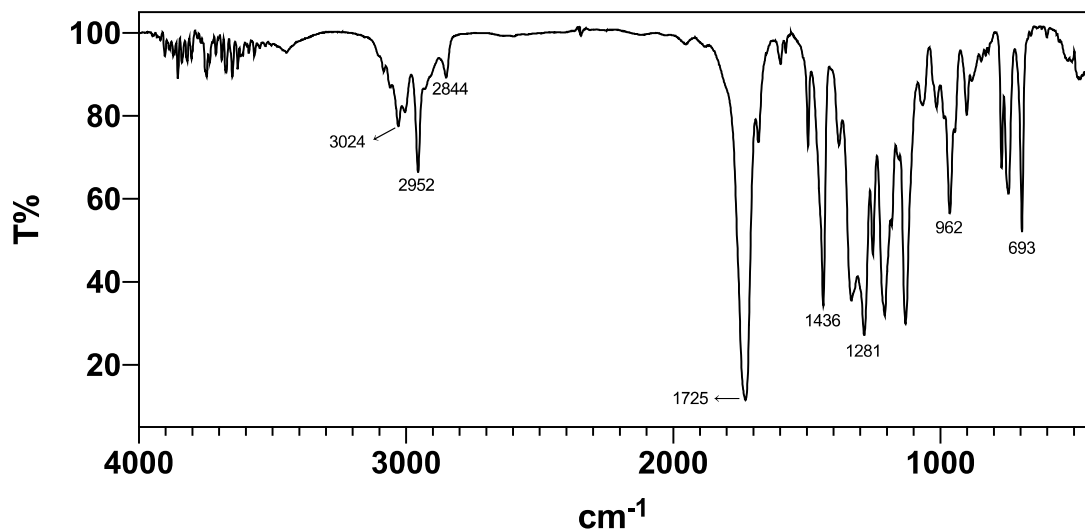

#### Acquisition Parameter

|             |          |              |          |                    |          |
|-------------|----------|--------------|----------|--------------------|----------|
| Source Type | ESI      | Ion Polarity | Positive | Set Corrector Fill | 48.2 V   |
| n/a         | n/a      | n/a          | n/a      | n/a                | n/a      |
| Scan Begin  | 50 m/z   | n/a          | n/a      | Set Reflector      | 1800.0 V |
| Scan End    | 3000 m/z | n/a          | n/a      | Set Flight Tube    | 8600.0 V |
|             |          |              |          | Set Detector TOF   | 2021.6 V |

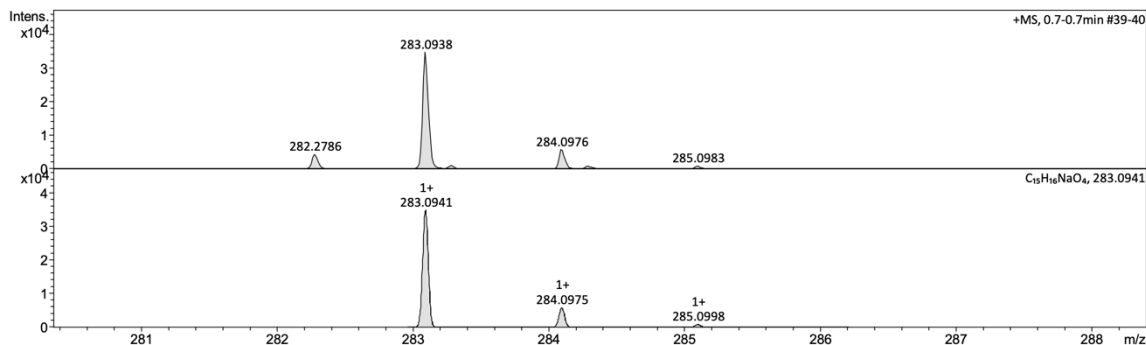

| Meas. m/z  | # | Ion Formula                                      | m/z err [ppm] | Mean err [ppm] | rdB  | N-Rule | e <sup>-</sup> | Conf | mSigma | Std I | Std Mean | m/z  | Std I | VarNorm | Std m/z | Diff | Std Comb | Dev  |
|------------|---|--------------------------------------------------|---------------|----------------|------|--------|----------------|------|--------|-------|----------|------|-------|---------|---------|------|----------|------|
| 283.093844 | 1 | C <sub>15</sub> H <sub>16</sub> NaO <sub>4</sub> | 283.094080    | 0.8            | -8.4 | 7.5    | ok             | even | 2.8    | 4.1   | n.a.     | n.a. | n.a.  | n.a.    | n.a.    | n.a. | n.a.     | n.a. |



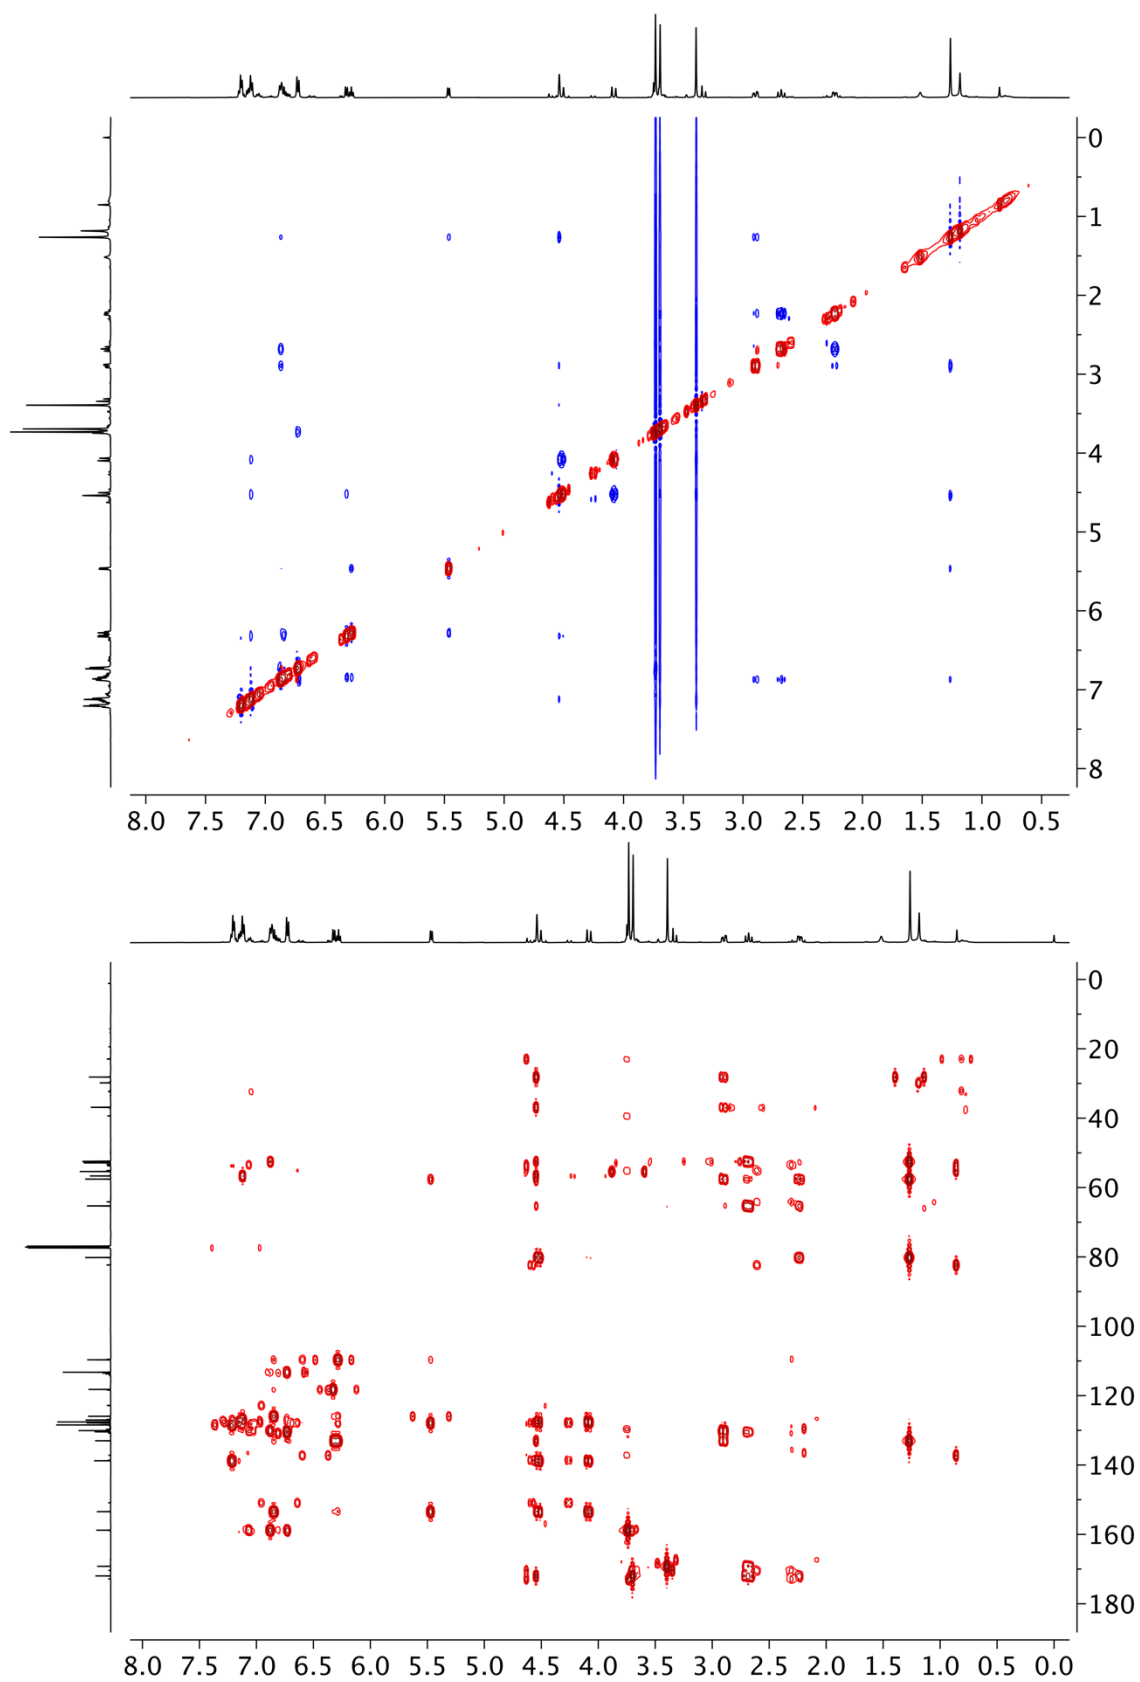

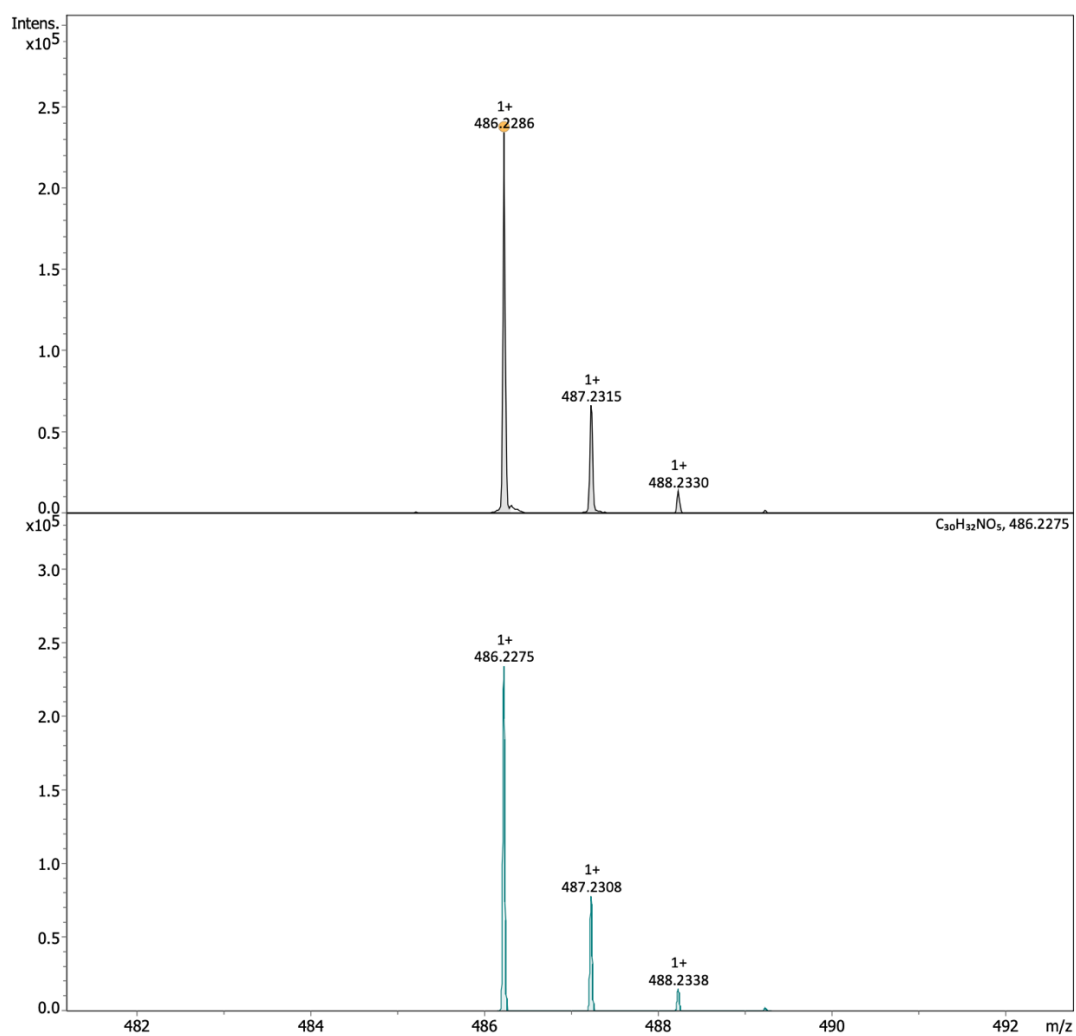



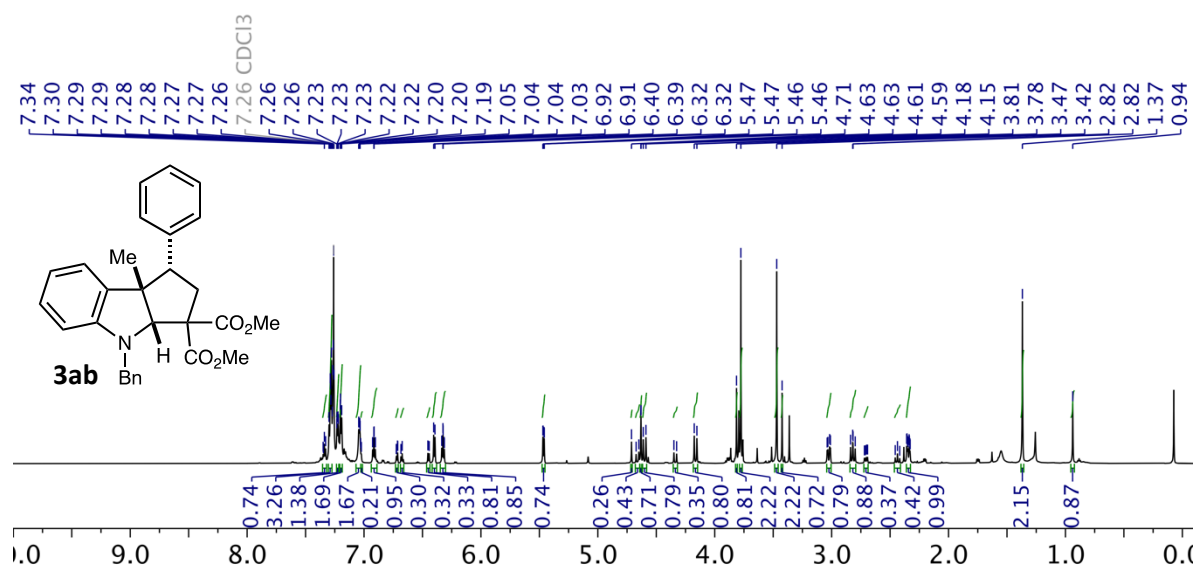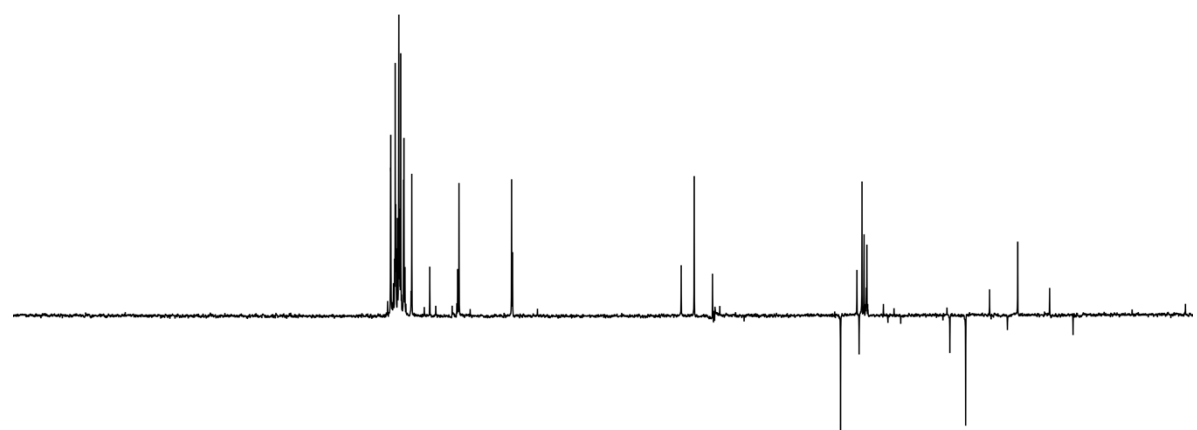

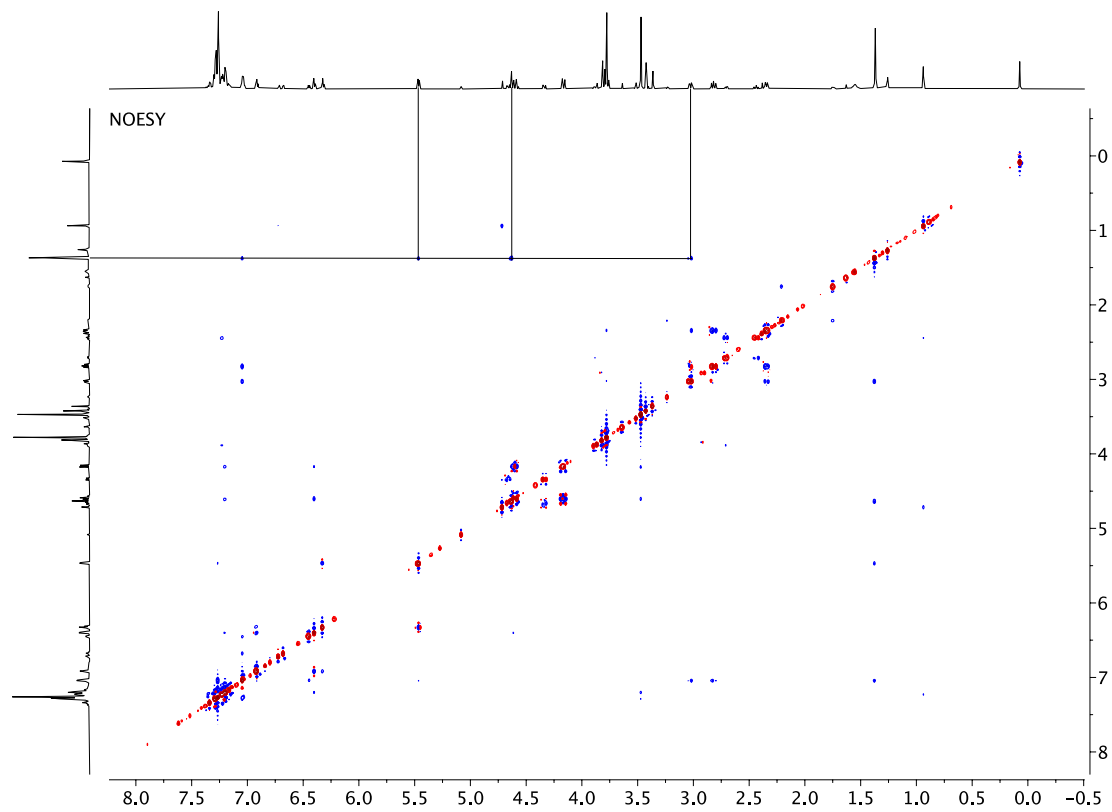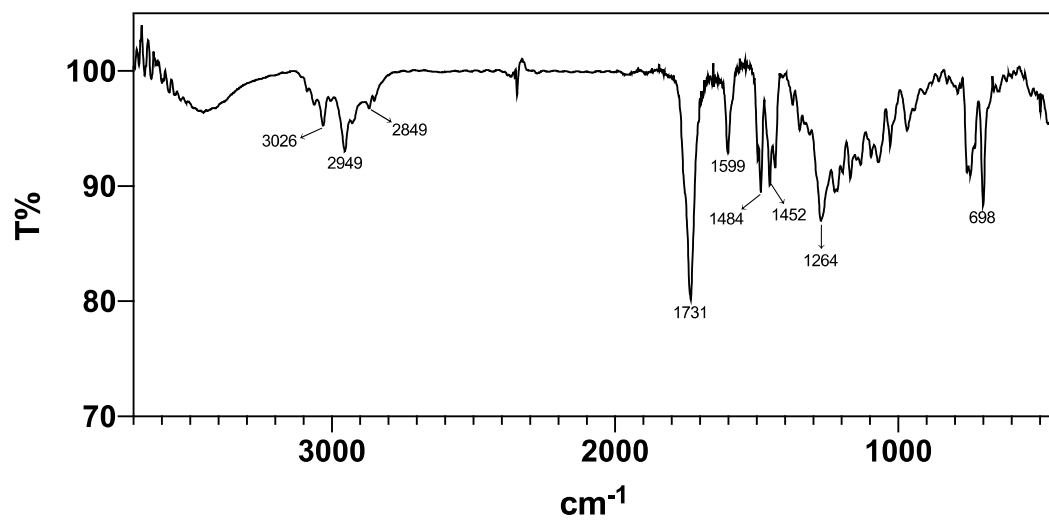

**Acquisition Parameter**

|             |          |                    |          |                    |        |
|-------------|----------|--------------------|----------|--------------------|--------|
| Source Type | ESI      | Ion Polarity       | Positive | Set Corrector Fill | 74 V   |
| n/a         | n/a      | Set Capillary Exit | 80.0 V   | Set Pulsar Pull    | 799 V  |
| Scan Begin  | 50 m/z   | Set Hexapole RF    | 60.0 V   | Set Pulsar Push    | 799 V  |
| Scan End    | 3000 m/z | Set Skimmer 1      | 50.0 V   | Set Reflector      | 1700 V |
|             |          | Set Hexapole 1     | 24.3 V   | Set Flight Tube    | 8600 V |
|             |          |                    |          | Set Detector TOF   | 2311 V |

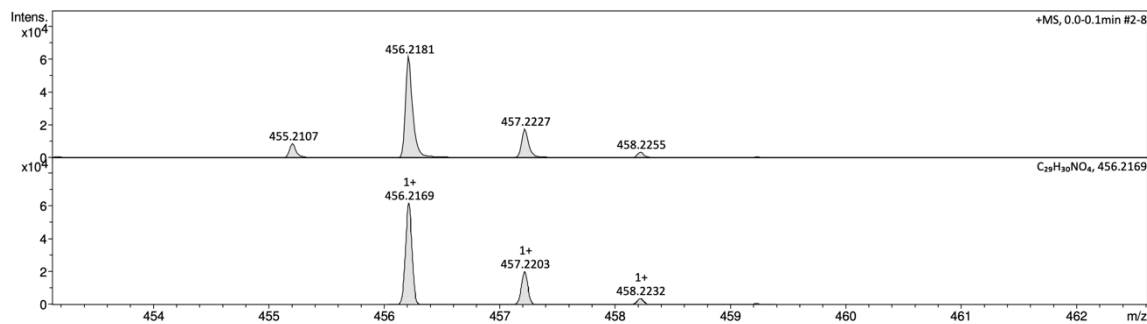

| Meas. m/z | # | Ion Formula                                     | m/z      | err [ppm] | mSigma | # mSigma | Score  | rdb  | e <sup>-</sup> | Conf | N-Rule |
|-----------|---|-------------------------------------------------|----------|-----------|--------|----------|--------|------|----------------|------|--------|
| 456.2181  | 1 | C <sub>29</sub> H <sub>30</sub> NO <sub>4</sub> | 456.2169 | -2.5      | 19.8   | 1        | 100.00 | 15.5 | even           |      | ok     |

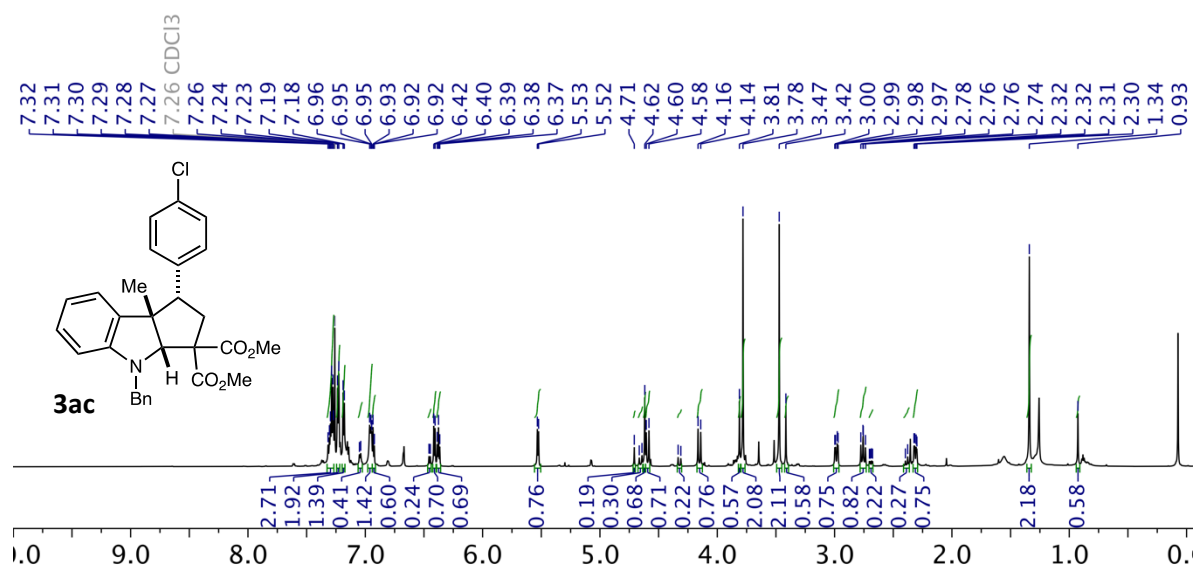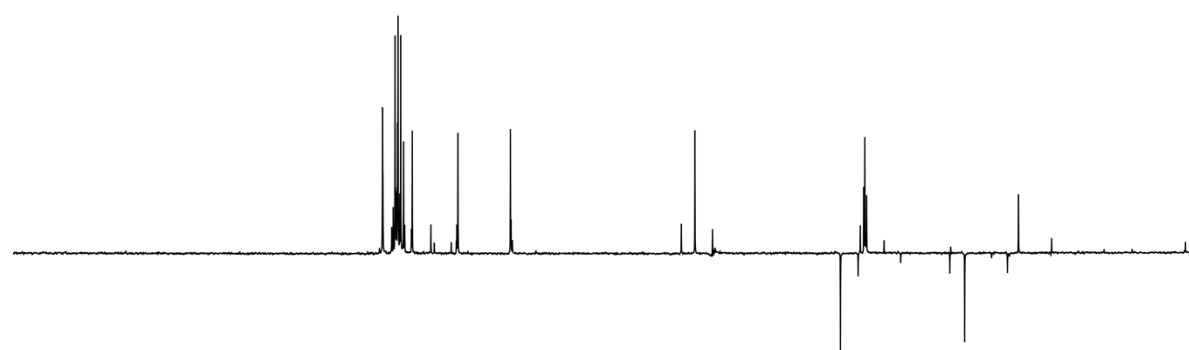

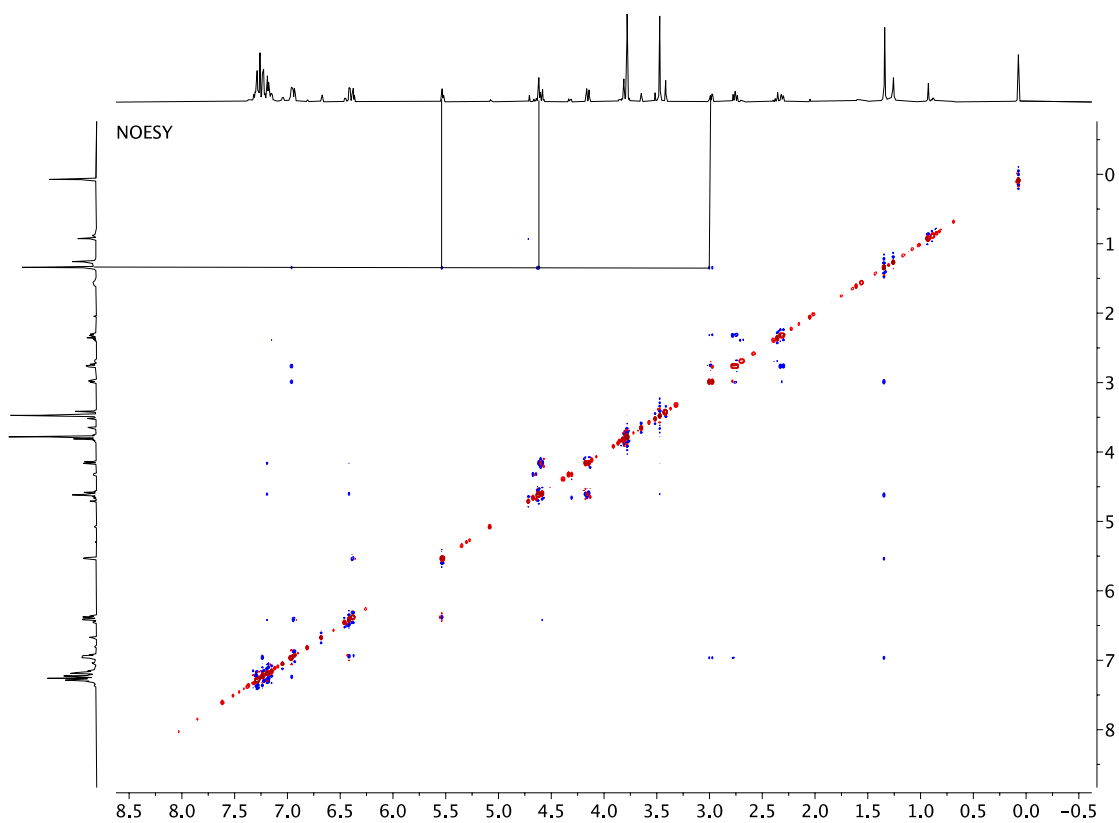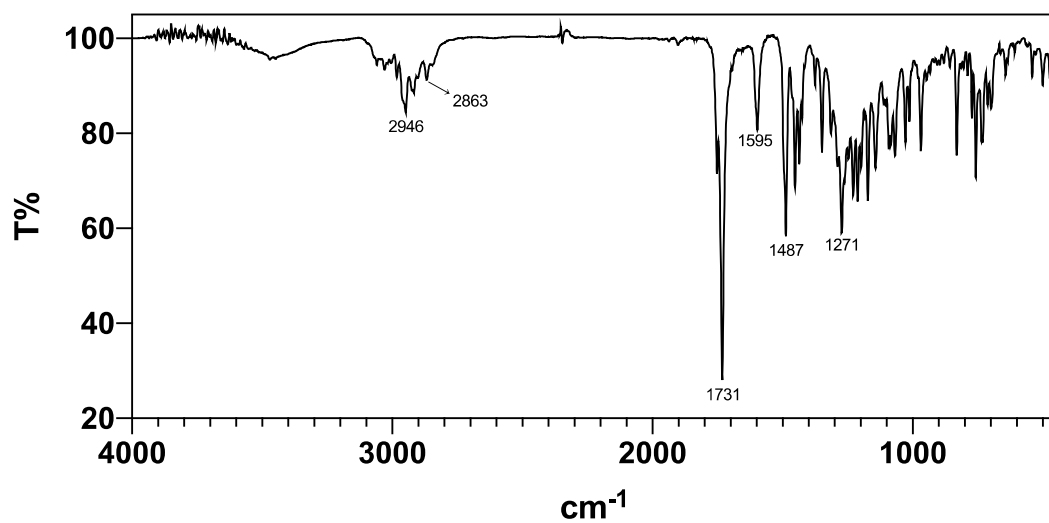

| Acquisition Parameter |          |                    |          |                    |        |
|-----------------------|----------|--------------------|----------|--------------------|--------|
| Source Type           | ESI      | Ion Polarity       | Positive | Set Corrector Fill | 74 V   |
| n/a                   | n/a      | Set Capillary Exit | 80.0 V   | Set Pulsar Pull    | 799 V  |
| Scan Begin            | 50 m/z   | Set Hexapole RF    | 60.0 V   | Set Pulsar Push    | 799 V  |
| Scan End              | 3000 m/z | Set Skimmer 1      | 50.0 V   | Set Reflector      | 1700 V |
|                       |          | Set Hexapole 1     | 24.3 V   | Set Flight Tube    | 8600 V |
|                       |          |                    |          | Set Detector TOF   | 2311 V |

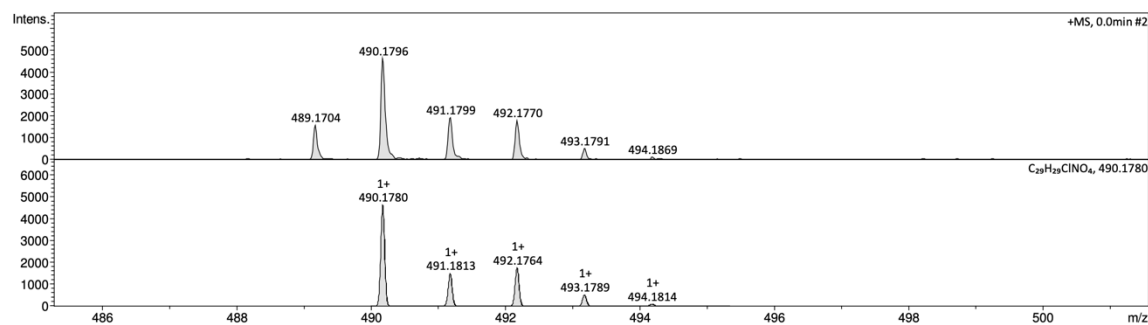

| Meas. m/z | # | Ion Formula                                       | m/z      | err [ppm] | mSigma | # mSigma | Score  | rdb  | e <sup>-</sup> Conf | N-Rule |
|-----------|---|---------------------------------------------------|----------|-----------|--------|----------|--------|------|---------------------|--------|
| 490.1796  | 1 | C <sub>29</sub> H <sub>29</sub> ClNO <sub>4</sub> | 490.1780 | -3.4      | 42.3   | 1        | 100.00 | 15.5 | even                | ok     |

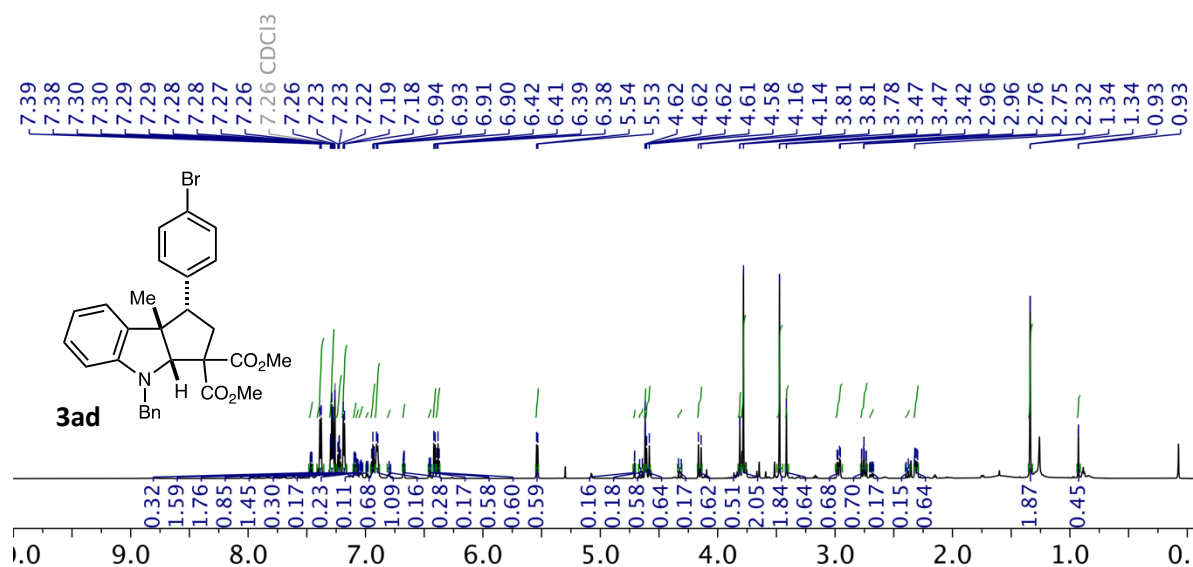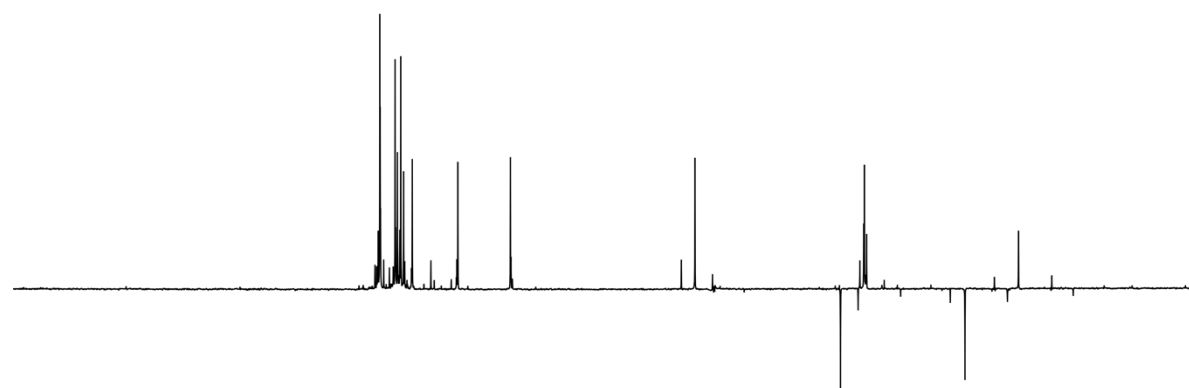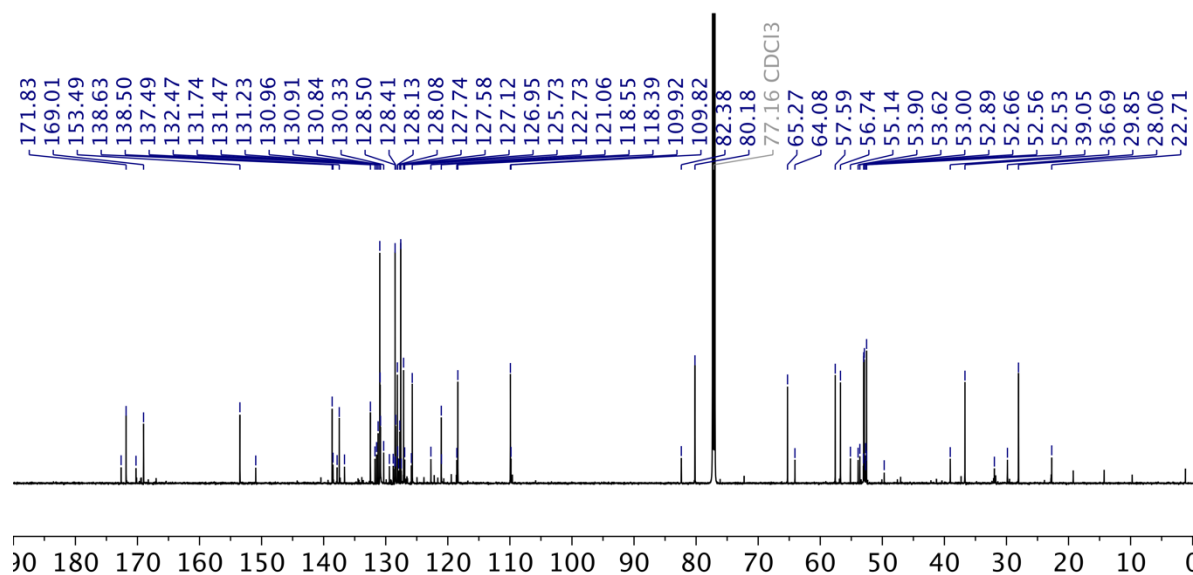

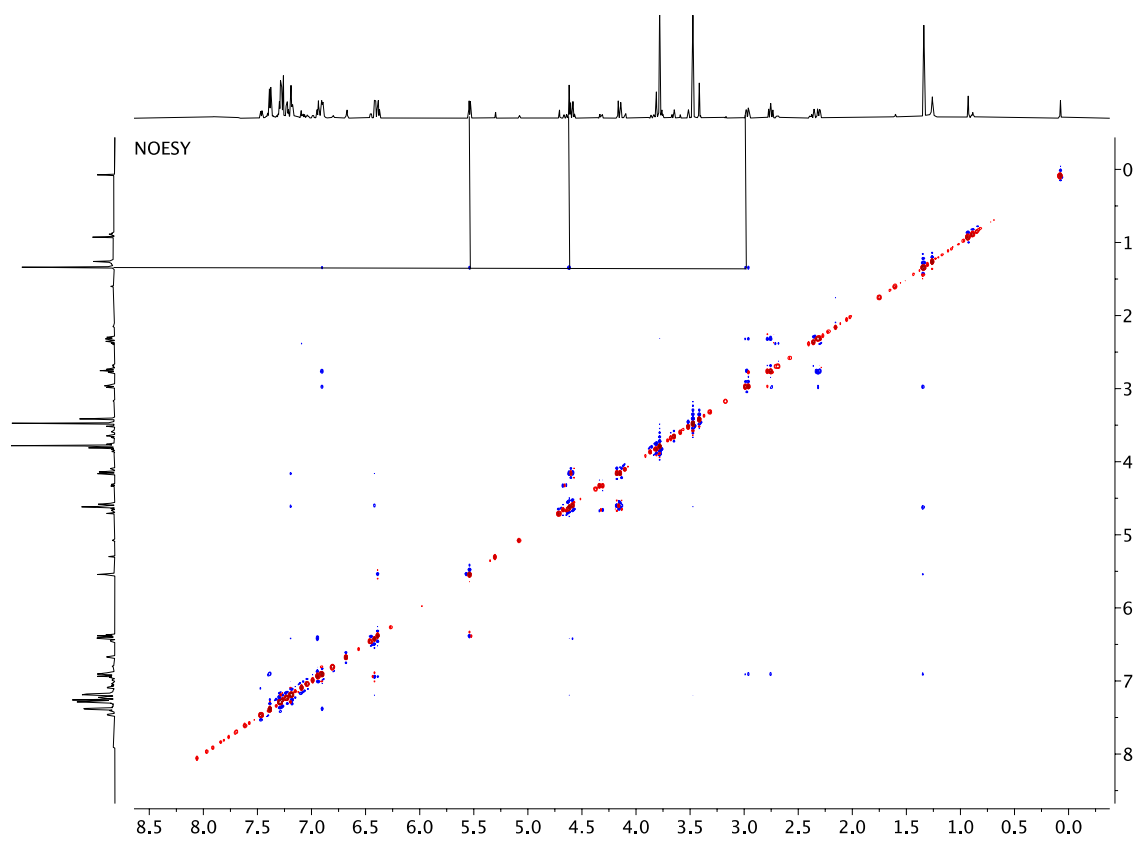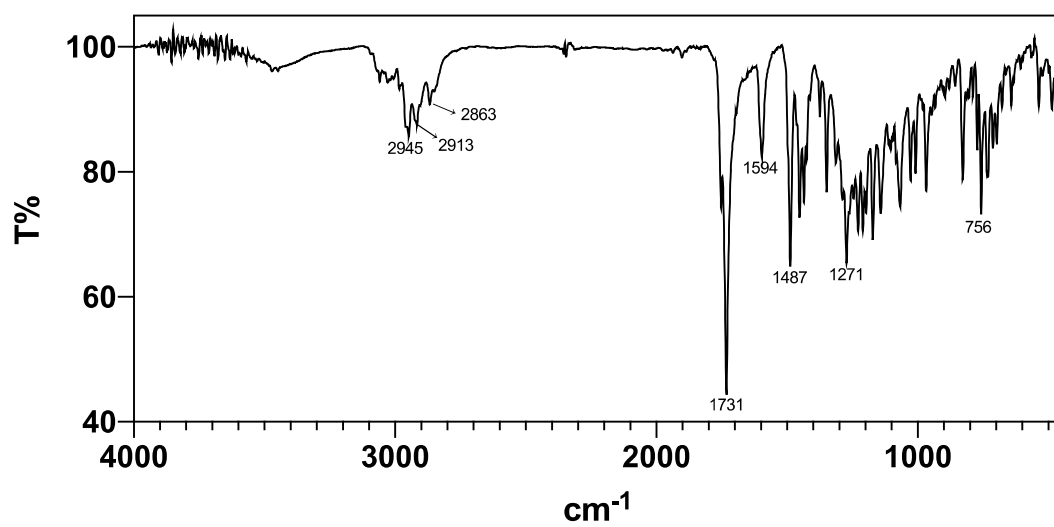



# Acquisition Parameter

|             |          |                    |          |                    |        |
|-------------|----------|--------------------|----------|--------------------|--------|
| Source Type | ESI      | Ion Polarity       | Positive | Set Corrector Fill | 74 V   |
| n/a         | n/a      | Set Capillary Exit | 80.0 V   | Set Pulsar Pull    | 799 V  |
| Scan Begin  | 50 m/z   | Set Hexapole RF    | 60.0 V   | Set Pulsar Push    | 799 V  |
| Scan End    | 3000 m/z | Set Skimmer 1      | 50.0 V   | Set Reflector      | 1700 V |
|             |          | Set Hexapole 1     | 24.3 V   | Set Flight Tube    | 8600 V |
|             |          |                    |          | Set Detector TOF   | 2311 V |

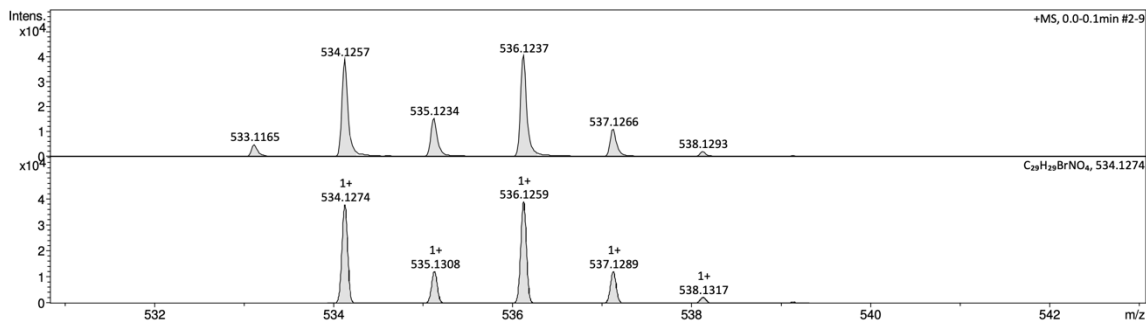

| Meas. m/z | # | Ion Formula                                       | m/z      | err [ppm] | mSigma | # mSigma | Score  | rdb  | e <sup>-</sup> Conf | N-Rule |
|-----------|---|---------------------------------------------------|----------|-----------|--------|----------|--------|------|---------------------|--------|
| 534.1257  | 1 | C <sub>29</sub> H <sub>29</sub> BrNO <sub>4</sub> | 534.1274 | 3.2       | 35.3   | 1        | 100.00 | 15.5 | even                | ok     |

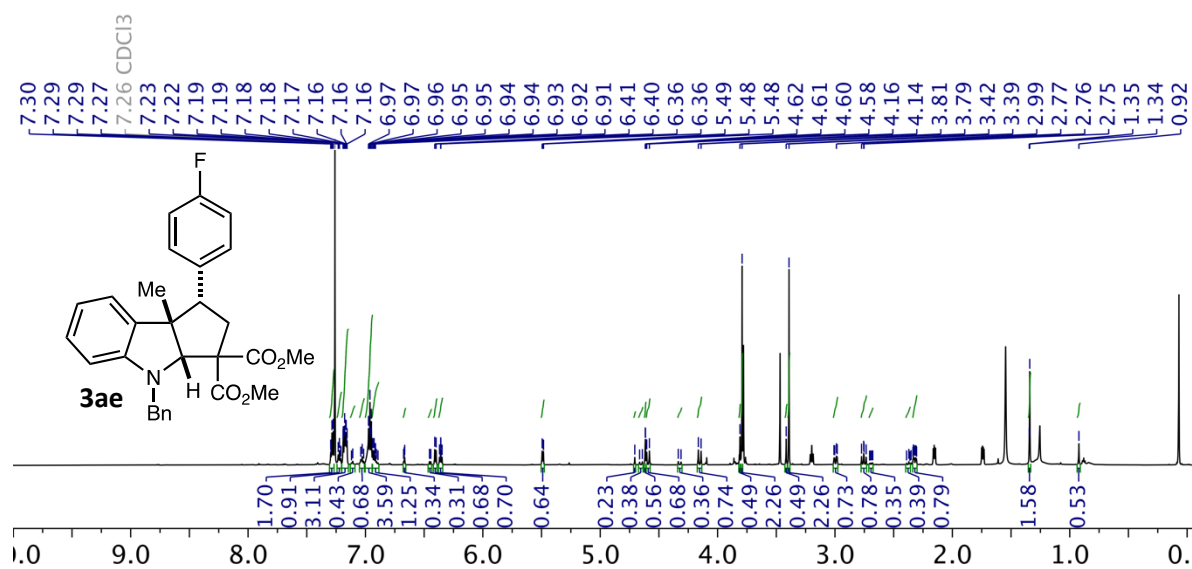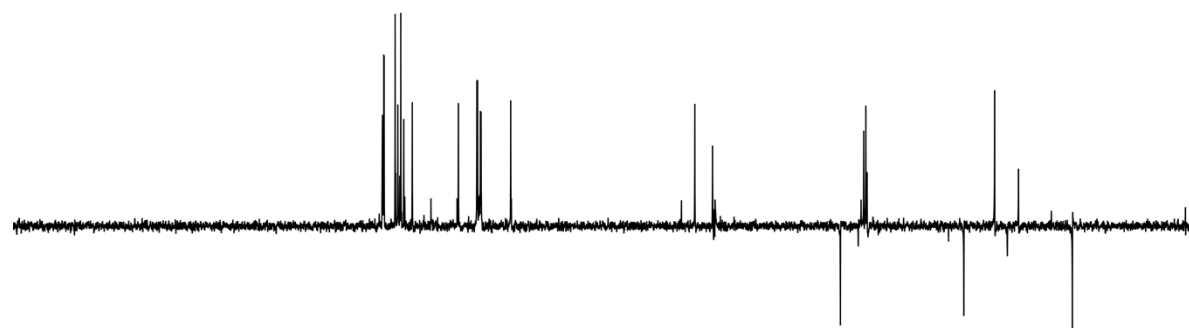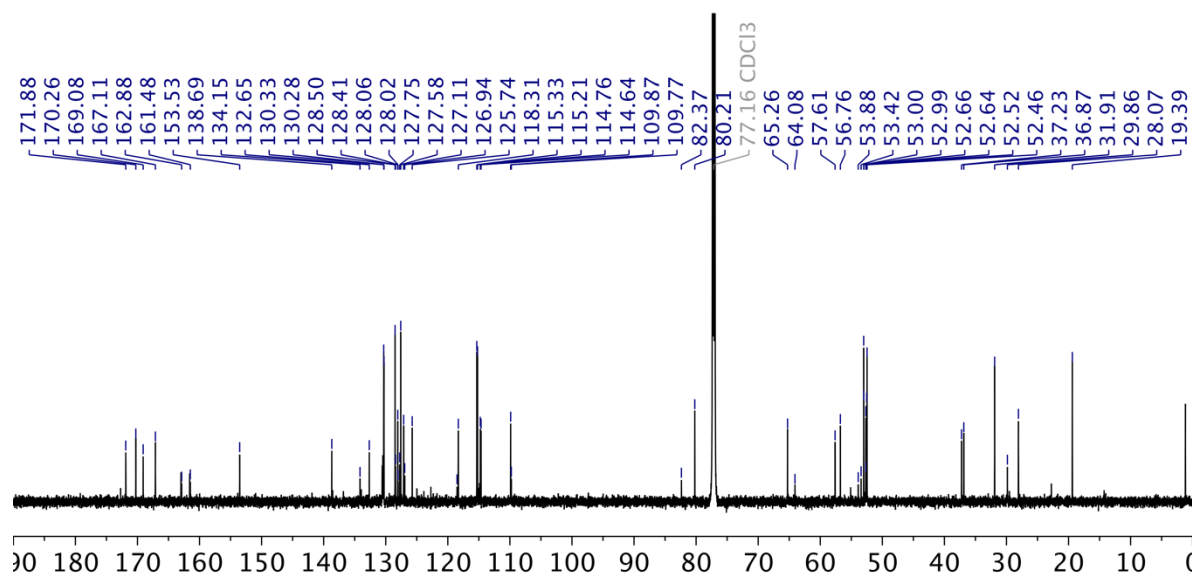

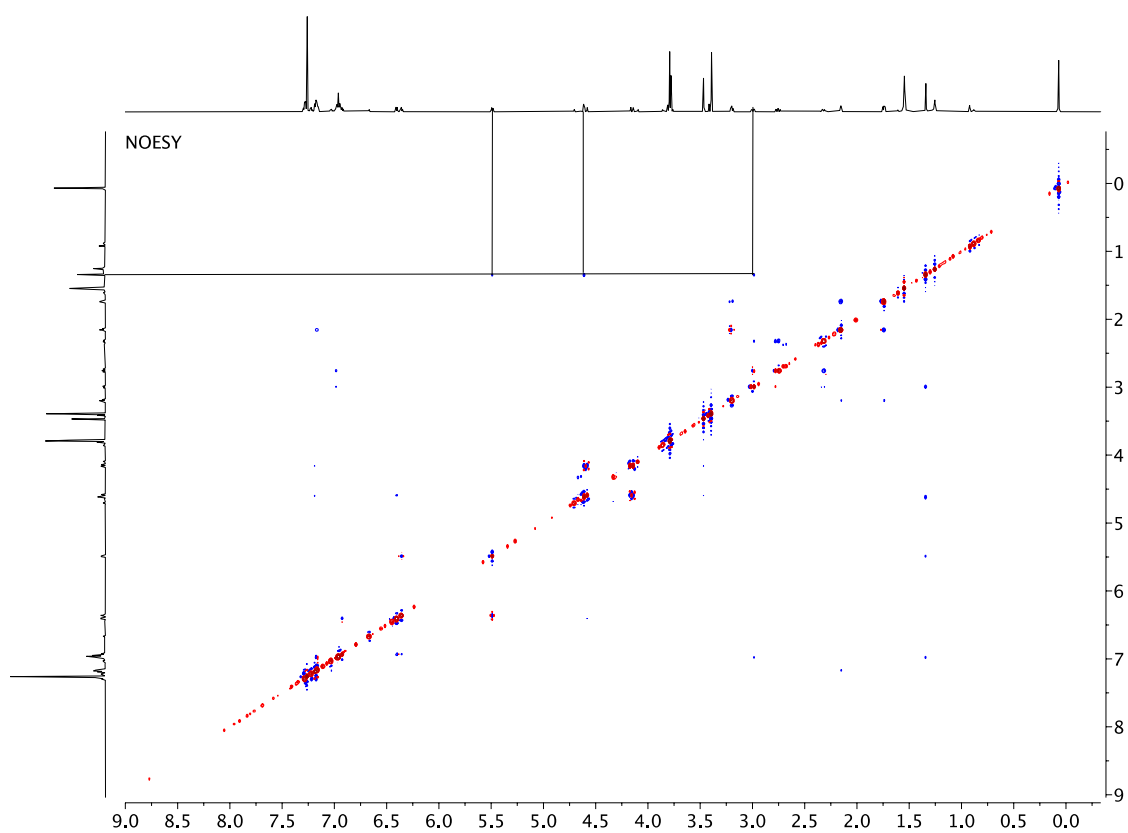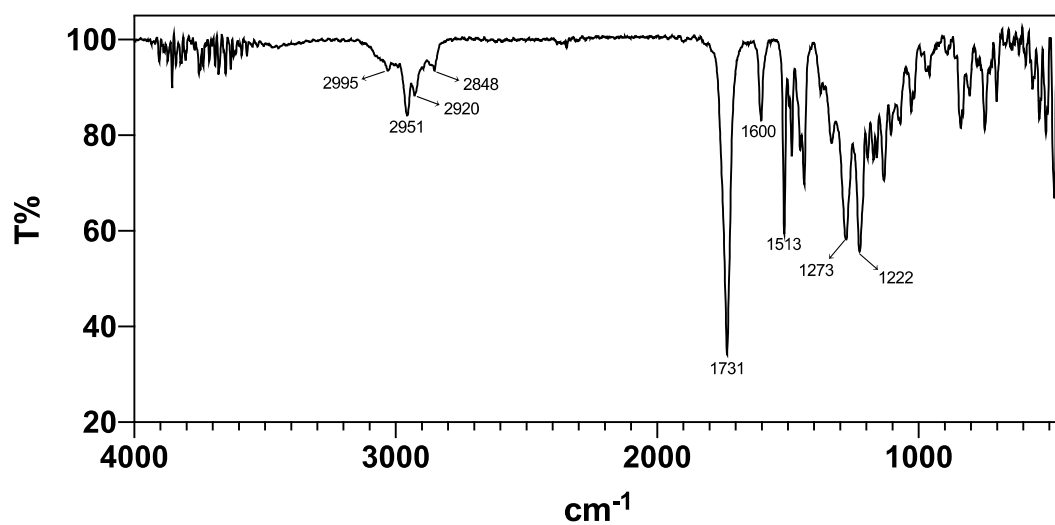

| Acquisition Parameter |          |                    |          |                    |        |
|-----------------------|----------|--------------------|----------|--------------------|--------|
| Source Type           | ESI      | Ion Polarity       | Positive | Set Corrector Fill | 74 V   |
| n/a                   | n/a      | Set Capillary Exit | 80.0 V   | Set Pulsar Pull    | 799 V  |
| Scan Begin            | 50 m/z   | Set Hexapole RF    | 60.0 V   | Set Pulsar Push    | 799 V  |
| Scan End              | 3000 m/z | Set Skimmer 1      | 50.0 V   | Set Reflector      | 1700 V |
|                       |          | Set Hexapole 1     | 24.3 V   | Set Flight Tube    | 8600 V |
|                       |          |                    |          | Set Detector TOF   | 2311 V |

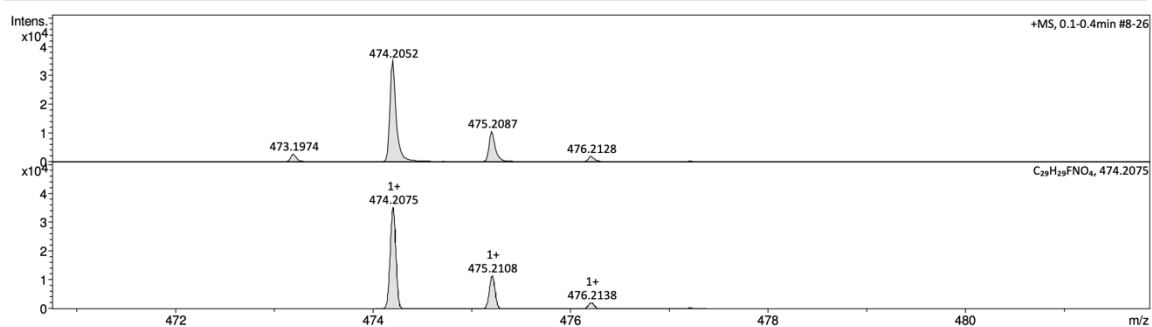

| Meas. m/z | # | Ion Formula                                      | m/z      | err [ppm] | mSigma | # mSigma | Score  | rdb  | e <sup>-</sup> | Conf | N-Rule |
|-----------|---|--------------------------------------------------|----------|-----------|--------|----------|--------|------|----------------|------|--------|
| 474.2052  | 1 | C <sub>29</sub> H <sub>29</sub> FNO <sub>4</sub> | 474.2075 | 5.0       | 9.3    | 1        | 100.00 | 15.5 | even           |      | ok     |

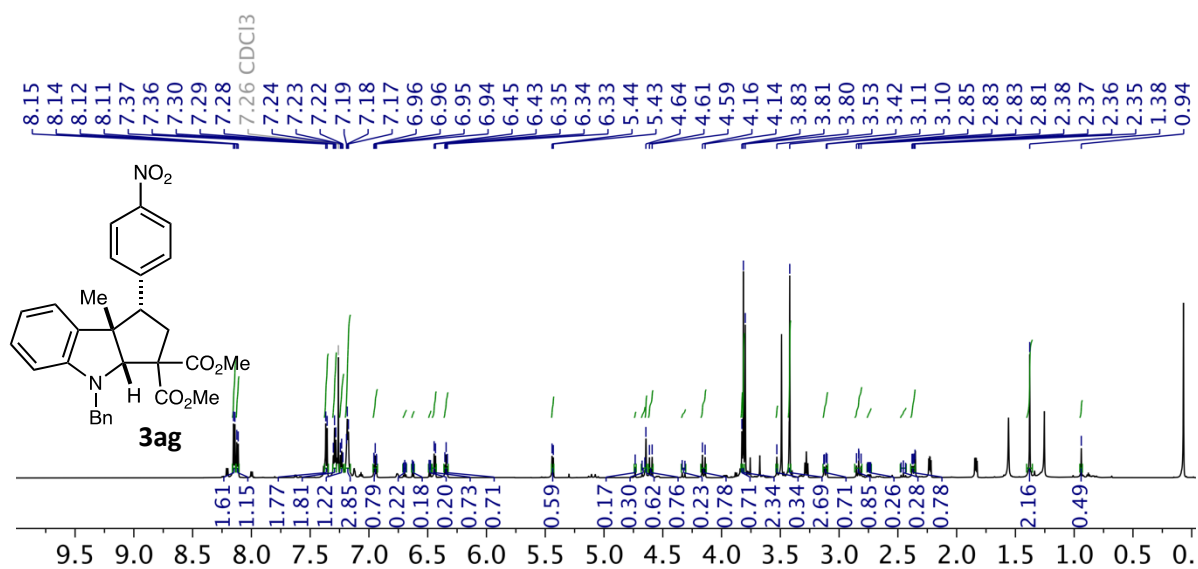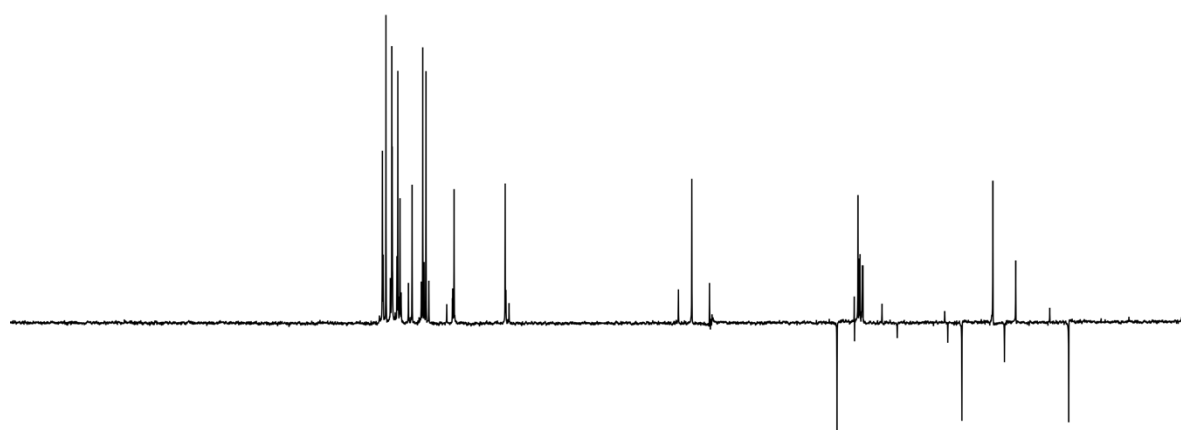

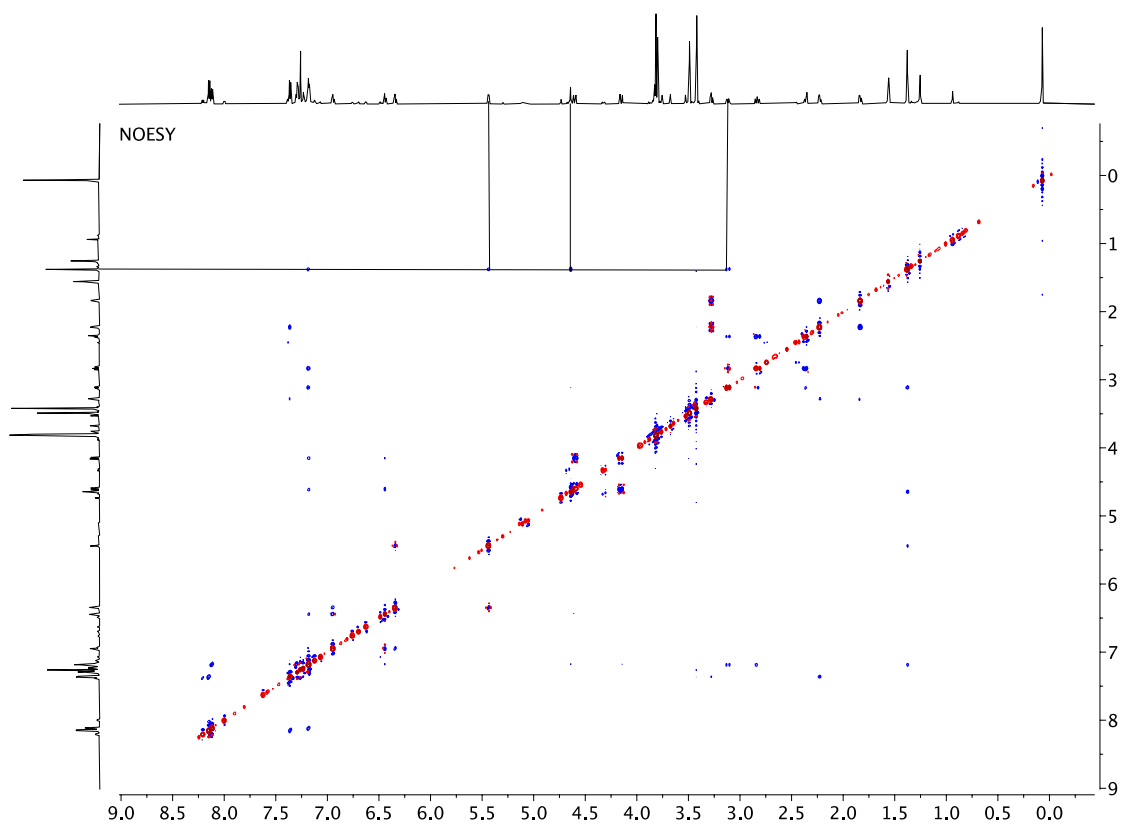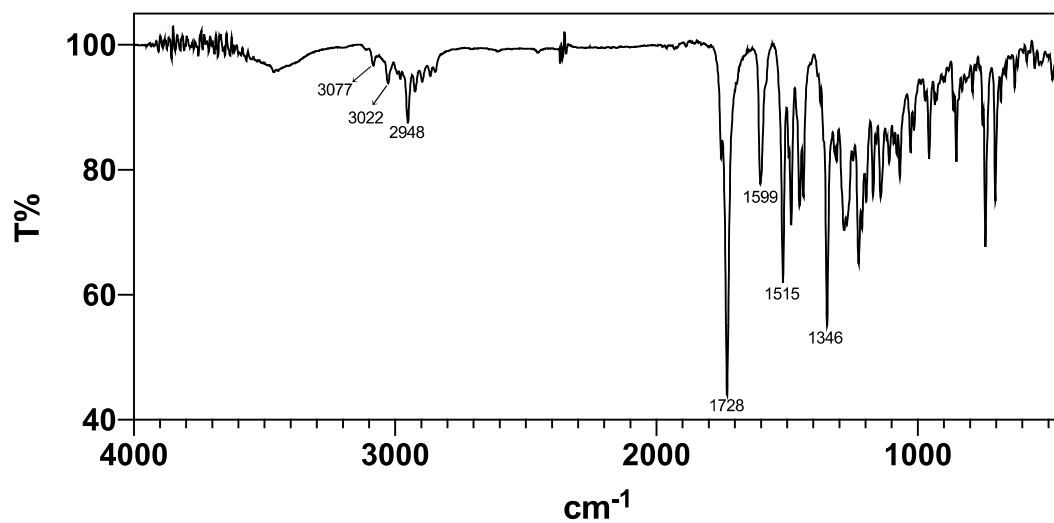

# Acquisition Parameter

|             |          |                    |          |                    |        |
|-------------|----------|--------------------|----------|--------------------|--------|
| Source Type | ESI      | Ion Polarity       | Positive | Set Corrector Fill | 74 V   |
| n/a         | n/a      | Set Capillary Exit | 80.0 V   | Set Pulsar Pull    | 799 V  |
| Scan Begin  | 50 m/z   | Set Hexapole RF    | 60.0 V   | Set Pulsar Push    | 799 V  |
| Scan End    | 3000 m/z | Set Skimmer 1      | 50.0 V   | Set Reflector      | 1700 V |
|             |          | Set Hexapole 1     | 24.3 V   | Set Flight Tube    | 8600 V |
|             |          |                    |          | Set Detector TOF   | 2311 V |

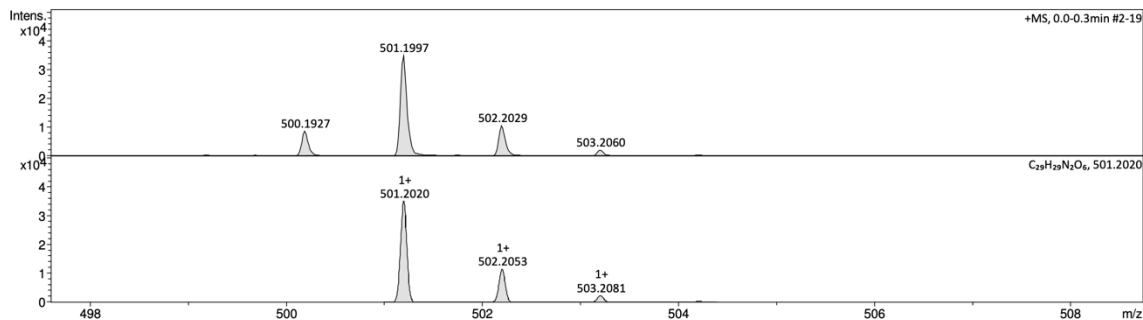

| Meas. m/z | # | Ion Formula                                                   | m/z      | err [ppm] | mSigma | # mSigma | Score  | rdb  | e <sup>-</sup> | Conf | N-Rule |
|-----------|---|---------------------------------------------------------------|----------|-----------|--------|----------|--------|------|----------------|------|--------|
| 501.1997  | 1 | C <sub>29</sub> H <sub>29</sub> N <sub>2</sub> O <sub>6</sub> | 501.2020 | 4.5       | 12.1   | 1        | 100.00 | 16.5 | even           |      | ok     |

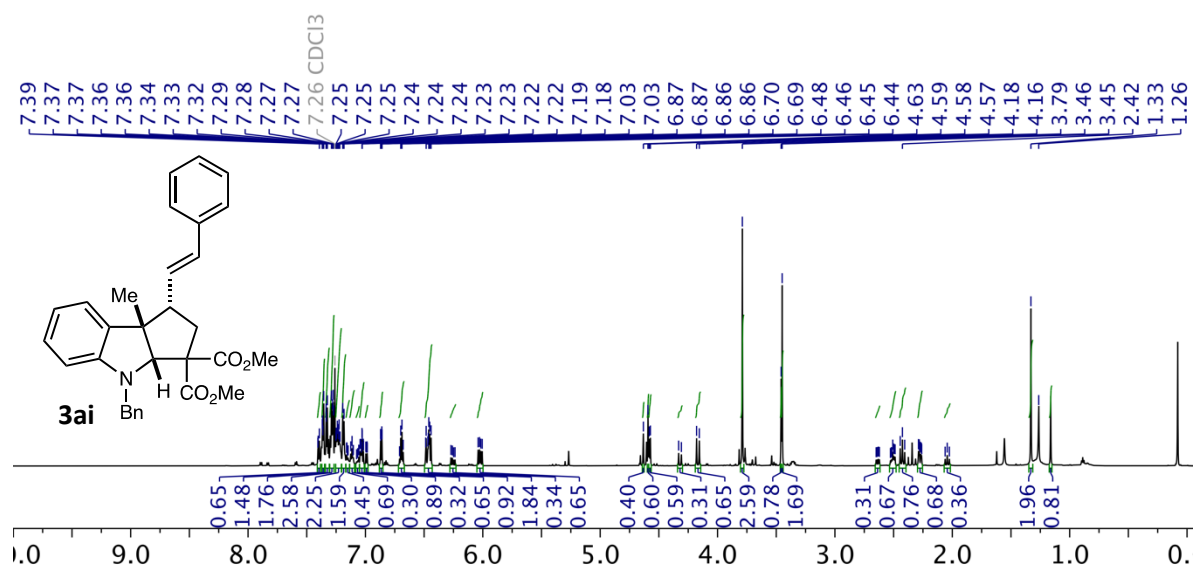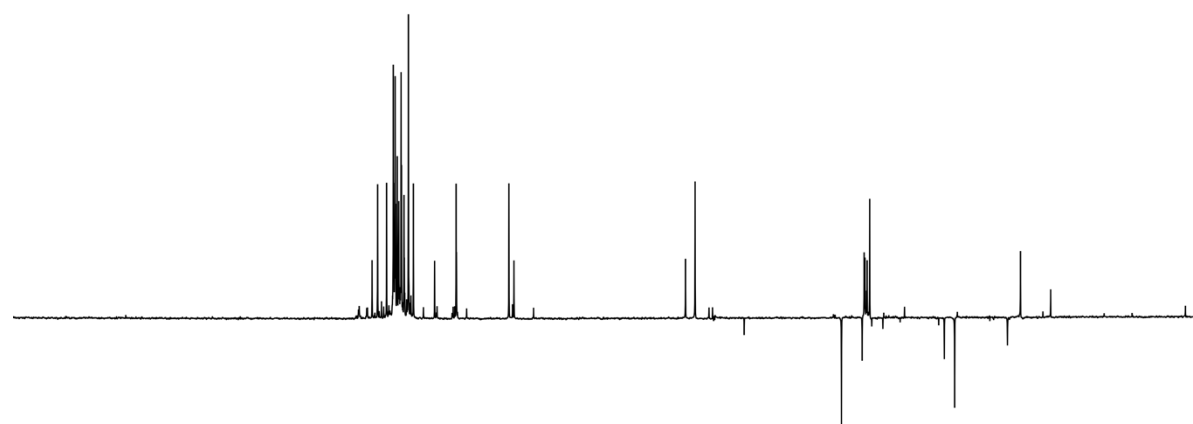



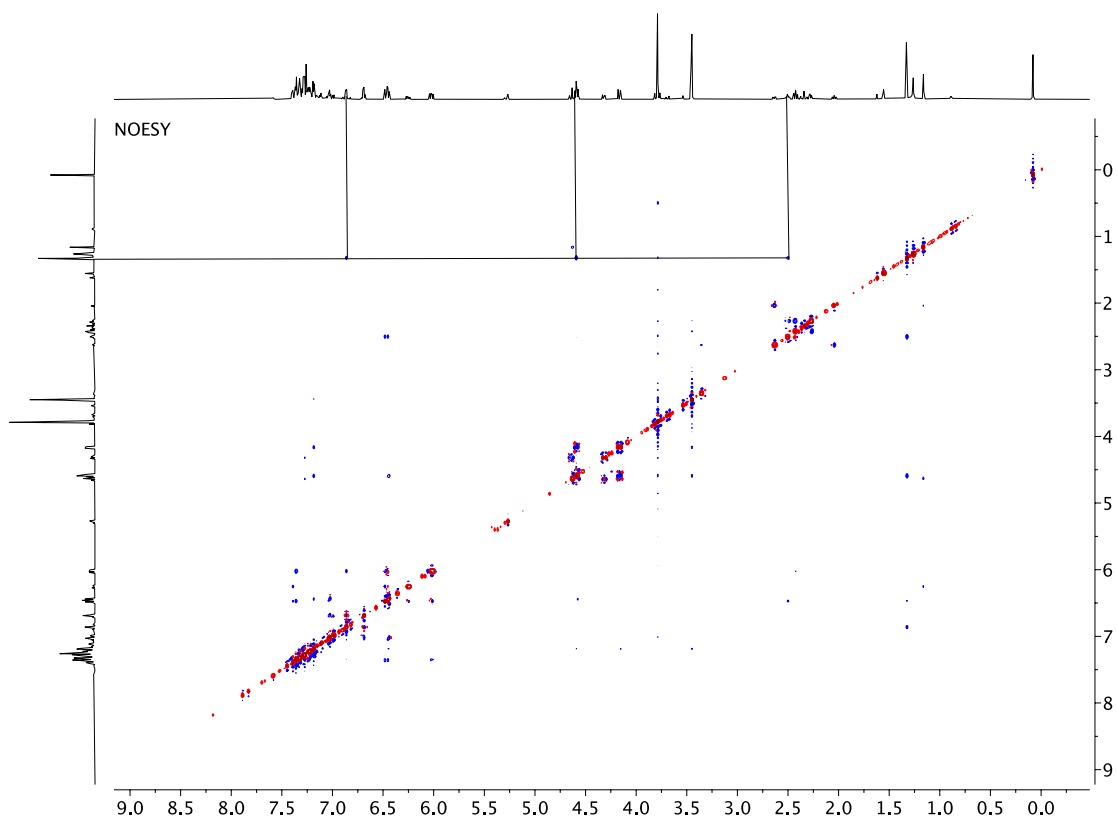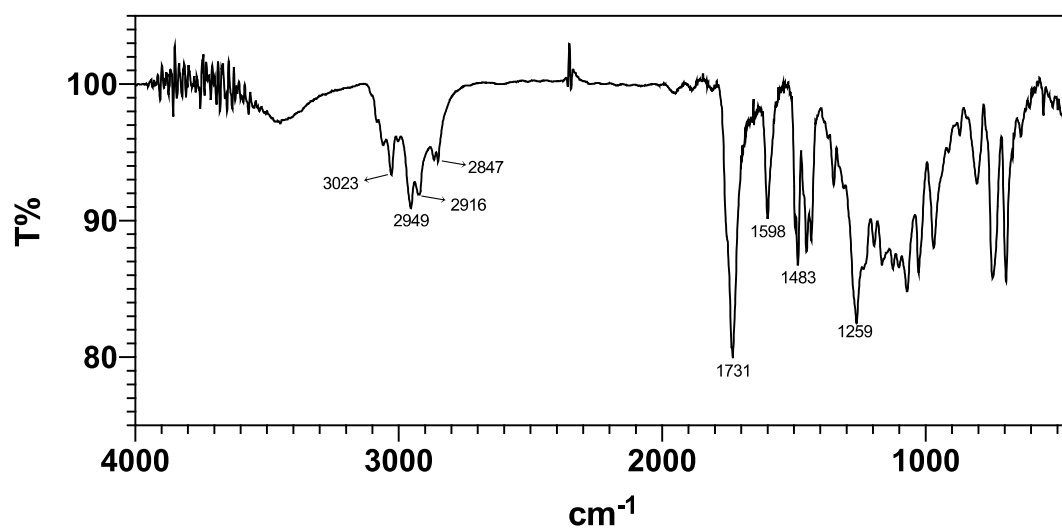

# Acquisition Parameter

|             |          |                    |          |                    |        |
|-------------|----------|--------------------|----------|--------------------|--------|
| Source Type | ESI      | Ion Polarity       | Positive | Set Corrector Fill | 74 V   |
| n/a         | n/a      | Set Capillary Exit | 80.0 V   | Set Pulsar Pull    | 799 V  |
| Scan Begin  | 50 m/z   | Set Hexapole RF    | 60.0 V   | Set Pulsar Push    | 799 V  |
| Scan End    | 3000 m/z | Set Skimmer 1      | 50.0 V   | Set Reflector      | 1700 V |
|             |          | Set Hexapole 1     | 24.3 V   | Set Flight Tube    | 8600 V |
|             |          |                    |          | Set Detector TOF   | 2311 V |

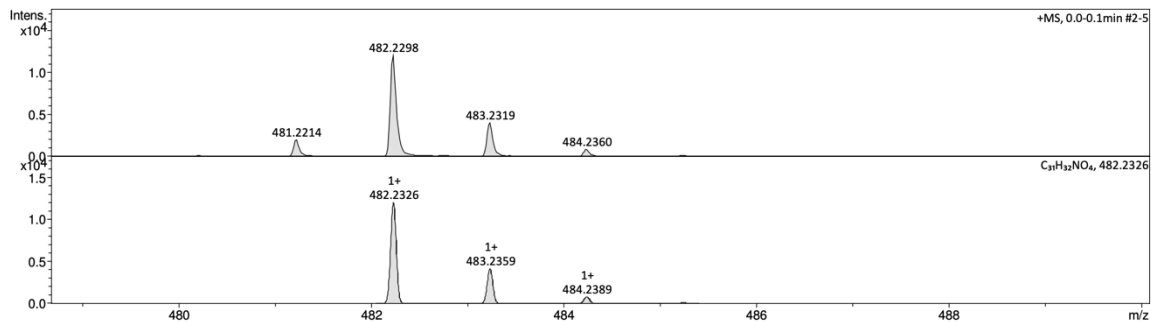

| Meas. m/z | # | Ion Formula                                     | m/z      | err [ppm] | mSigma | # mSigma | Score  | rdB  | e <sup>-</sup> | Conf | N-Rule |
|-----------|---|-------------------------------------------------|----------|-----------|--------|----------|--------|------|----------------|------|--------|
| 482.2298  | 1 | C <sub>31</sub> H <sub>32</sub> NO <sub>4</sub> | 482.2326 | 5.7       | 6.4    | 1        | 100.00 | 16.5 | even           |      | ok     |

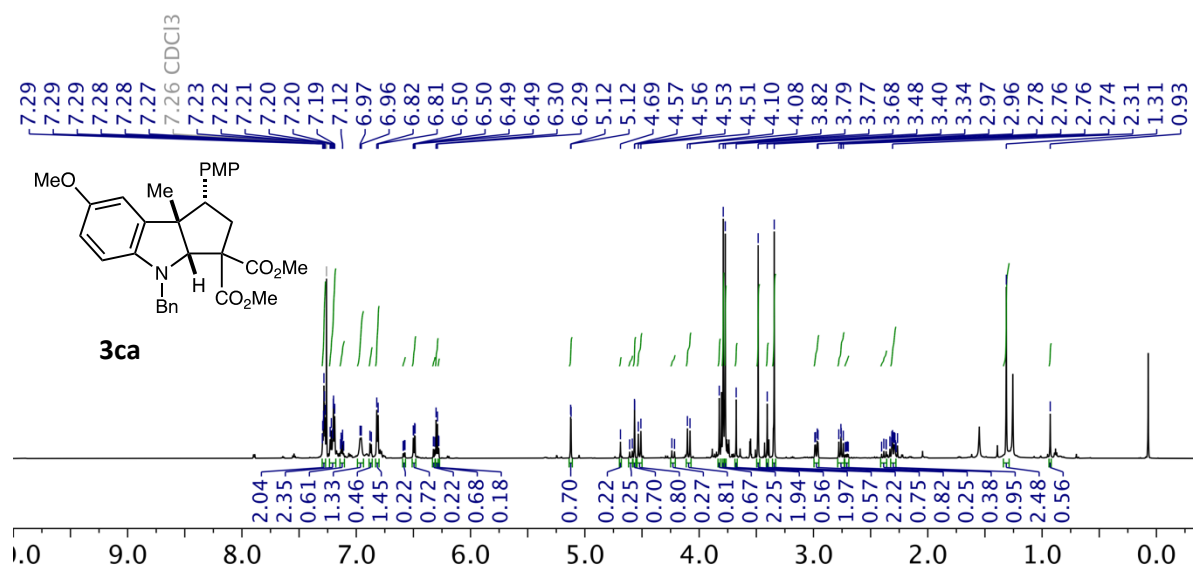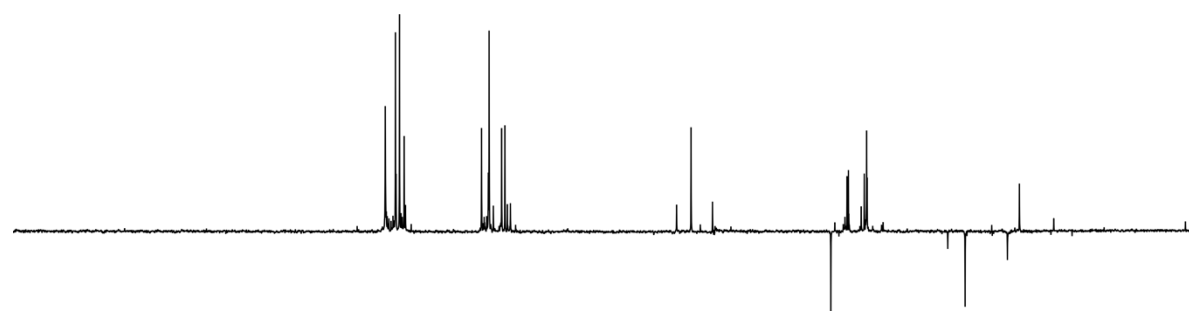

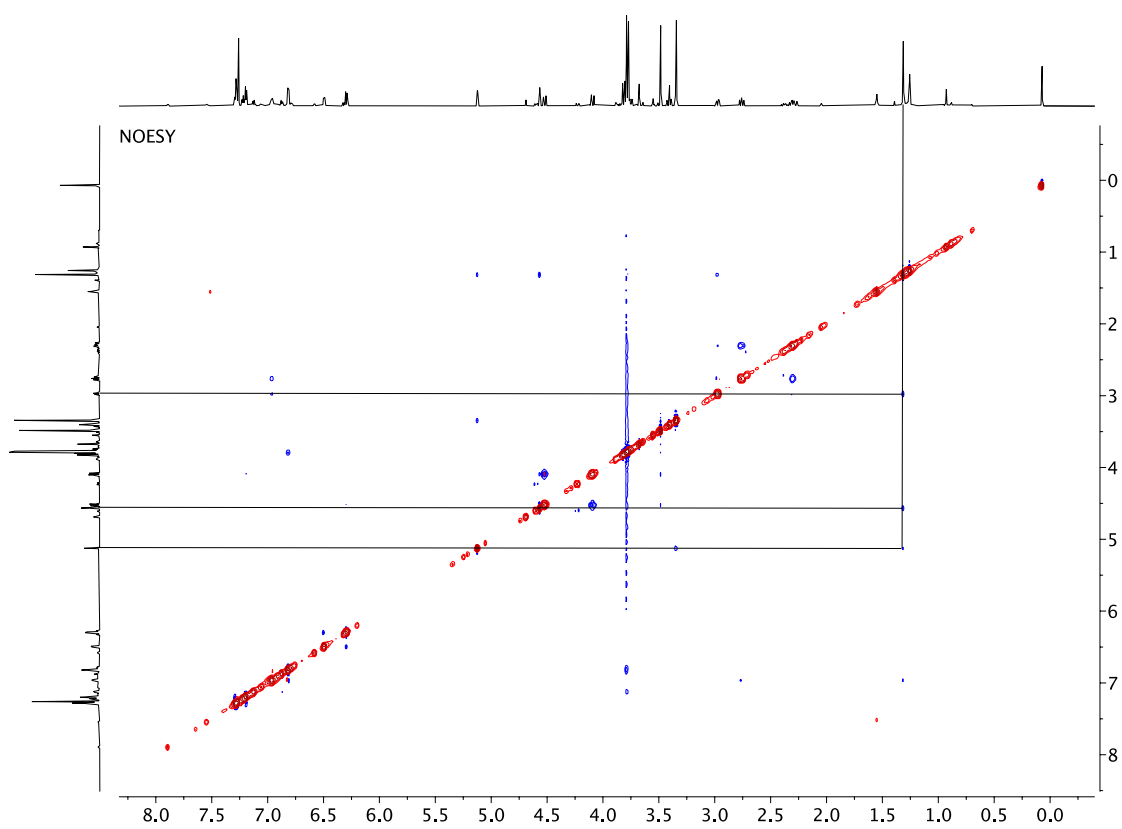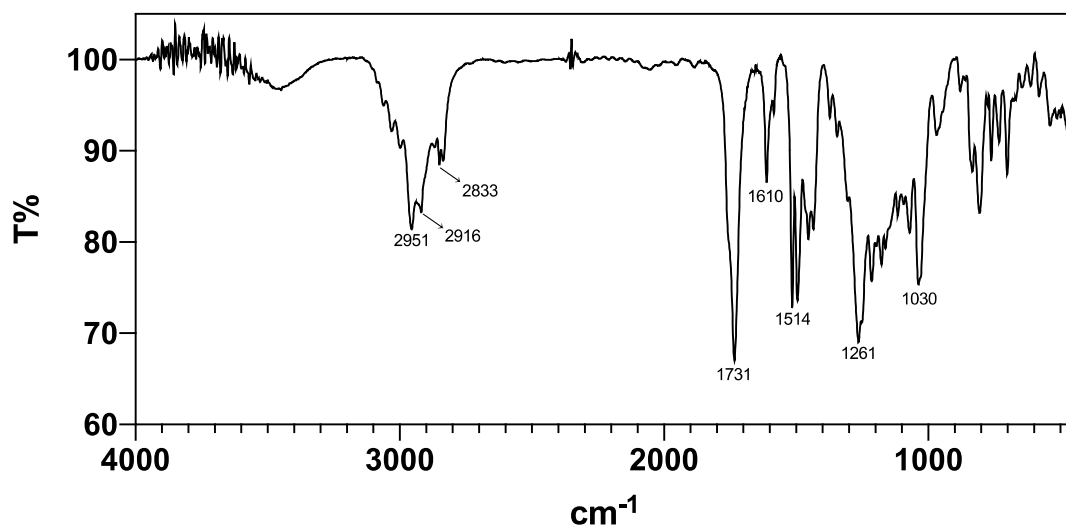

| Acquisition Parameter |          |                    |          |                    |        |
|-----------------------|----------|--------------------|----------|--------------------|--------|
| Source Type           | ESI      | Ion Polarity       | Positive | Set Corrector Fill | 74 V   |
| n/a                   | n/a      | Set Capillary Exit | 80.0 V   | Set Pulsar Pull    | 799 V  |
| Scan Begin            | 50 m/z   | Set Hexapole RF    | 60.0 V   | Set Pulsar Push    | 799 V  |
| Scan End              | 3000 m/z | Set Skimmer 1      | 50.0 V   | Set Reflector      | 1700 V |
|                       |          | Set Hexapole 1     | 24.3 V   | Set Flight Tube    | 8600 V |
|                       |          |                    |          | Set Detector TOF   | 2311 V |

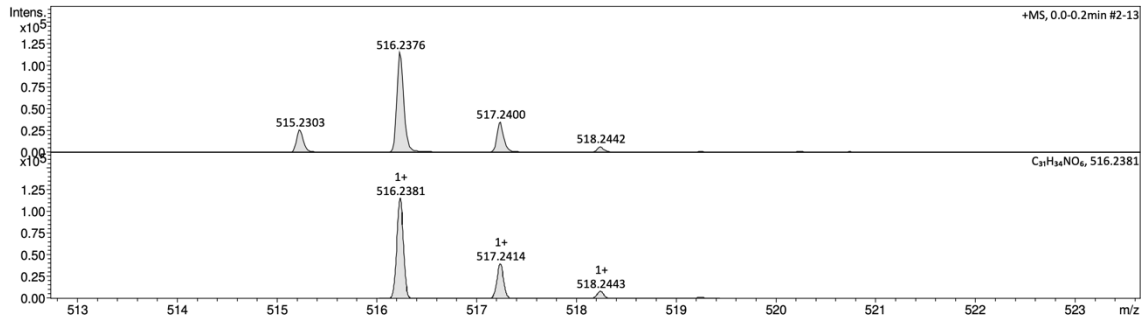

| Meas. m/z | # | Ion Formula | m/z      | err [ppm] | mSigma | # mSigma | Score  | rdb  | e <sup>-</sup> | Conf | N-Rule |
|-----------|---|-------------|----------|-----------|--------|----------|--------|------|----------------|------|--------|
| 516.2376  | 1 | C31H34NO6   | 516.2381 | 0.8       | 21.9   | 1        | 100.00 | 15.5 | even           |      | ok     |

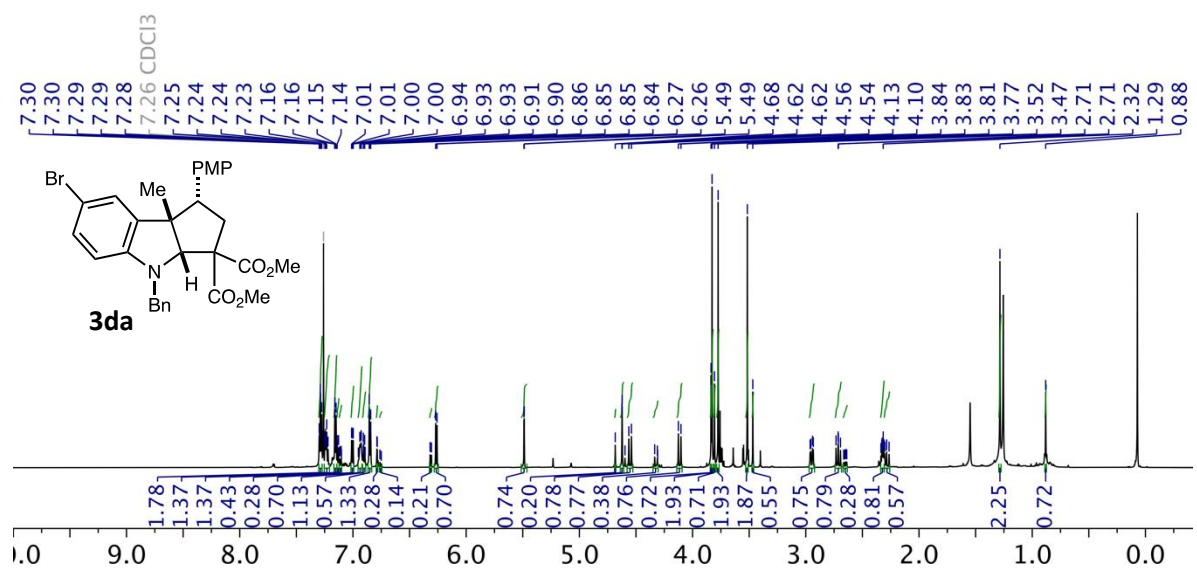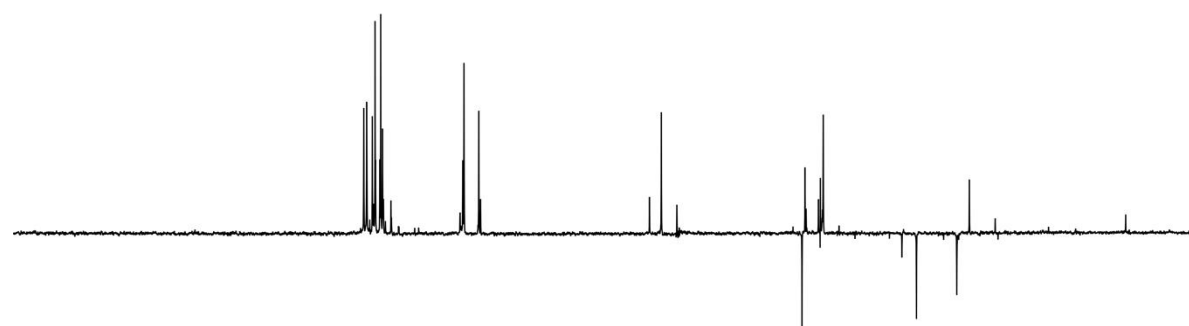

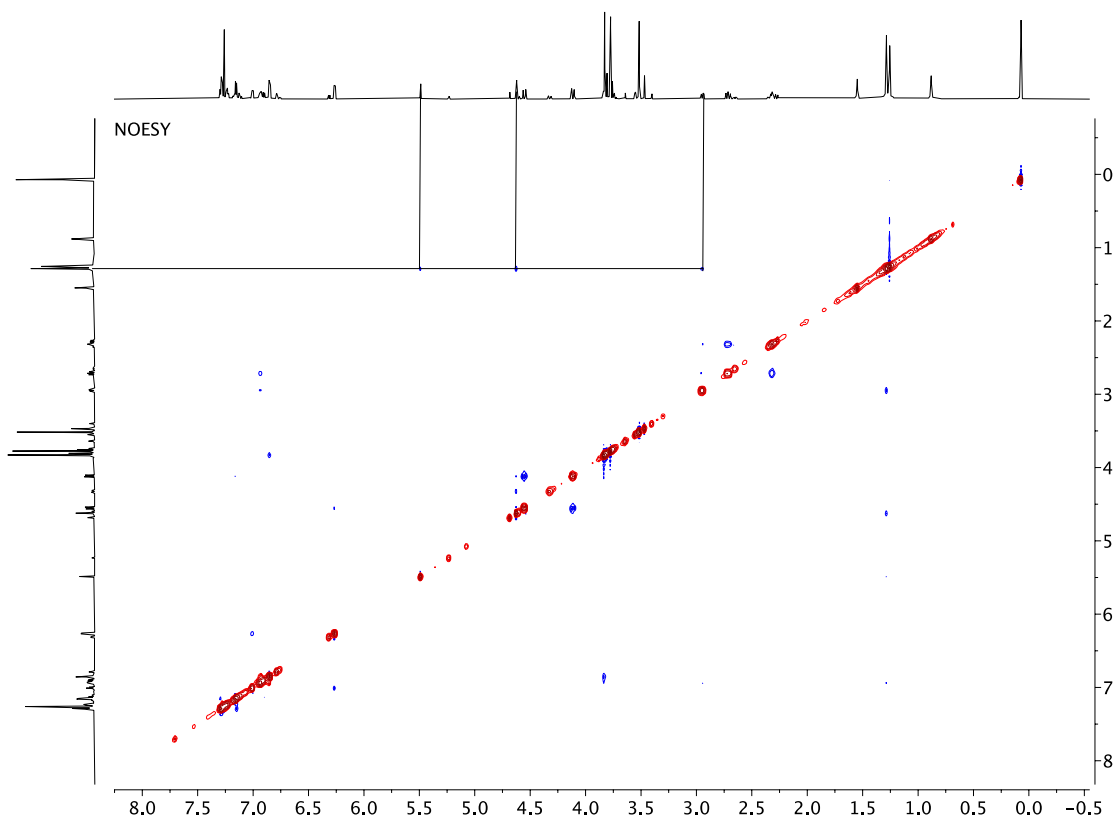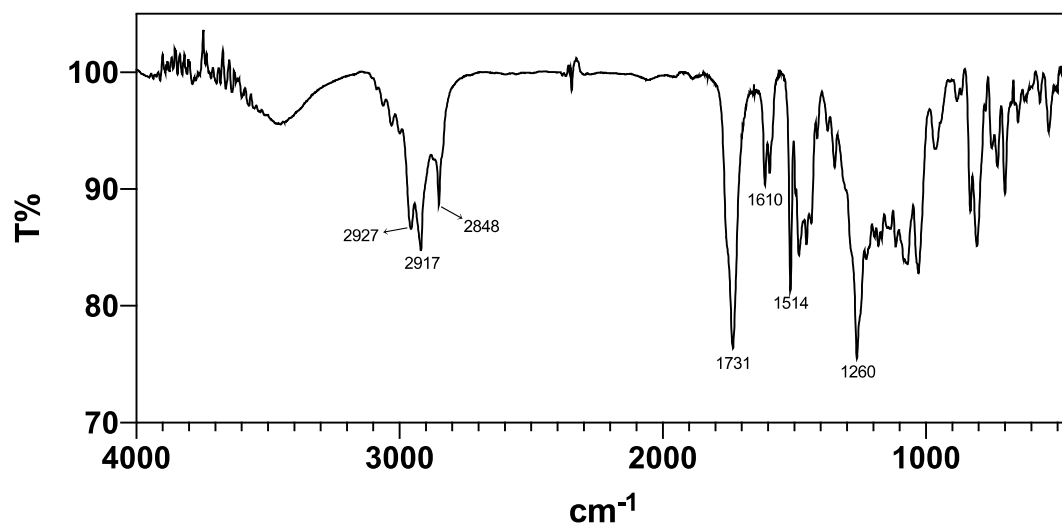

# Acquisition Parameter

|             |          |                    |          |                    |        |
|-------------|----------|--------------------|----------|--------------------|--------|
| Source Type | ESI      | Ion Polarity       | Positive | Set Corrector Fill | 74 V   |
| n/a         | n/a      | Set Capillary Exit | 80.0 V   | Set Pulsar Pull    | 799 V  |
| Scan Begin  | 50 m/z   | Set Hexapole RF    | 60.0 V   | Set Pulsar Push    | 799 V  |
| Scan End    | 3000 m/z | Set Skimmer 1      | 50.0 V   | Set Reflector      | 1700 V |
|             |          | Set Hexapole 1     | 24.3 V   | Set Flight Tube    | 8600 V |
|             |          |                    |          | Set Detector TOF   | 2311 V |

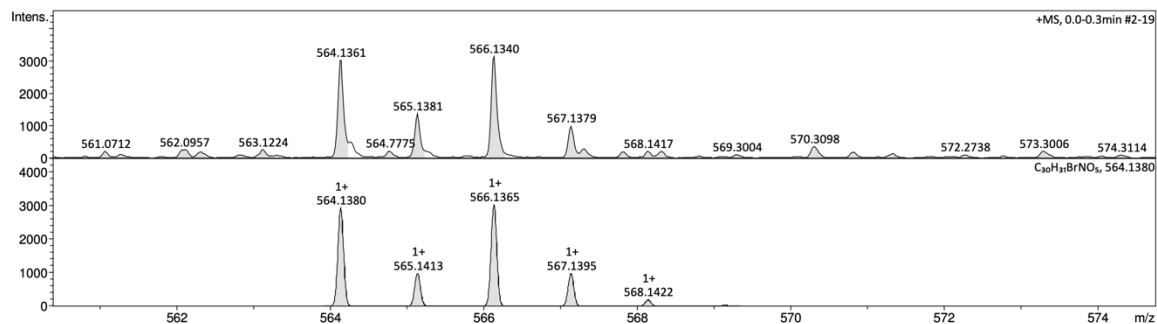

| Meas. m/z | # | Ion Formula | m/z      | err [ppm] | mSigma | # mSigma | Score  | rdb  | e <sup>-</sup> | Conf | N-Rule |
|-----------|---|-------------|----------|-----------|--------|----------|--------|------|----------------|------|--------|
| 564.1361  | 1 | C30H31BrNO5 | 564.1380 | 3.3       | 51.6   | 1        | 100.00 | 15.5 | even           |      | ok     |



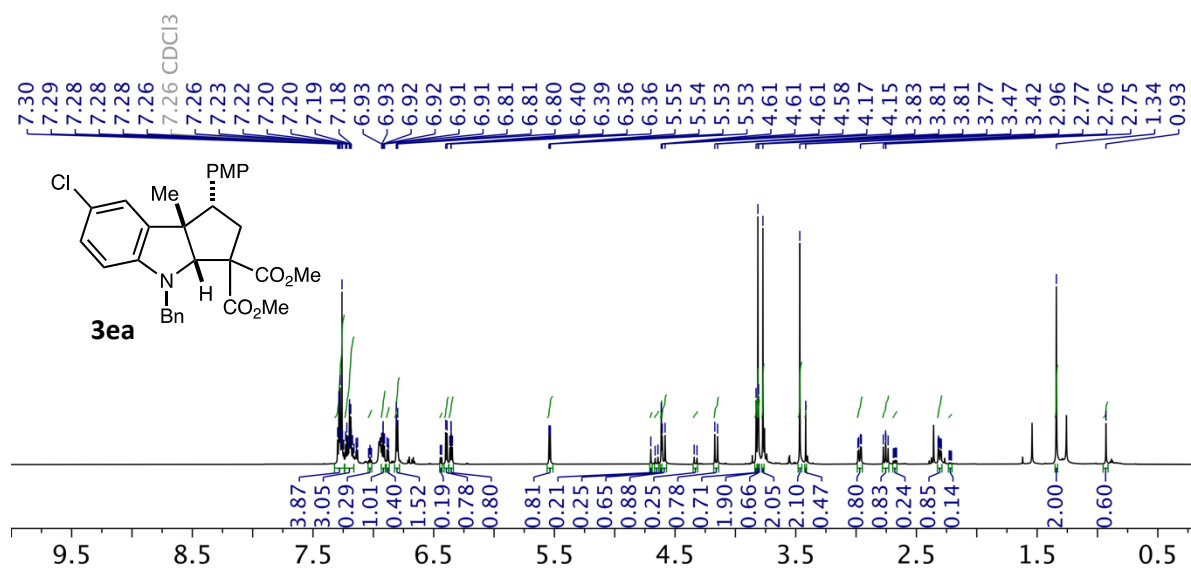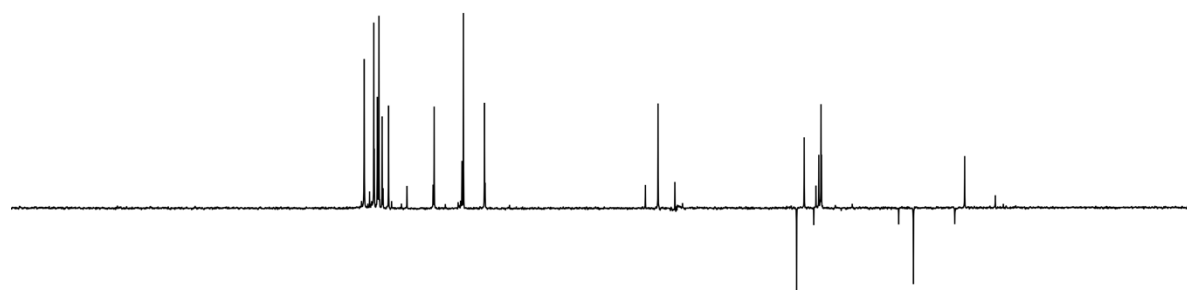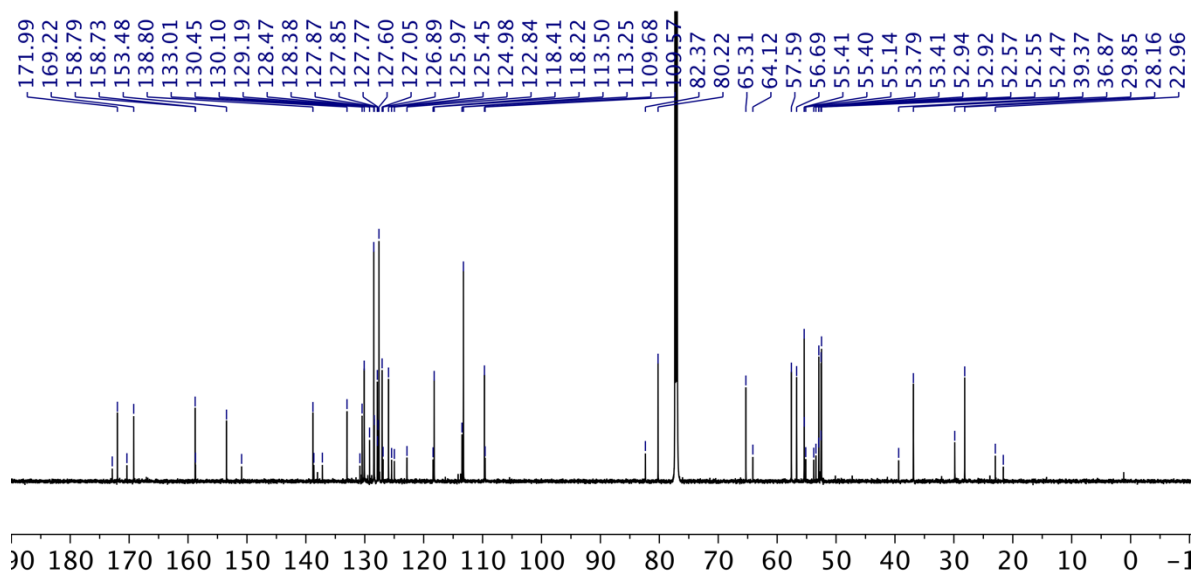

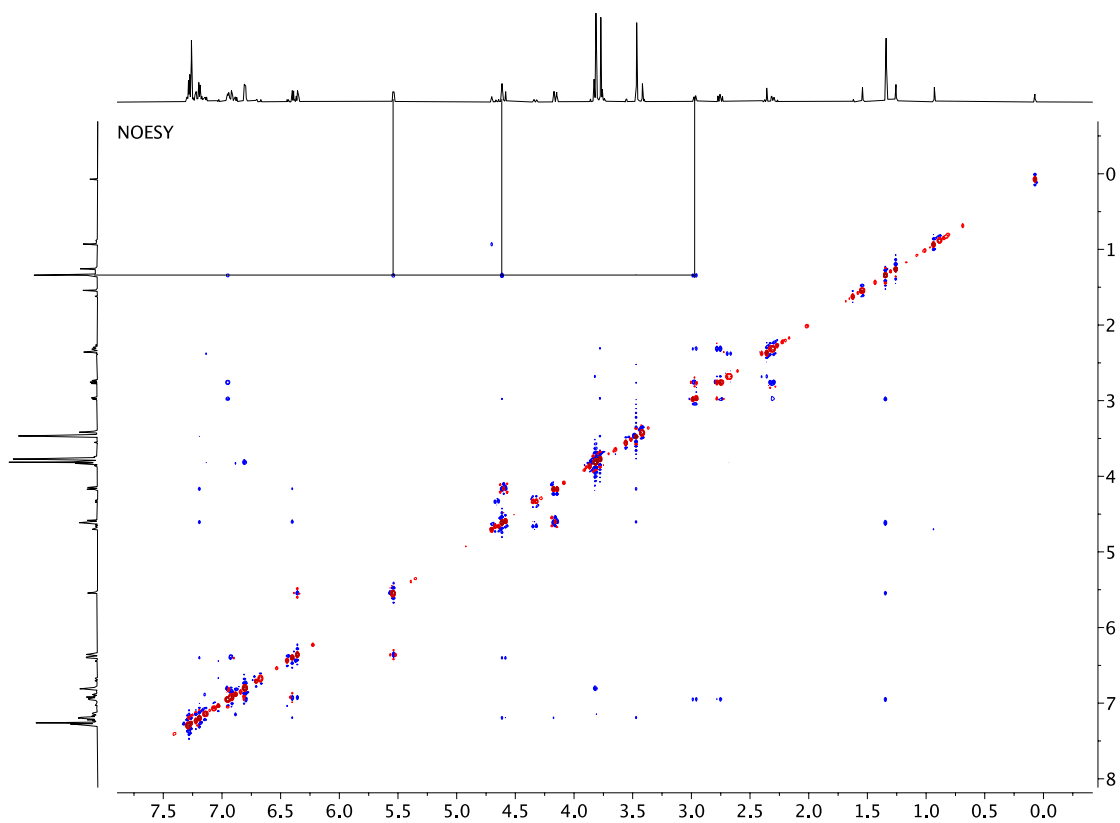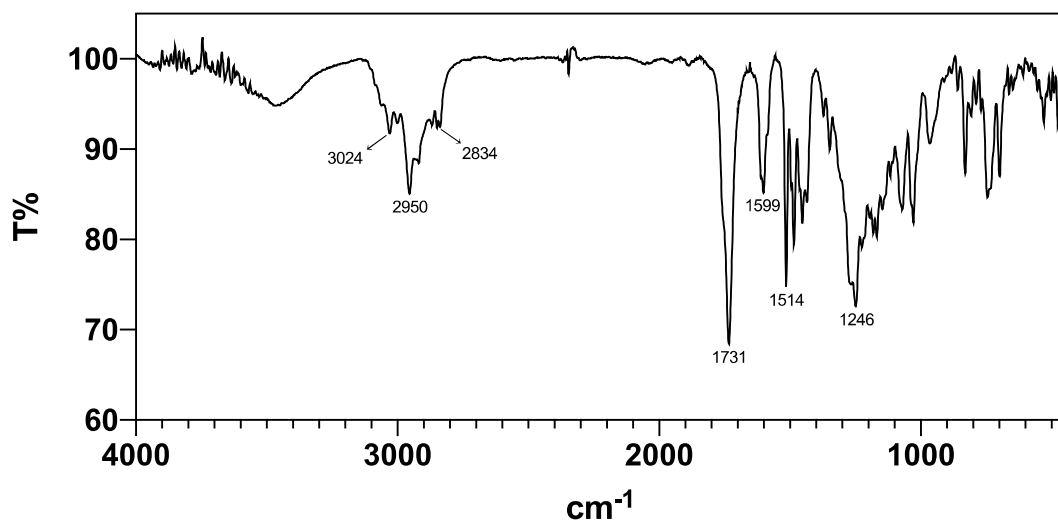

| Acquisition Parameter |          |                    |          |                    |        |
|-----------------------|----------|--------------------|----------|--------------------|--------|
| Source Type           | ESI      | Ion Polarity       | Positive | Set Corrector Fill | 74 V   |
| n/a                   | n/a      | Set Capillary Exit | 80.0 V   | Set Pulsar Pull    | 799 V  |
| Scan Begin            | 50 m/z   | Set Hexapole RF    | 60.0 V   | Set Pulsar Push    | 799 V  |
| Scan End              | 3000 m/z | Set Skimmer 1      | 50.0 V   | Set Reflector      | 1700 V |
|                       |          | Set Hexapole 1     | 24.3 V   | Set Flight Tube    | 8600 V |
|                       |          |                    |          | Set Detector TOF   | 2311 V |

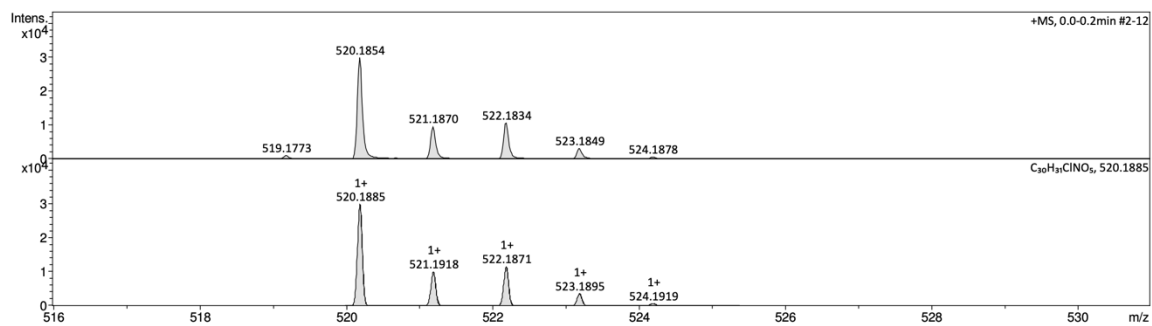

| Meas. m/z | # | Ion Formula                                       | m/z      | err [ppm] | mSigma | # mSigma | Score  | rdb  | e <sup>-</sup> Conf | N-Rule |
|-----------|---|---------------------------------------------------|----------|-----------|--------|----------|--------|------|---------------------|--------|
| 520.1854  | 1 | C <sub>30</sub> H <sub>31</sub> ClNO <sub>5</sub> | 520.1885 | 5.9       | 16.8   | 1        | 100.00 | 15.5 | even                | ok     |

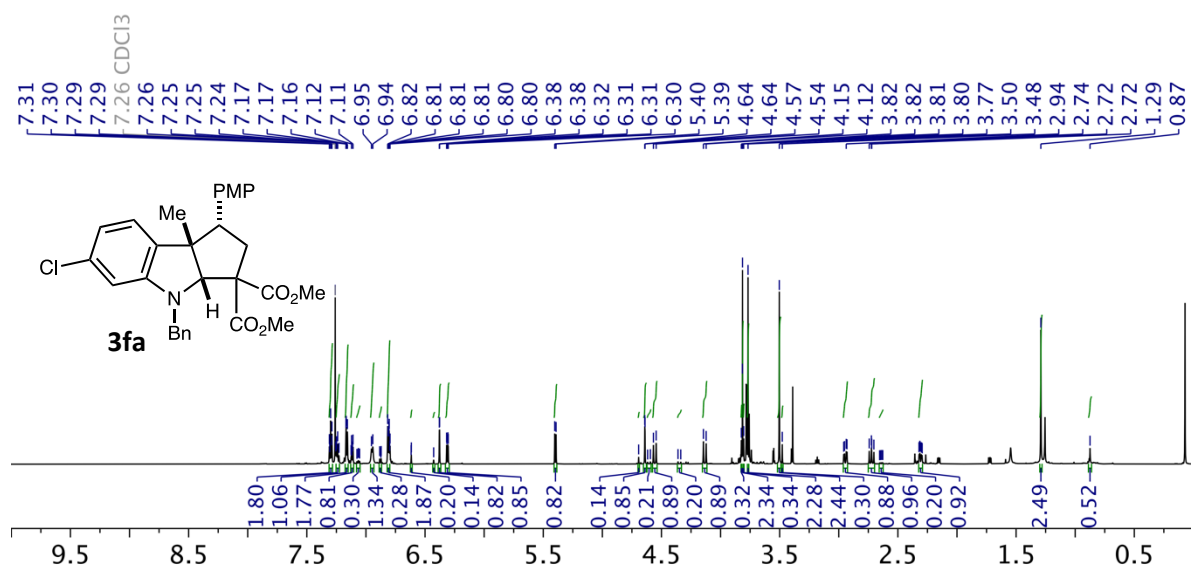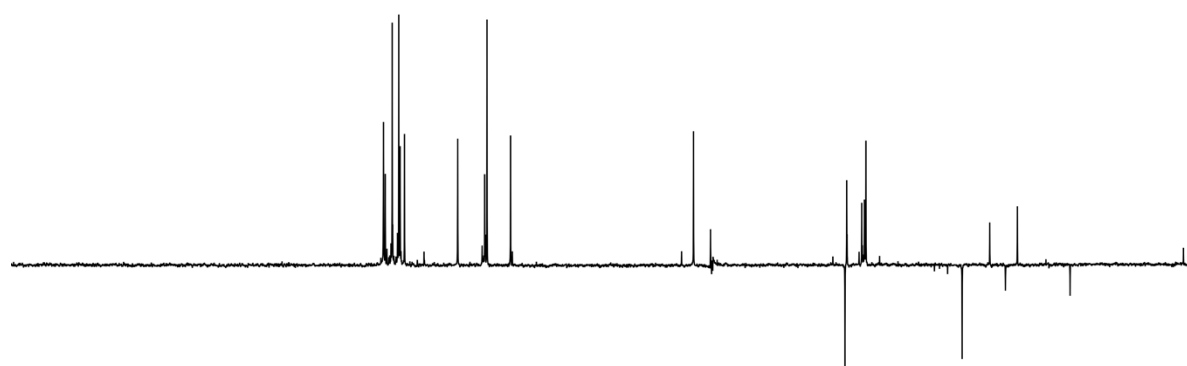

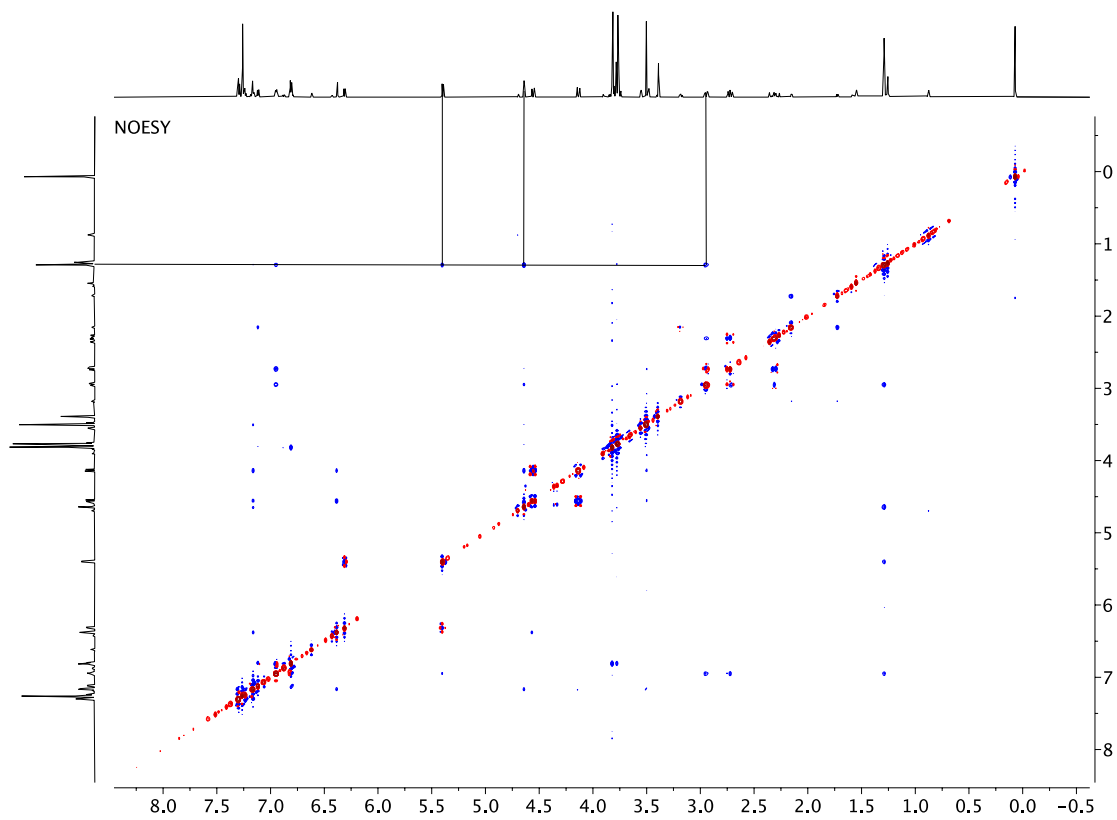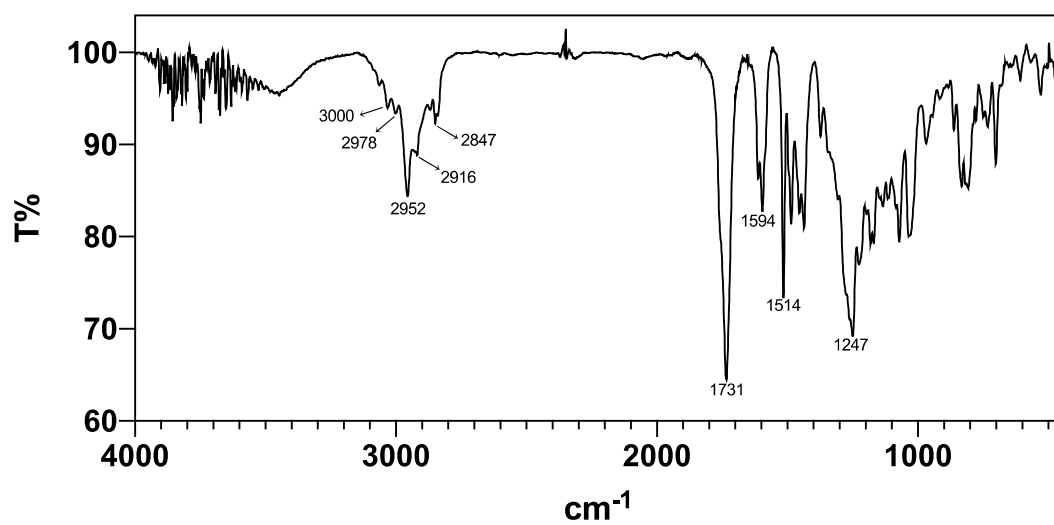

## 6. Crystal data and structure refinement for 3ac.

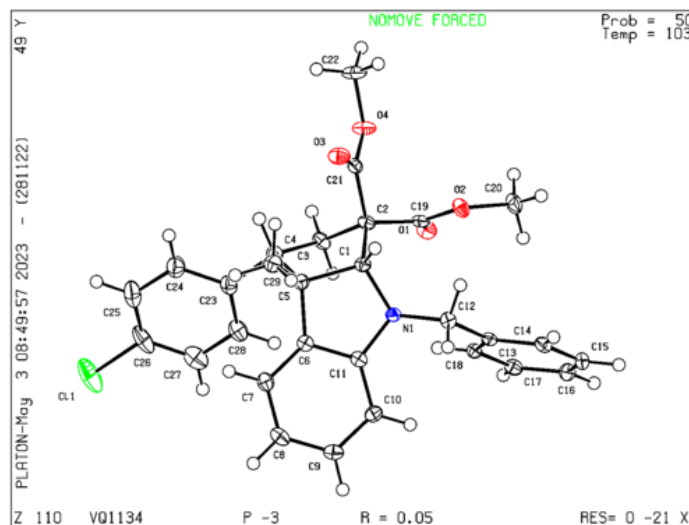

### Crystal data

$C_{29}H_{28}ClNO_4$   
 $M_r = 489.97$   
 Trigonal,  $P\bar{3}$   
 Hall symbol:  $-P\ 3$   
 $a = 24.3118\ (8)\ \text{\AA}$   
 $c = 7.4297\ (4)\ \text{\AA}$   
 $V = 3803.1\ (3)\ \text{\AA}^3$   
 $Z = 6$   
 $F(000) = 1548$

$D_x = 1.284\ \text{Mg m}^{-3}$   
 Mo  $K\alpha$  radiation,  $\lambda = 0.71073\ \text{\AA}$   
 Cell parameters from 9907 reflections  
 $\theta = 2.6\text{--}28.1^\circ$   
 $\mu = 0.19\ \text{mm}^{-1}$   
 $T = 103\ \text{K}$   
 Plate, yellow  
 $0.13 \times 0.07 \times 0.05\ \text{mm}$

### Data collection

Bruker D8 VENTURE PHOTON III-14  
 diffractometer  
 Radiation source: INCOATEC microfocus sealed  
 tube, Incoatec  $I\mu S\ 3.0$   
 Incoatec multilayer mirror monochromator  
 Detector resolution:  $7.3910\ \text{pixels mm}^{-1}$   
 $\omega$  and  $\phi$  scans  
 Absorption correction: multi-scan  
 BRUKER SADABS2016/2

$T_{\min} = 0.887$ ,  $T_{\max} = 0.938$   
 98238 measured reflections  
 4794 independent reflections  
 3829 reflections with  $I > 2\sigma(I)$   
 $R_{\text{int}} = 0.101$   
 $\theta_{\max} = 25.7^\circ$ ,  $\theta_{\min} = 1.9^\circ$   
 $h = -29 \rightarrow 29$   
 $k = -29 \rightarrow 29$   
 $l = -9 \rightarrow 9$

### Refinement

Refinement on  $F^2$   
 Least-squares matrix: full  
 $R[F^2 > 2\sigma(F^2)] = 0.047$   
 $wR(F^2) = 0.123$   
 $S = 1.05$   
 4794 reflections  
 319 parameters  
 0 restraints  
 0 constraints  
 Primary atom site location: dual

Secondary atom site location: dual  
 Hydrogen site location: inferred from neighbouring  
 sites  
 H-atom parameters constrained  
 $w = 1/[\sigma^2(F_o^2) + (0.0479P)^2 + 4.2209P]$   
 where  $P = (F_o^2 + 2F_c^2)/3$   
 $(\Delta/\sigma)_{\max} < 0.001$   
 $\Delta\rho_{\max} = 1.05\ \text{e \AA}^{-3}$   
 $\Delta\rho_{\min} = -0.65\ \text{e \AA}^{-3}$
